# Supplementary material
Source: PubMed Central journal article supplement (PMC6217406)
Supplement: pnas.1801357115.sapp.pdf [file pnas.1801357115.sapp.pdf]

Supplementary Information for

## **Progressive aridification in East Africa over the last half million years and implications for human evolution**

R. Bernhart Owen, Veronica M. Muiruri, Tim K. Lowenstein, Robin W. Renaut, Nathan Rabideaux, Shangde Luo, Alan L Deino, Mark J. Sier, Guillaume Dupont-Nivet, Emma P. McNulty, Kennie Leet, Andrew Cohen, Christopher Campisano, Daniel Deocampo, Chuan-Chou Shen, Anne Billingsley, Anthony Mbuthia

R. Bernhart Owen  
Email: [owen@hkbu.edu.hk](mailto:owen@hkbu.edu.hk)

### **This PDF file includes:**

Supplementary text  
Figs. S1 to S6  
Tables S1 to S8  
Captions for databases S1 to S4  
References for SI reference citations

### **Other supplementary materials for this manuscript include the following:**

Datasets S1 to S4

## Supplementary Information Text

### 1. Drilling

Details of the Lake Magadi drilling operation in June 2014 have been presented previously (1). Drilling took place from earth prepared platforms during the dry season when the lake forms a trona flat. Three holes were drilled at Site 1 and one at Site 2 (Fig. 1C), where downhole geophysical logs were also obtained. Alternating chert and mud caused recovery difficulties because chert became trapped in the drill bit and displaced mud as drilling proceeded. Core recovery ranged between 45–65%. Drilling was terminated in trachyte at core depths of ~133 and ~194 m for Sites 1 and 2, respectively.

### 2. Chronological model

Table S1 shows the control dates used to construct the model and their associated radiometric errors. The chronological model was constructed with Bacon v.2.2 software, which uses Bayesian statistics to reconstruct deposition histories. Outlying dates generally have a minimal effect because the dates are modelled using a student-t distribution with wide tails (2). Prior assumptions about accumulation rates and their variability with time are taken into account, with the following parameters adopted in this study: Accumulation rate priors were set with a mean gamma distribution of  $10 \text{ yr cm}^{-1}$  and a shape of 1.5. Accumulation variability was set with a strength of 4 and a mean of 0.7 with 195 1-m-long sections and no hiatuses. There was no observed trend in Markov Chain Monte Carlo (MCMC) diagnostic plots, indicating a stable solution. Sedimentation rates increase from basal values (below 180 m) of  $0.069 \text{ mm yr}^{-1}$ , to  $0.135 \text{ yr}^{-1}$  to a relatively rapid rate of  $0.96 \text{ yr}^{-1}$  (above 45 m) for the trona-dominated portion of the core. Relatively uniform rates were observed for much of the rest of core, which is supported by an absence of erosion surfaces and pedogenic horizons in the sedimentary sequence.

Two replicate U-series-dated samples from a chert at 10730 cm were not included in the model because the ages were too young (250.1 ka and 266.7 ka) when compared with the overlying tuff that yielded ages of  $>300 \text{ ka}$ . Although the chert samples were carefully selected to avoid late diagenetic features, a re-examination of the chert at 10730 cm showed the occurrence of chalcedony as a late stage fracture fill, which accounts for the young dates. A single  $^{14}\text{C}$  date of  $37.247 \pm 0.808 \text{ ka}$  at 4352 cm was excluded as it did not follow a monotonic sequence. However, the date is shown (labelled “1”) in Fig. 2b. An  $^{40}\text{Ar}/^{39}\text{Ar}$  date of  $660 \pm 37 \text{ ka}$ , at 15100 cm, was excluded from the model as it was based on a single crystal. However, it falls within the 95% probability range and is labelled “2” in Fig. 2b.

### 3. Radiocarbon dating

Radiocarbon analyses were carried out at the University of Arizona AMS facility on trona, bulk organic matter, the humate fraction of bulk organic matter and charred particles (Table S2). Two calibrated ages of 13,706 y. B.P. and 37,247 y. B.P. were obtained, with the former incorporated into the chronological model and the latter excluded, but shown in Fig. 2b, as it was younger than a U-series date just above. Other  $^{14}\text{C}$  results were problematic, including an ultramodern (post-bomb)  $^{14}\text{C}$  value for AA106870 that represents a root fragment contamination. Analyses of bulk organic matter gave unreliable results and in one case appears to have been contaminated by modern carbon (roots). The single trona date appears to reflect the age of Na-CO<sub>3</sub> brine formation rather than a depositional age. Charred particles are rare throughout the upper portion of MAG14-2A and were very small (imprecise  $\delta^{13}\text{C}$  corrections), thus providing only minimal ages.

### 4. U-series dating

U-series dating was carried out on chert (Table S3), ~0.02 g each, that had been selected in order to avoid materials with signs of late stage diagenesis or replacement. Preparation and subsampling were conducted

at the Department of Earth Sciences, National Cheng-Kung University and the U-Th isotopic analyses were performed at the High-Precision Mass Spectrometry and Environment Change Laboratory (HISPEC), Department of Geosciences, National Taiwan University, respectively. Chert was totally dissolved with HF-HNO<sub>3</sub>-HClO<sub>4</sub> digestion in the presence of a triple spike, <sup>229</sup>Th-<sup>233</sup>U-<sup>236</sup>U. Procedures for chemical separation and purification have been described previously (3). A triple-spike, <sup>229</sup>Th-<sup>233</sup>U-<sup>236</sup>U, isotope dilution method was employed to correct for mass bias and to determine U-Th isotopic compositions and contents on a Thermo-Fisher NEPTUNE multi-collection inductively coupled plasma mass spectrometer (MC-ICP-MS) (4). Half-lives of U-Th nuclides used are listed by Cheng et al. (5). Uncertainties in the U-Th isotopic data and U-series dates, are given at the two-sigma (2σ) level or two standard deviations of the mean (2σ<sub>m</sub>). Replicate samples gave consistent results.

### 5. <sup>40</sup>Ar/<sup>39</sup>Ar dating

The <sup>40</sup>Ar/<sup>39</sup>Ar dating method was used to date 11 discrete samples. Nine of these were from a tuffaceous interval from ~96–101 mbs, one from ~151 mbs, and the final sample was from near the bottom of the core in a ‘basement’ trachyte flow (presumed equivalent to the regionally prominent Magadi Trachyte flood lava). For greater statistical power in assessing age distributions, the samples from ~96–101 mbs have been combined into four separate groups. Sample ‘MAG14-2A-045Y-2 000-021’ is an altered pumiceous tuff, separated from material deeper in the core sequence by breccia and bedded tuff units, and is assigned to Group #1. The remaining core sections to depth ~101 mbs, although variable in grain size and other features, are massive tuffs without clear breaks, and so are grouped simply by core segment into Groups 2 through 4 downward in the core. Sample ‘HSPDP-MAG14-2A-68Y-2’ comprises Group 5, and ‘MAG14-2A-102Q-1 104-119,’ a trachyte lava from near the bottom of the core, is Group 6 (Table S4).

Preparation of the mineral separates for dating involved gentle disaggregation in water, rinsing through a 90-micron sieve bag (saving fines for other analyses), dilute (5% HF) and ultrasonic washing, sieving, and hand-picking to obtain the most inclusion-free phenocrysts. The purified mineral separates (200–1,500 microns) were then placed in individual positions of a circular ring of wells drilled in an aluminum disk, with a flux monitor (age standard) situated at the cardinal points of the ring. Four separate irradiations were performed, each for 0.5 hr in the Cd-lined, in-core CLICIT facility of the Oregon State University TRIGA reactor. The monitor mineral used was sanidine from the Alder Creek Rhyolite of California, with an astronomically calibrated reference age of 1.1848 ± 0.0006 Ma (6). Reactor-induced isotopic production ratios for these irradiations were: (<sup>36</sup>Ar/<sup>37</sup>Ar) Ca = 2.65 ± 0.02 × 10<sup>-4</sup>, (<sup>38</sup>Ar/<sup>37</sup>Ar) Ca = 1.96 ± 0.08 × 10<sup>-5</sup>, (<sup>39</sup>Ar/<sup>37</sup>Ar) Ca = 6.95 ± 0.09 × 10<sup>-4</sup>, (<sup>37</sup>Ar/<sup>39</sup>Ar) K = 2.24 ± 0.16 × 10<sup>-4</sup>, (<sup>38</sup>Ar/<sup>39</sup>Ar) K = 1.220 ± 0.003 × 10<sup>-2</sup>, (<sup>40</sup>Ar/<sup>39</sup>Ar) K = 2.5 ± 0.9 × 10<sup>-4</sup>. Atmospheric <sup>40</sup>Ar/<sup>36</sup>Ar = 298.56 ± 0.31 (7) and decay constants are those of reference (8).

Following irradiation and several weeks of radiological “cooling,” individual phenocrysts were dated by the single-crystal incremental heating (SCIH) <sup>40</sup>Ar/<sup>39</sup>Ar laser degassing method (Table S4). In the SCIH technique, individual phenocrysts are incrementally heated in 3–8 steps (depending on grain size and gas yield) at progressively increasing power to fusion. A total of 632 steps on 170 grains were analyzed. After the first or second low-power step, 84 of these grains were rejected as obvious older xenocrysts (e.g., reliable analyses as old as ~130 Ma, but most <10 Ma), while the remaining 86 grains were carried to completion (total extraction of gas). All analyses were performed at the Berkeley Geochronology Center using a multi-collector, ion-counting Nu Instruments Noblesse noble-gas mass spectrometer. Further details of the dating procedure can be found in reference (9).

### Results

Apparent age plateaus were identified in 66 out of 86 of the incremental heating experiments that were carried to completion (Table S5). A ‘plateau’ is taken as a set of contiguous steps encompassing the

greatest percent of  $^{39}\text{Ar}$  release that exhibit an acceptable MSWD (‘mean square weighted deviation’) with a threshold probability  $>95\%$  that the observed scatter is due to analytical error alone and not geological factors. A plateau must comprise at least 50% of the total  $^{39}\text{Ar}$  release and consist of at least four consecutive steps. Note that this last requirement is a departure from commonly used plateau definitions, which requires only three consecutive steps. This higher threshold is employed to avoid the potential for error underestimation associated with ‘three-point’ isochrons in the subsequent treatment, in which the plateau steps are regressed in isotope correlation diagrams ( $^{36}\text{Ar}/^{40}\text{Ar}$  vs.  $^{39}\text{Ar}/^{40}\text{Ar}$ , known as ‘inverse isochrons’) to determine a final age. The isochron age result is preferred over the plateau age, as the former accommodates departures from the assumption that the trapped internal non-radiogenic argon in the crystal is of atmospheric composition. The isochron ages derived from the plateau steps are displayed as age-probability density spectra in Figure S1. Aside from some obvious outliers that are readily excluded as xenocrysts or altered grains (i.e., grains outside the bulk of the distribution by more than 200 ka), the distributions are either quasi-symmetric (Groups 3, 4, and 6), or skewed toward older ages (Groups 1 and 2). The older tails exhibited by this latter group, and hinted at by some of the quasi-symmetric group, are likely the result of variable amounts of excess  $^{40}\text{Ar}^*$  (radiogenic  $^{40}\text{Ar}$ ) in some crystals. Young outliers, on the other hand, are either due to analytical variation or cryptic alteration. The quasi-symmetrical groups are treated with a robust outlier-trimming procedure, eliminating grains  $>2$  nMad (‘normalized median absolute deviations’) from the median (10), whereas the skewed distributions are treated with an algorithm that identifies the youngest group in which the MSWD is attributable to analytical error alone at the 95% confidence level.

The result for the clustered set of Groups 1–4 is an age range from  $316.0 \pm 1.4$  ka ( $2\sigma$  modified standard error, equal to the standard error times the square root of the MSWD where  $\text{MSWD} > 1$ ) for the uppermost sample in the core, to  $354.1 \pm 8.2$ ,  $354 \pm 24$ , and  $329 \pm 17$  ka for the successively older groups in this cluster (Groups 2, 3, and 4, respectively). The age of Group 2 ( $354.1 \pm 8.2$ ) and Group 4 ( $329 \pm 17$ ) are statistically distinct at the 95% confidence interval, and represent an age inversion (older age stratigraphically above a younger age). As shown in Figure S1, Group 2 is noticeably skewed, and despite trimming procedures intended to minimize the effects of the older tail, likely remains too old. Deeper in the core, at 151 msl, only one grain from Group 5 (sample ‘HSPDP-MAG14-2A-68Y-2’) yielded a stratigraphically reasonable and relatively precise age at  $660 \pm 37$  ka; as this age is supported by only one experiment, the result should be used circumspectly and was not incorporated in the Bacon age modeling. Finally, Group 6 at the base of the core (‘Magadi trachyte’, sample ‘MAG14-2A-102Q-1 104-119’) yielded  $1078.2 \pm 3.6$  ka.

## 6. Paleomagnetism

### *Sampling*

A total of 302 samples from MAG14-2A were sampled at the LacCore facility in Minneapolis, including 279 standard paleomagnetic samples and 23 hand samples. All encountered lithologies were collected except for salt and chert or where the sediments were too fractured by the drilling process. “Disking” in some core segments was observed indicating that (parts of) some core segments had rotated with respect to adjacent intervals during drilling. Sample positions within each core segment were measured with  $< 0.5$  cm precision. The top of the core segment was marked on each sample. Individual samples were recovered by gently pressing cylindrical perspex cups, with standard paleomagnetic sampling dimensions (25 mm diameter, 22 mm length), into the sediment. Hand samples were either directly lifted from the core or sawed to a manageable size. Directly after labelling the samples were wrapped in airtight cellophane and stored at temperatures below  $5^\circ$  Celsius.

### *Demagnetization, ChRM directions and reorientation of ChRM directions and magnetostratigraphy*

Stepwise progressive alternating field (AF) and thermal (TH) demagnetization of the natural remnant magnetization (NRM) was performed on a total of 301 samples at the Fort Hoofddijk Paleomagnetic laboratory of Utrecht University (The Netherlands). AF demagnetization was done in 15 alternating field steps (0, 5, 10, 15, 20, 25, 30, 35, 40, 50, 60, 70, 80, 90 and 100 mT) using the robotized 2G DC-SQUID magnetometer with in-line AF demagnetization. During the demagnetization process, the samples stayed in a shielded room. Thermal demagnetization was done up to 550° Celsius, using an ASC thermal demagnetizer (model TD48-SC, residual field < 20 nT) in 13 steps (20, 75, 100, 125, 150, 200, 250, 300, 350, 400, 450, 500 and 550). After each step the remaining NRM was measured with a 2G Enterprises horizontal DC-SQUID magnetometer. NRM intensities were typically several orders of magnitude higher than the instrument sensitivity ( $\sim 3 \times 10^{-12} \text{ Am}^2$ ).

The results of the demagnetization were interpreted to identify the various components using paleomagnetism.org, an open source on-line platform for paleomagnetic data analysis (11). ChRM directions were calculated by using a minimum of four consecutive steps. Paleomagnetism.org uses a suite of techniques to statistically interpret the paleomagnetic results (12–16). Recovering polarity orientations in drilled cores near the equator is a major challenge because the inclination for both normal and reversed polarity is similar (very shallow, varying around zero degrees), whereas declinations cannot be determined since the core is not azimuthally oriented. Because of the nature of the Lake Magadi sediments (mainly unconsolidated) drilling under an angle was not possible. As a result, the use of the Anisotropy of the Magnetic Susceptibility (AMS) as a possible method for reorientation of the core was not possible. Hence, the only method that remains available for reorientation is the occurrence of a viscous present day overprint (17). If the low temperature/low coercive (LT/LC) component can be taken as a recent viscous remnant magnetization (VRM), we can align this LT/LC component North. If it is possible to determine a high temperature/high coercive (HT/HC) component, this is either parallel to the LT/LC component – meaning normal polarity – or antiparallel – meaning reversed polarity.

### *Results and Discussion*

Of the 301 demagnetized samples, 188 were of sufficient quality that both a LT/LC component and a HT/HC component could be determined (Table S6). Of 7 samples, the LT/LC and HT/HC components cannot be clearly separated, but they show a great circle (Fig. S2 and Table S7). The Zijdeveld diagrams indicate a LT/LC component up to 15 mT/125–300°C. We consider the HT/HC component the characteristic remnant magnetization (ChRM) and it is identified between 20 and 50 mT (occasionally up to 80 mT) and 150–500 °C. See Fig. S2 for typical examples of Zijdeveld diagrams for Core MAG14-2A.

The LT/LC components are used for reorientation of the samples (18). The recalculated ChRM directions are plotted in Fig. S3. ChRM directions with Maximum Angular Deviation (MAD) < 15° are plotted as black circles. Samples showing clear great circles and MAD < 15° are plotted as black diamonds; these samples have been given an assigned declination of 180 degrees with 0 degrees inclination. White circles represent reoriented samples with ChRM directions with MAD > 15°, these have not been included in the interpretation. Fig. S3 clearly shows a zone with normal paleomagnetic directions down to 174.36 mbs and further downwards a zone of reversed directions.

Because of the nature of the method used, we are not able to identify paleomagnetic samples of this core that are reversed but lack a recent normal overprint. These samples will be plotted as normal and this forces us to be conservative in our identification of the Brunhes-Matuyama boundary with an age of 0.781 Ma (19). We cannot unequivocally verify that we have identified the reversed Matuyama Chron below 174.36 mbs, but we conclude that this part of the core must be at least older than 0.781 Ma, because of

the positive identification of reversed samples in combination with the numerical ages obtained through U-series and  $^{40}\text{Ar}/^{39}\text{Ar}$  techniques (see above). However, it is worth noting that independent estimates of the depth of the Brunhes-Matuyama boundary based on extrapolation of sedimentation rate estimates are compatible with the inferred Brunhes-Matuyama boundary location (Fig. 2B) using the first positively identified reversed sample at 174.36 mbs.

The underlying trachytes have been  $^{40}\text{Ar}/^{39}\text{Ar}$  dated at  $1078.2 \pm 3.6$  ka from core segment MAG14-2A-102Q-1 at 104-119 cm. We have sampled the same core segment at 114 cm (194.09 mbs, Fig S2b) with the corresponding reversed paleomagnetic direction for this age. In the overlying sediments, we have found no indication of the Jaramillo (normal) subchron. This could indicate a small hiatus between the deposition of the trachyte and the overlying sediments of at least the duration of the Jaramillo subchron.

At two intervals (32.51–32.61 mbs and 99.21–99.92 mbs; Table S6) we find samples that could indicate a possible paleomagnetic excursion. However, with only two samples at each interval we refrain from assigning these directions to an excursion. The loss of remanence below 400 degrees in some of the samples does indicate that greigite is one of the magnetic minerals present in the Magadi sediments (20). No gyroremanent magnetization (GRM) was observed, which could indicate that the greigite (if proven to be present) could be of biogenic origin (21). Hematite likely has a negligible contribution in these samples as all TH demagnetized samples had fully decayed at 550°C whereas only a few samples had some remanence left at 100 mT, which could indicate greigite.

## 7. Geochemical analyses

Samples were analyzed by Activation Laboratories using their 4E-exploration package. Samples were fused with lithium metaborate and lithium tetraborate for inductively coupled plasma-mass spectrometry for element determinations. Analyses were carried out on a Thermo Jarrell-Ash ENVIRO II ICP. Detection limits for  $\text{Na}_2\text{O}$ , and  $\text{CaO}$  were 0.01%. Samples for LOI analyses at 1,000°C were carried out by Actlabs after initial dewatering at 105°C, yielding total volatiles (mainly trona, calcite and organics). LOI at 550°C ( $n = 332$ ) was determined at the University of Arizona with standard furnace ignition techniques and represents total organic carbon. Mineralogical results were obtained using XRD equipment at Georgia State University on samples collected at 16 cm intervals using a Panalytical X'pert Pro MPD with  $\text{CuK}\alpha$  radiation operating at 45 kV and 40mA. Data are shown in Table S8.

## 8. Microfossil analyses

A total of 62 diatom taxa were observed in 354 samples from the Magadi core (Dataset S1). Carbonates were extracted with HCl (10%) and organics were removed with  $\text{H}_2\text{O}_2$  (30%). After cleaning with distilled water, diatoms were mounted on smear slides using Naphrax. Fig. S4 shows the stratigraphic distribution of diatoms in MAG14-2A. Zones I and VI lack diatoms. Zone II includes relatively low abundances of diatoms dominated by *Aulacoseira* spp. and *Cyclotella meneghiniana*. Zone III is more diverse with *Aulacoseira* spp. common to abundant and with saline benthic and planktonic species increasing. Zone IV is distinguished by increased *A. agassizi*. Zone V is the most diverse and is characterised by increased percentages of *Thalassiosira faurii* and *Cyclotella meneghiniana*. Note the common co-occurrence of fresh and saline taxa through the core. Diatom identifications follow standard works (22–24).

Pollen was prepared following standard procedures (25, 26). Two sets of fossil pollen sums were calculated. The first consists of local taxa comprising Poaceae and wetland taxa (Cyperaceae, *Hydrocotyle*, *Potamogeton* and *Typha*) minus regional taxa or land pollen. Poaceae was considered as

local because of a combination of their dominance (local over-representation) among the fossil pollen and the numerous grasses growing in the Magadi catchment today. The second fossil pollen sum includes regional taxa or land pollen with unknown grains included. Pollen types that did not exceed 2 % in at least one sample were excluded from the pollen diagram. The full pollen stratigraphy is shown in Figs. S5–6 with percentage analyses shown in Dataset S2. Identification was based on standard works (27–29), digital photographs available in the African Pollen Database (<http://www.geo.arizona.edu/palynology/apd.html>), and by comparison with a reference collection of over 6000 slides of modern East African pollen held at the Department of Earth Sciences (Palynology and Paleobotany section), National Museums of Kenya.

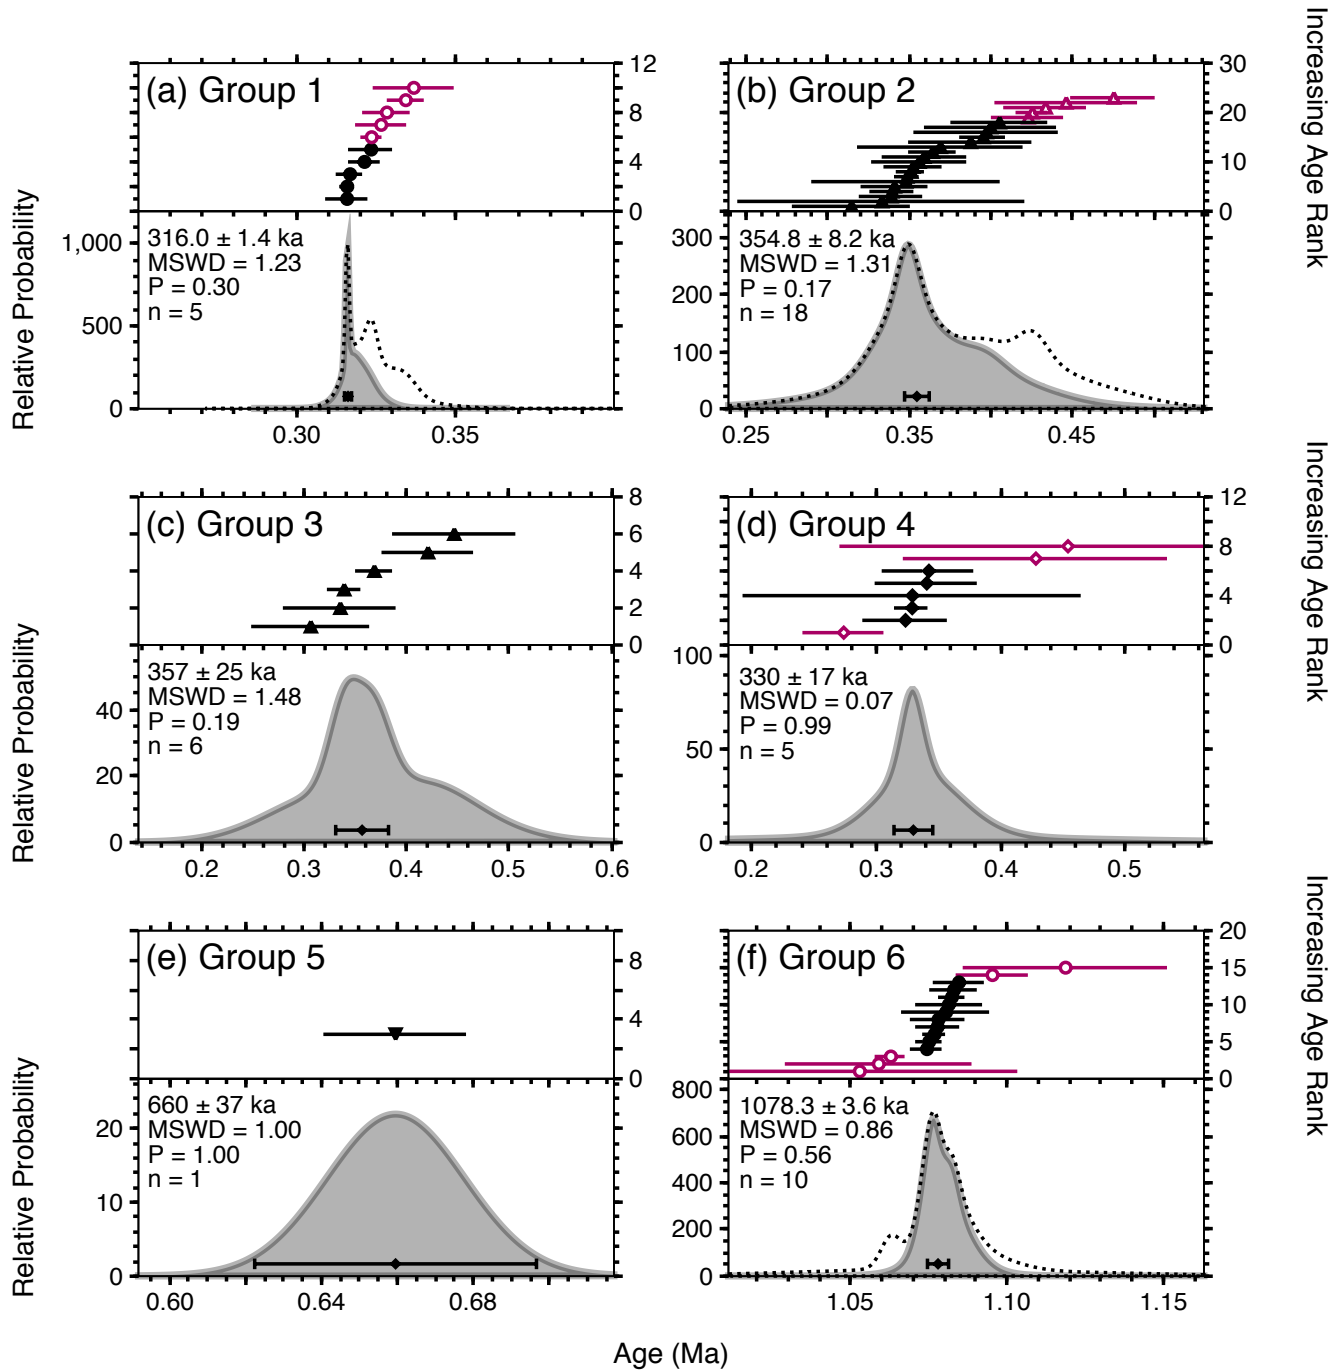

**Fig. S1.** Age-probability density spectra of the isochron results for the SCIH analyses. Filled curve represents the trimmed data set after outlier deletion procedures described in the text, whereas the dashed areas represent the overall measured age-probability density. The weighted-mean ages of the juvenile population is shown at  $2\sigma$  MSE, and includes the error in  $J$ , the neutron fluence parameter. ‘MSWD’ is the mean square of weighted deviations, with an expectation of unity; ‘P’ expresses the probability that the MSWD is fully explained by analytical scatter; if below 5%, geological scatter or error underestimation may be present. The upper panel is a rank-order plot of individual analyses with  $1\sigma$  analytical uncertainty. Closed symbols in this plot represent analyses included in the mean, while open symbols depict excluded grains.



a)

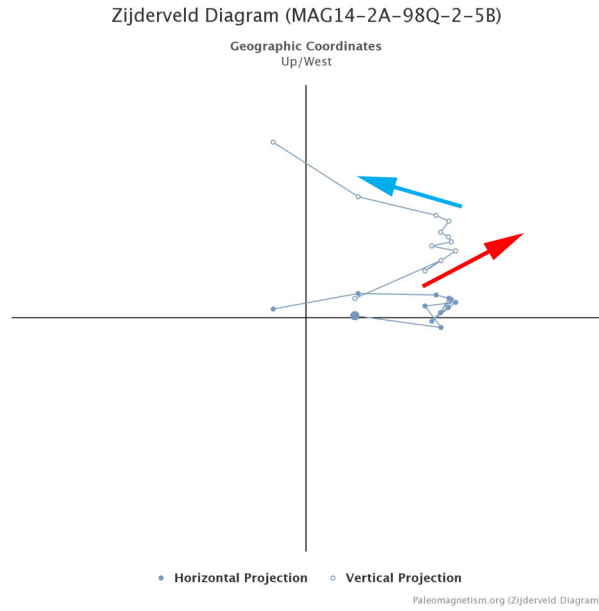

b)

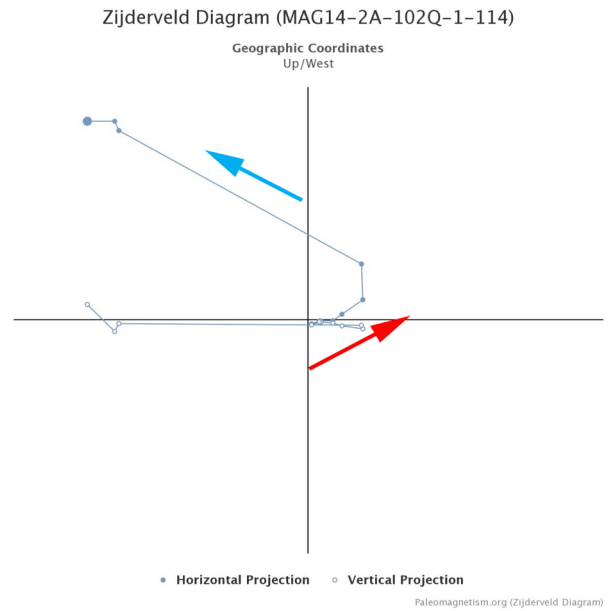

c)

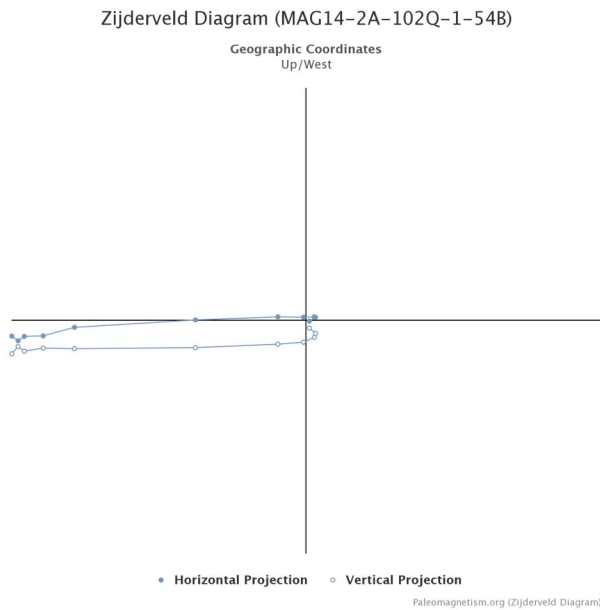

d)

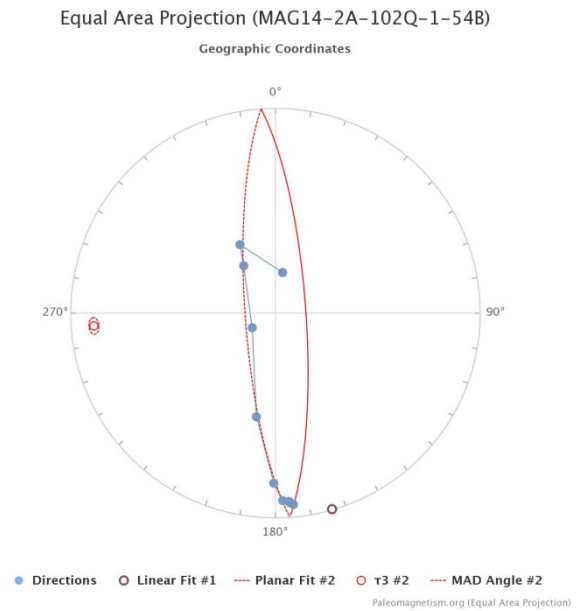

**Fig. S2.** Examples of typical Zijderveld (1967) diagram for two samples (a, b) with reversed ChRM (red arrow) after reorientation of the low temperature overprint to normal directions (blue arrow) and one example of a sample which shows a great circle and for which the two directions could not be fully separated (c, d) Closed/open circles denote projection on a horizontal/vertical plane.

# Magadi

## ChRM directions

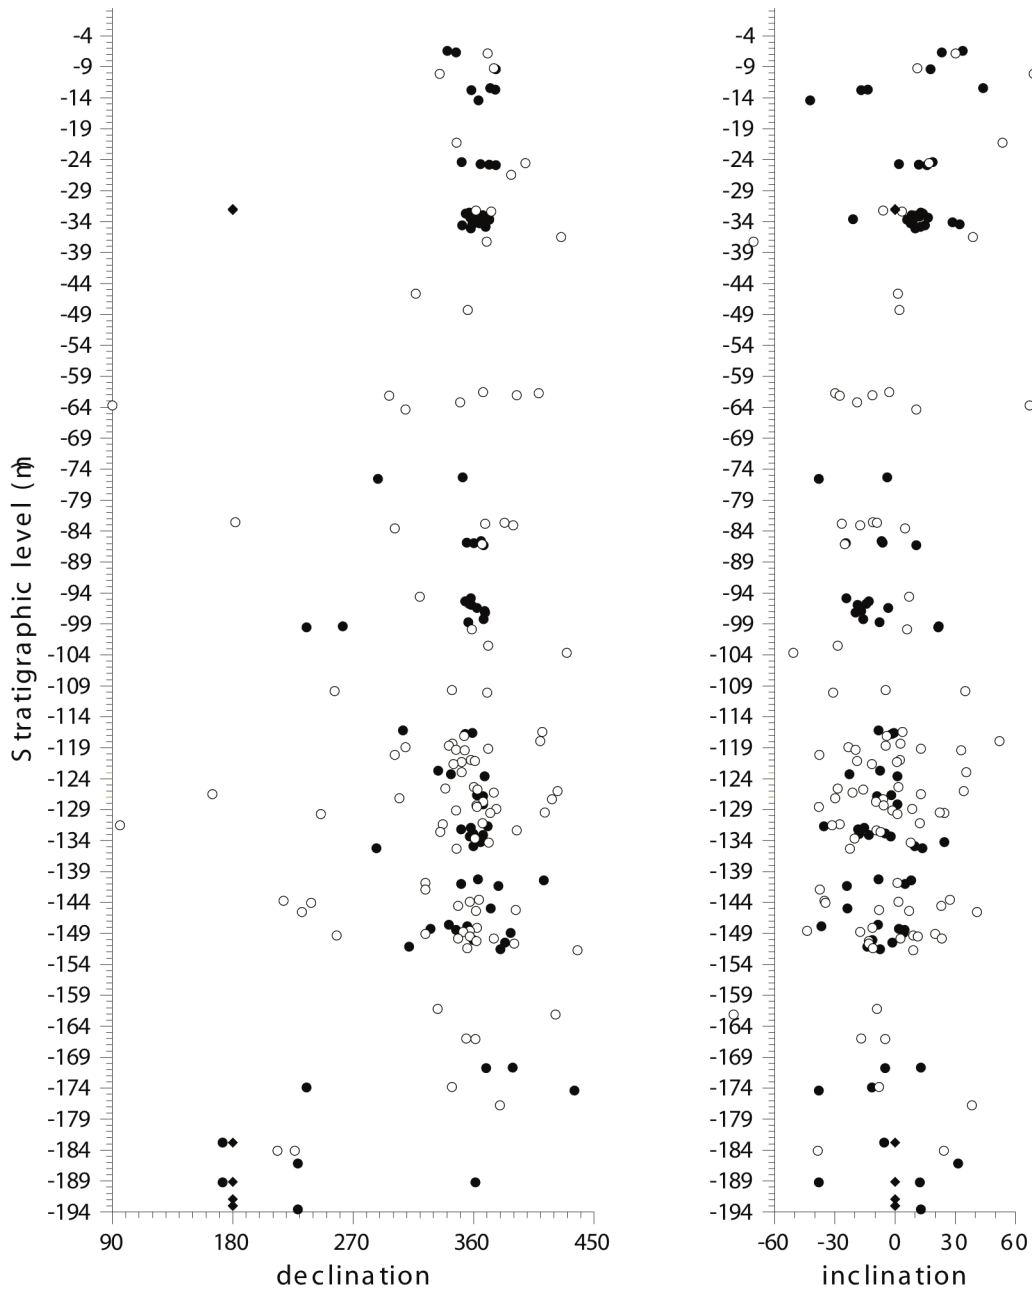

**Fig. S3.** Plotted LC/LC corrected ChRM directions of the Magadi 2A core. White dots are ChRM directions with MAD higher than 15 degrees and were not used for the interpretation. Black dots are ChRM directions with MAD lower than 15 degrees. See SI text for further explanation.

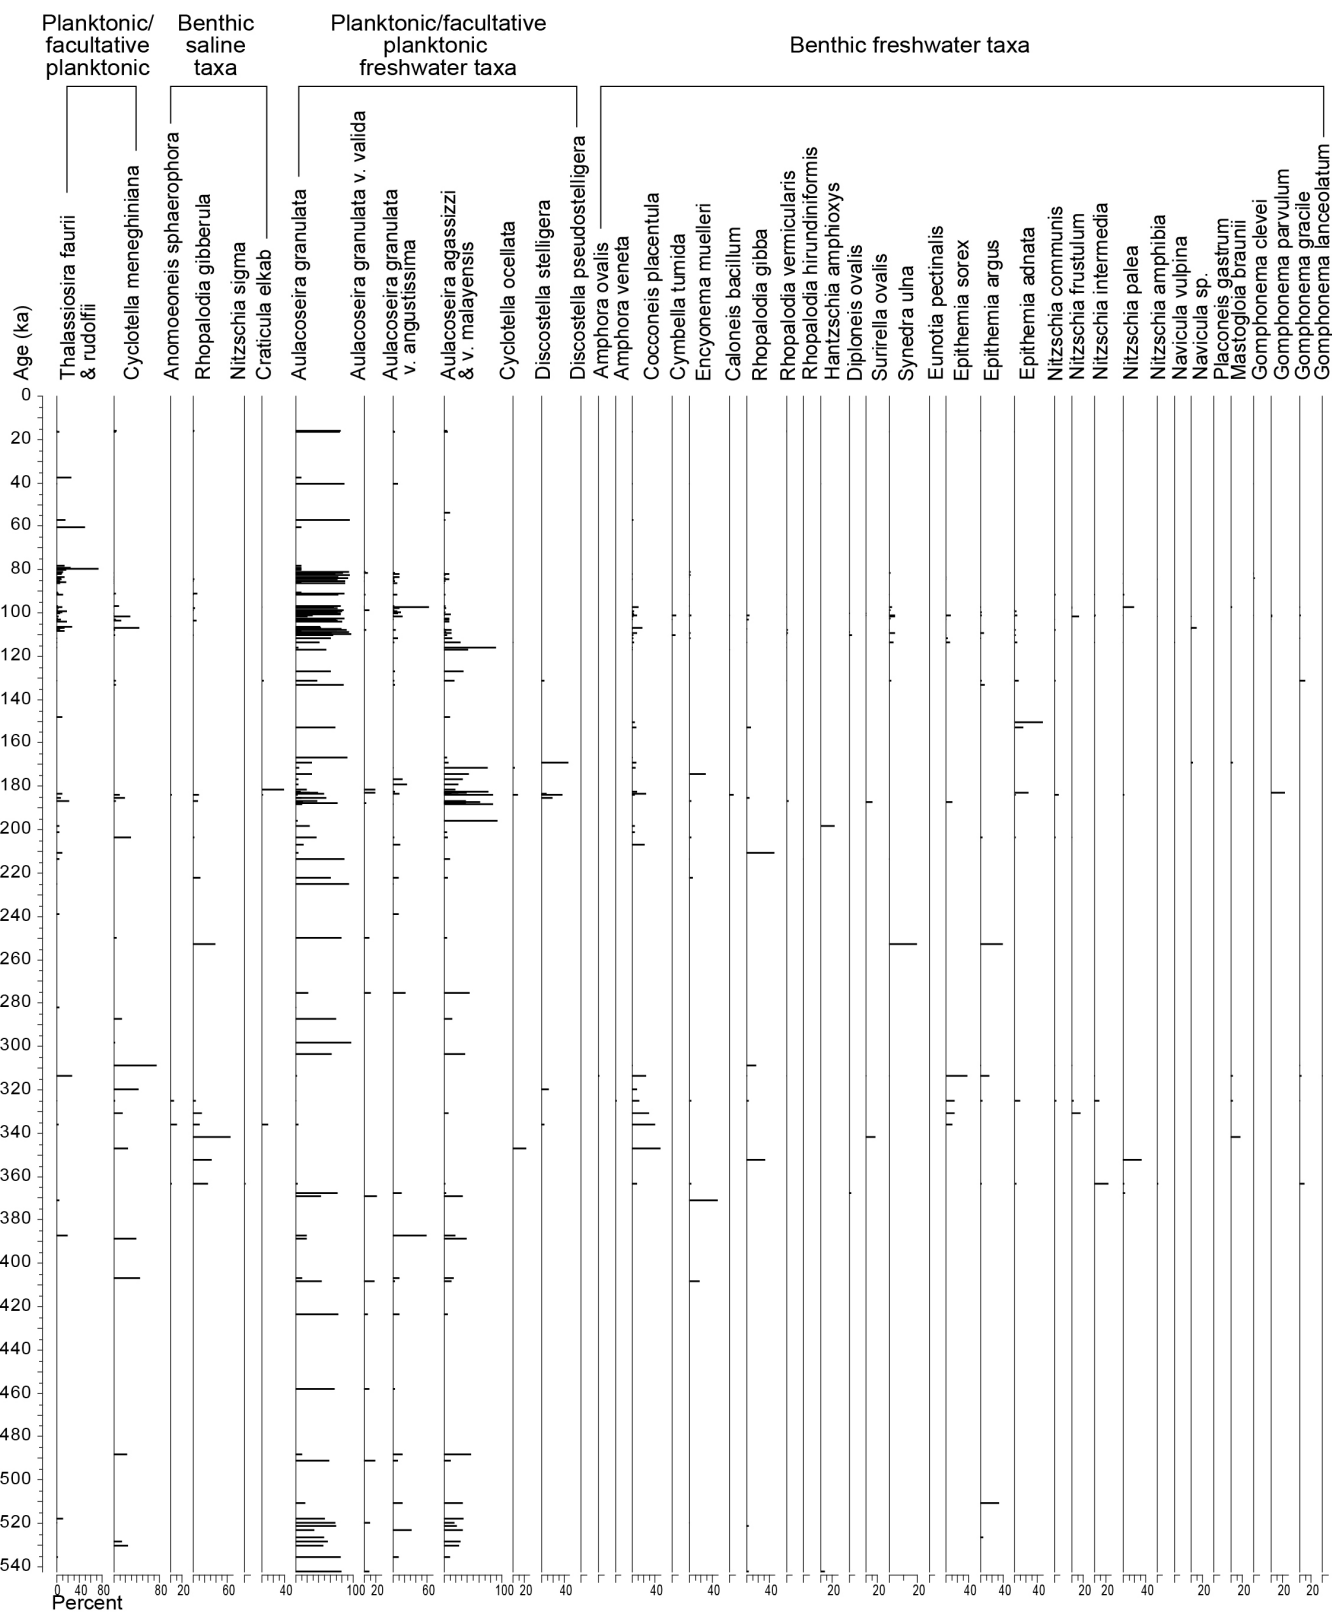

**Fig. S4.** Diatom stratigraphy of MAG14-2A for taxa forming >2% showing six major zones. Note time gap below about 475 ka.

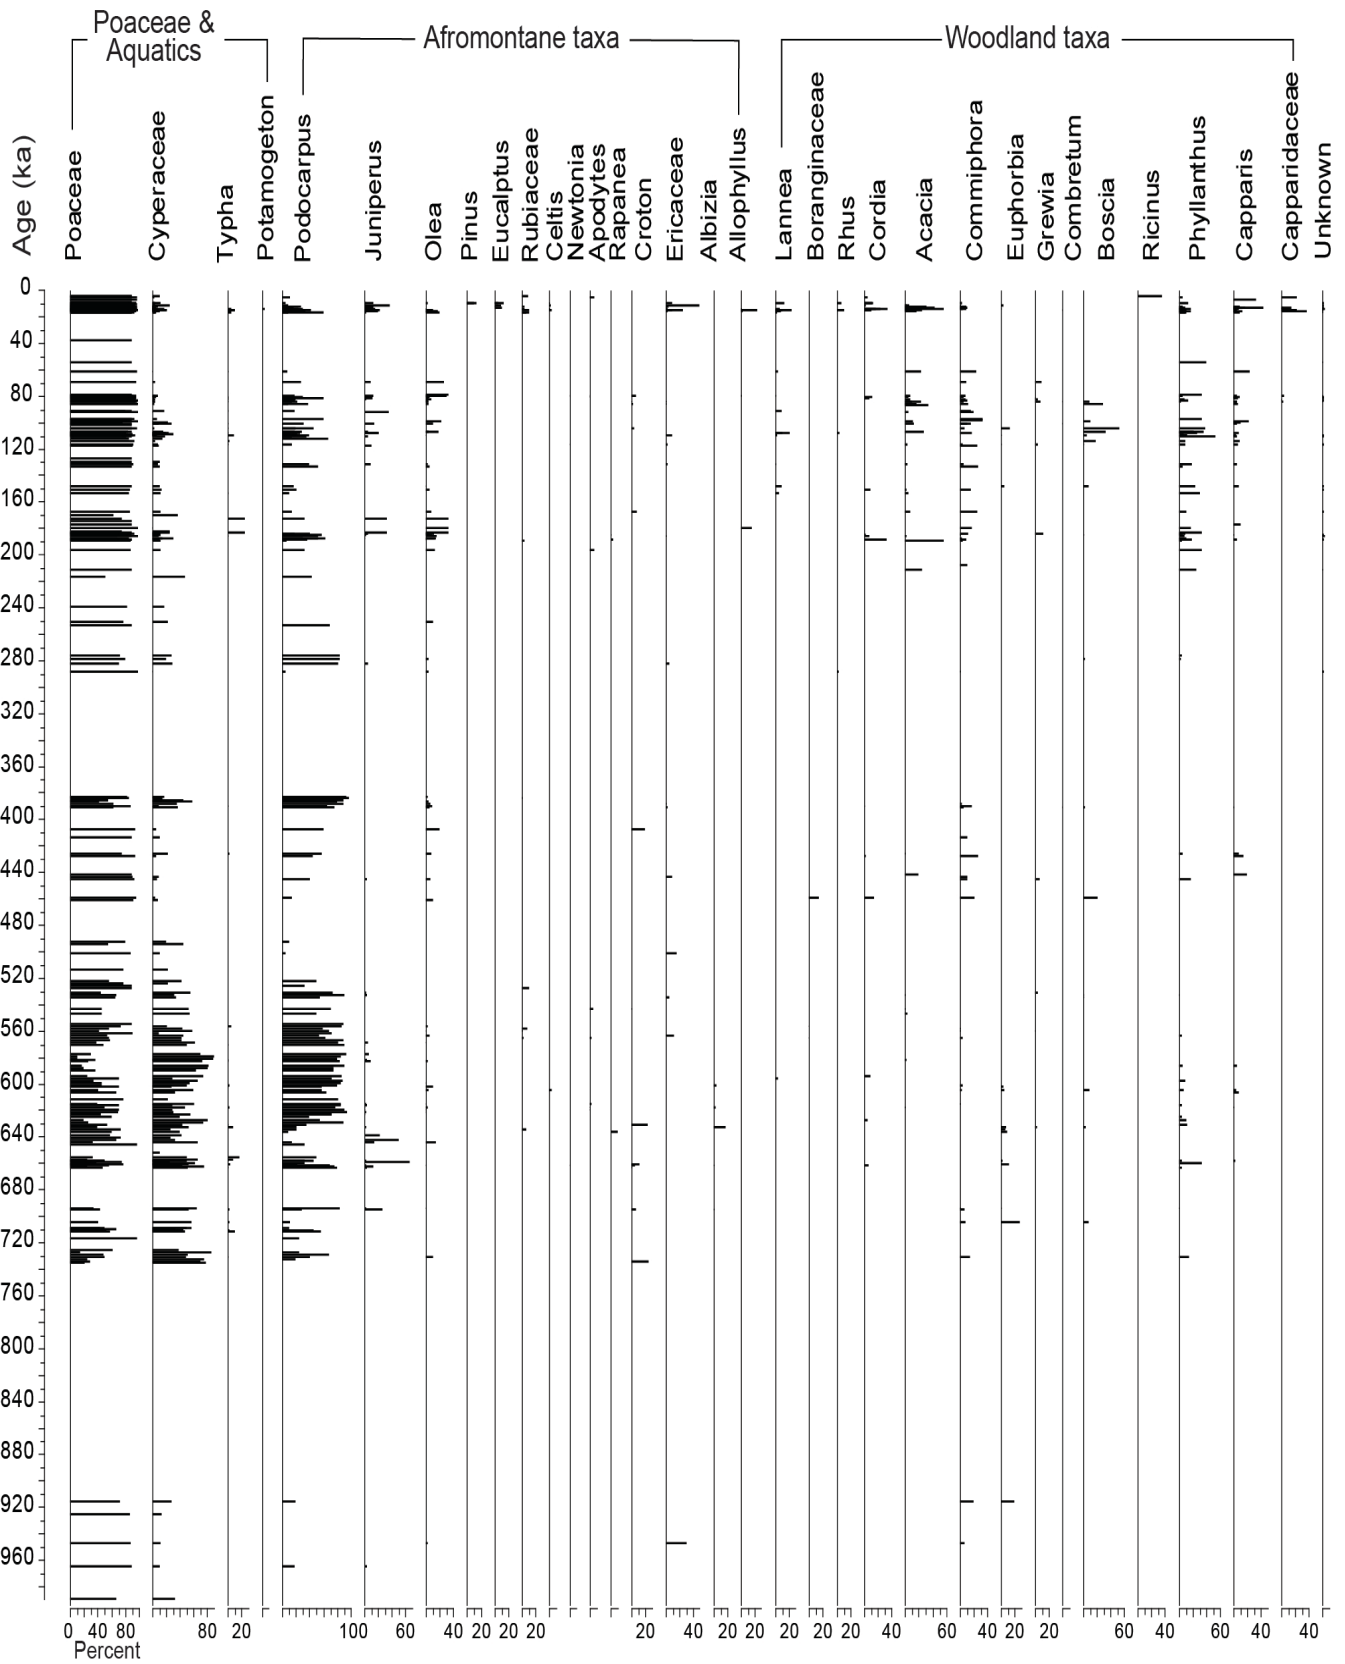

**Fig. S5.** Pollen stratigraphy vs depth in MAG14-2A. Poaceae and aquatics, Afromontane and woodland taxa. Taxa forming <2% not included.

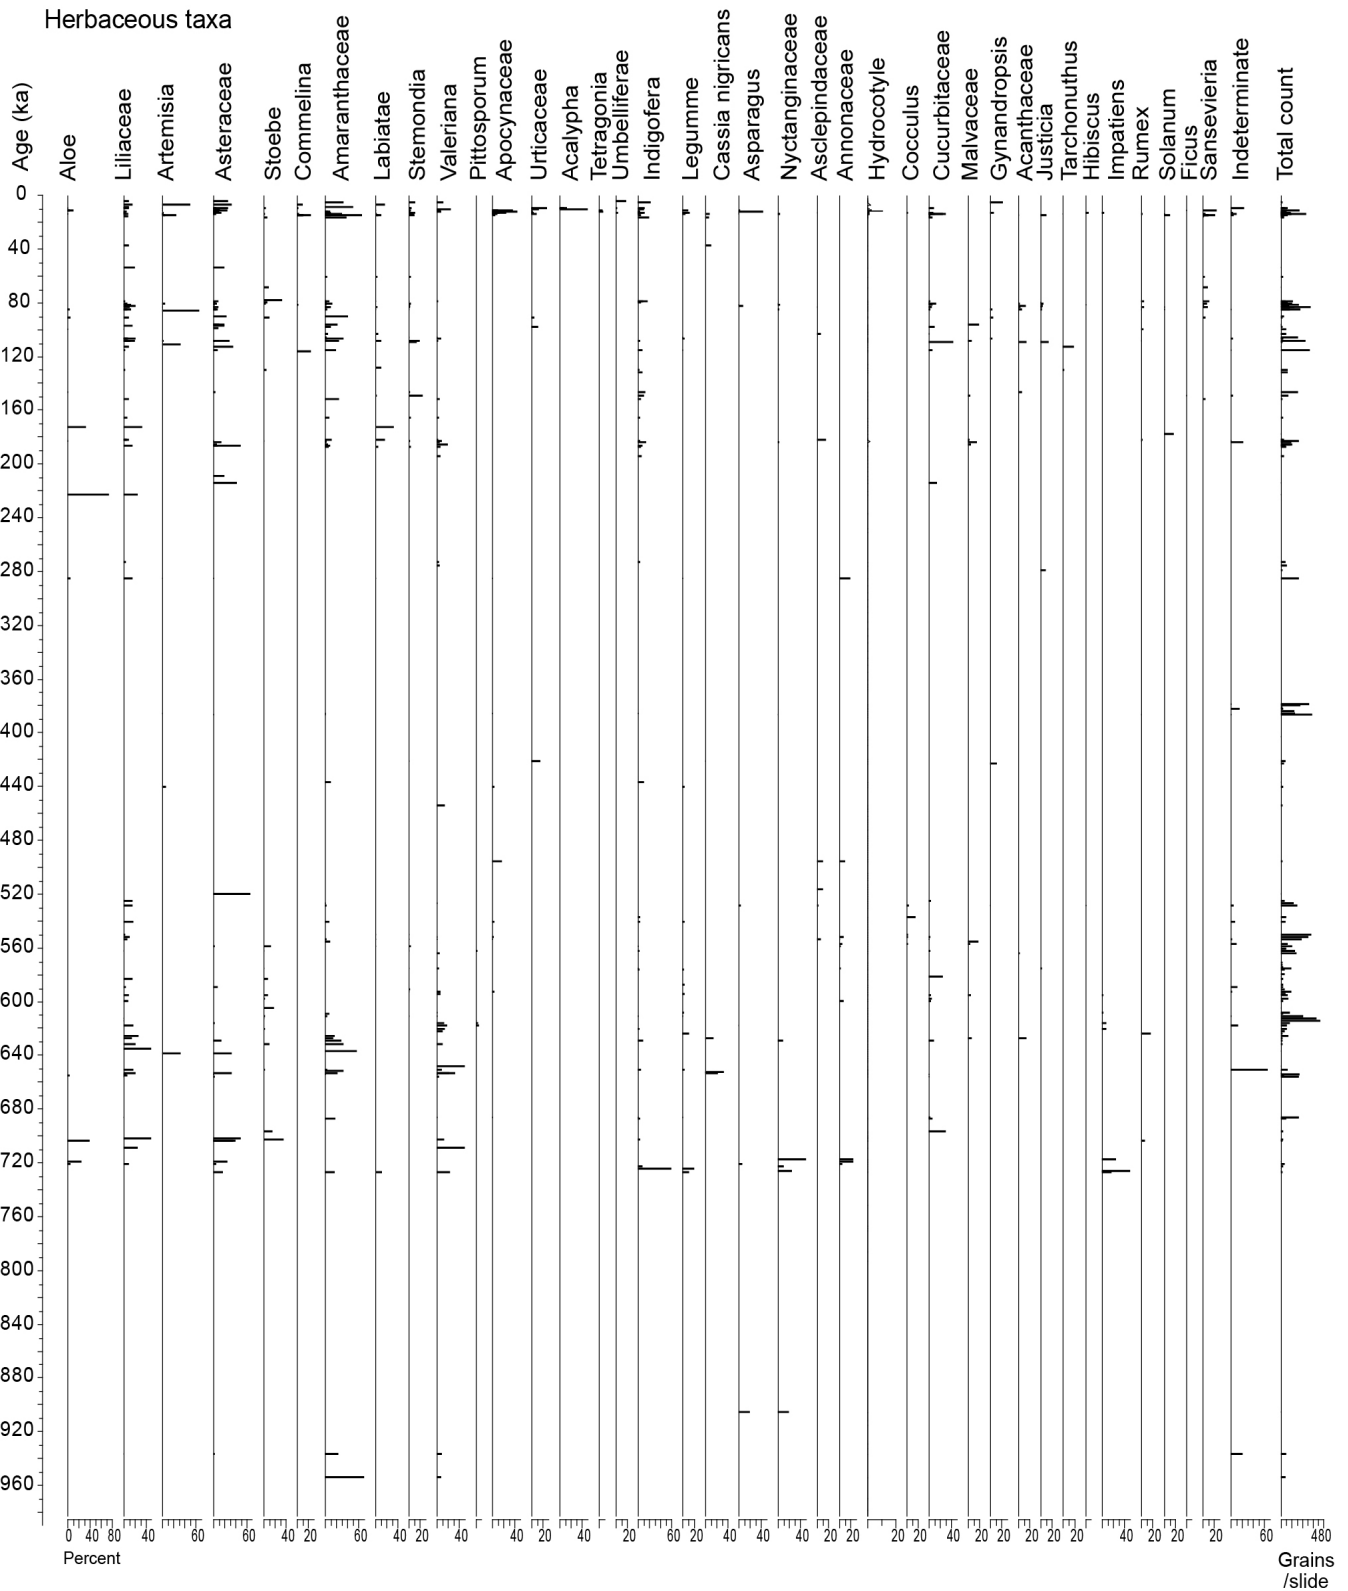

**Fig. S6.** Pollen stratigraphy vs depth in MAG14-2A. Herbaceous taxa only. Taxa forming <2% not included.

**Table S1 Control dates used in Bayesian chronological model**

| <b>Date (ka)</b> | <b>Error (ka)</b> | <b>Depth (cm)</b> | <b>Method</b> |
|------------------|-------------------|-------------------|---------------|
| 13.706           | 0.127             | 2018.5            | 14C           |
| 12.4             | 0.8               | 3580              | U-series      |
| 45.7             | 1                 | 4188              | U series      |
| 114              | 2.2               | 6389              | U series      |
| 113.2            | 1.6               | 6389              | U-series      |
| 97.4             | 2.5               | 6570              | U series      |
| 101              | 1.9               | 6570              | U series      |
| 155.1            | 3.6               | 7066              | U series      |
| 163.6            | 2.6               | 7066              | U series      |
| 158.8            | 2.8               | 7066              | U series      |
| 179.7            | 3.5               | 8381              | U series      |
| 215.8            | 8.6               | 8766.5            | U series      |
| 266.5            | 16.5              | 9100              | U series      |
| 251.8            | 10.8              | 9100              | U series      |
| 316              | 1.4               | 9609              | 40Ar/39Ar     |
| 354.1            | 8.2               | 9667              | 40Ar/39Ar     |
| 354              | 24                | 9723              | 40Ar/39Ar     |
| 329              | 17                | 9737              | 40Ar/39Ar     |
| 781              | 10                | 17436             | B-M boundary  |
| 1078.2           | 3.6               | 19450             | 40Ar/39Ar     |

**Table S2.** Radiocarbon dates from MAG14-2A.

| Number   | mblf  | material                          | Mass (mg) | delta C13 | F(d13C) | +/-F(d13C) | C14 y BP  | +/-C14 age | Calibrated age | Calibrated +/- 1 sigma | 68% confidence range Cal yr BP | Notes |
|----------|-------|-----------------------------------|-----------|-----------|---------|------------|-----------|------------|----------------|------------------------|--------------------------------|-------|
| AA105612 | 7.056 | bulk organic                      | 0.71      | -24.9     | 0.2640  | 0.0015     | 10699     | 45         | 12692          | 47                     | 12644-12739                    | 1     |
| AA105612 | 7.056 | humate fraction from above        | 0.3       | -28.1     | 0.2317  | 0.0025     | 11747     | 86         | 13629          | 148                    | 13480-13777                    | 1     |
| AA105613 | 20.17 | trona                             | 1.61      | 2.8       | 0.2751  | 0.0012     | 10368     | 34         | 12301          | 175                    | 12125-12476                    | 2     |
| AA105609 | 20.19 | bulk organic                      | 1.08      | -28.3     | 0.2029  | 0.0018     | 12812     | 70         | 15309          | 262                    | 15046-15571                    |       |
| AA105609 | 20.19 | humate fraction from above sample | 0.58      | -27.8     | 0.2302  | 0.0018     | 11798     | 62         | 13706          | 127                    | 13578-13833                    |       |
| AA106870 | 25.47 |                                   | 1.54      | -13.1     | 1.0379  | 0.0047     | post-bomb |            |                |                        |                                | 3     |
| AA105610 | 43.52 | bulk organic                      | 2.5       | -28.9     | 0.0033  | 0.0010     | 45900     | 2400       | 49868          | 3174                   | 46694-53042                    |       |
| AA105610 | 43.52 | humate fraction from above        | 0.79      | -28.7     | 0.0170  | 0.0010     | 32750     | 470        | 37247          | 808                    | 36438-38055                    |       |
| AA109444 | 43.69 | charred particles                 | 0.03      | -16.9     | <0.0517 |            | >23800    |            | >28691         |                        |                                | 4     |
|          | 58.86 | charred particles                 | 0.05      | -23.9     | <0.0321 |            | >27600    |            | >32126         |                        |                                | 4     |
| AA105611 | 66.03 | bulk organic                      | 1.85      | -26.3     | 0.0031  | 0.0010     | 46400     | 2600       | 50541          | 3510                   | 47030-54051                    |       |
| AA105611 | 66.03 | humate fraction from above        | 1.18      | -25.4     | 0.0305  | 0.0010     | 28050     | 260        | 32535          | 343                    | 32191-32878                    |       |

Notes: 1. Probable contamination, 2. Probably reflects brine water, 3. Modern organic matter contamination, 4. Small sample correction applied

**Table S3.** High-precision measurements of uranium- and thorium- isotopic compositions and dating of chert in drilled cores from Lake Magadi, Kenya by MC-ICPMS, Thermo Electron Neptune.

| Depth (m)     | <sup>238</sup> U (ppm)             | <sup>238</sup> U/ <sup>232</sup> Th (g/g) | <sup>234</sup> U/ <sup>238</sup> U at./at. (x 10 <sup>6</sup> ) | <sup>230</sup> Th/ <sup>232</sup> Th at./at. (x 10 <sup>6</sup> ) | <sup>234</sup> U/ <sup>238</sup> U act. ratio | δ <sup>234</sup> U (o/oo)  | <sup>230</sup> Th/ <sup>238</sup> U act. ratio <sup>c</sup> | Age (ka)                     |
|---------------|------------------------------------|-------------------------------------------|-----------------------------------------------------------------|-------------------------------------------------------------------|-----------------------------------------------|----------------------------|-------------------------------------------------------------|------------------------------|
| 35.806-35.855 | 10.7176 ± 0.0171                   | 3.05 ± 0.09                               | 59.21 ± 0.10                                                    | 5.8 ± 0.4                                                         | 1.0772 ± 0.0017                               | 77.2 ± 1.7                 | 0.116 0.007                                                 | 12.4 ± 0.8                   |
| 41.84-41.91   | 2.0538 ± 0.0026                    | 10.05 ± 0.072                             | 80.40 ± 0.11                                                    | 84.6 ± 1.7                                                        | 1.4627 ± 0.0021                               | 462.7 ± 2.1                | 0.511 0.009                                                 | 45.7 ± 1.0                   |
| 63.828-63.958 | 3.3267 ± 0.0043<br>3.1682 ± 0.0035 | 18.42 ± 0.12<br>18.74 ± 0.11              | 69.78 ± 0.11<br>69.72 ± 0.09                                    | 257.9 ± 3.3<br>261.0 ± 2.6                                        | 1.2695 ± 0.0019<br>1.2685 ± 0.0016            | 269.5 ± 1.9<br>268.5 ± 1.6 | 0.849 0.010<br>0.845 0.007                                  | 114.0 ± 2.2<br>113.2 ± 1.6   |
| 65.665-65.765 | 0.7027 ± 0.0011<br>0.6254 ± 0.0007 | 7.20 ± 0.04<br>7.24 ± 0.03                | 74.49 ± 0.15<br>74.70 ± 0.09                                    | 98.2 ± 1.7<br>101.5 ± 1.3                                         | 1.3551 ± 0.0027<br>1.3590 ± 0.0016            | 355.1 ± 2.7<br>359.0 ± 1.6 | 0.827 0.014<br>0.850 0.010                                  | 97.4 ± 2.5<br>101.0 ± 1.9    |
| 70.63-70.69   | 0.8063 ± 0.0016                    | 8.19 ± 0.05                               | 70.10 ± 0.16                                                    | 136.2 ± 1.7                                                       | 1.2753 ± 0.0029                               | 275.3 ± 2.9                | 1.008 0.011                                                 | 155.1 ± 3.6                  |
| 70.63-70.69   | 0.7391 ± 0.0008                    | 14.82 ± 0.04                              | 69.84 ± 0.10                                                    | 251.4 ± 1.9                                                       | 1.2705 ± 0.0018                               | 270.5 ± 1.8                | 1.029 0.007                                                 | 163.6 ± 2.6                  |
| 70.63-70.69   | 0.7474 ± 0.0015                    | 15.96 ± 0.07                              | 70.28 ± 0.15                                                    | 269.1 ± 2.4                                                       | 1.2786 ± 0.0028                               | 278.6 ± 2.8                | 1.022 0.008                                                 | 158.8 ± 2.8                  |
| 83.64-83.99   | 2.8016 ± 0.0048                    | 27.66 ± 0.14                              | 65.82 ± 0.13                                                    | 456.8 ± 4.1                                                       | 1.1975 ± 0.0024                               | 197.5 ± 2.4                | 1.002 0.008                                                 | 179.7 ± 3.5                  |
| 87.65-87.68   | 1.5932 ± 0.0021                    | 4.33 ± 0.04                               | 68.72 ± 0.09                                                    | 80.7 ± 1.3                                                        | 1.2502 ± 0.0017                               | 250.2 ± 1.7                | 1.131 0.016                                                 | 215.8 ± 8.6                  |
| 90.934-91.054 | 4.2754 ± 0.0072<br>3.4647 ± 0.0042 | 11.46 ± 0.12<br>11.55 ± 0.09              | 65.14 ± 0.13<br>65.08 ± 0.09                                    | 213.8 ± 4.0<br>212.0 ± 3.0                                        | 1.1850 ± 0.0023<br>1.1840 ± 0.0016            | 185.0 ± 2.3<br>184.0 ± 1.6 | 1.131 0.018<br>1.113 0.013                                  | 266.5 ± 16.5<br>251.8 ± 10.8 |
| 107.25-107.35 | 0.8099 ± 0.0014<br>0.8369 ± 0.0010 | 5.20 ± 0.03<br>5.37 ± 0.03                | 67.10 ± 0.13<br>66.84 ± 0.09                                    | 98.9 ± 1.3<br>103.5 ± 1.4                                         | 1.2207 ± 0.0023<br>1.2160 ± 0.0016            | 220.7 ± 2.3<br>216.0 ± 1.6 | 1.153 0.014<br>1.168 0.014                                  | 250.1 ± 10.7<br>266.7 ± 12.3 |

**Table S4.** <sup>40</sup>Ar/<sup>39</sup>Ar analytical data

| Lab ID#                                     | Watts Irrad. | J<br>(X 10 <sup>19</sup> ) ± 1σ | Relative Isotopic Abundances |                          |                          |                          |                          |                                            |                                            |                                            | Derived Results  |                                            |                                            |                                            | Inverse Isochron Data                           |        |        |        |          |          |       |       |         |         |         |         |        |        |
|---------------------------------------------|--------------|---------------------------------|------------------------------|--------------------------|--------------------------|--------------------------|--------------------------|--------------------------------------------|--------------------------------------------|--------------------------------------------|------------------|--------------------------------------------|--------------------------------------------|--------------------------------------------|-------------------------------------------------|--------|--------|--------|----------|----------|-------|-------|---------|---------|---------|---------|--------|--------|
|                                             |              |                                 | <sup>40</sup> Ar<br>± 1σ     | <sup>39</sup> Ar<br>± 1σ | <sup>38</sup> Ar<br>± 1σ | <sup>37</sup> Ar<br>± 1σ | <sup>36</sup> Ar<br>± 1σ | <sup>40</sup> Ar/ <sup>39</sup> Ar<br>± 1σ | <sup>40</sup> Ar/ <sup>39</sup> Ar<br>± 1σ | <sup>40</sup> Ar/ <sup>39</sup> Ar<br>± 1σ | Age (Ma)<br>± 1σ | <sup>36</sup> Ar/ <sup>39</sup> Ar<br>± 1σ | <sup>38</sup> Ar/ <sup>39</sup> Ar<br>± 1σ | <sup>37</sup> Ar/ <sup>39</sup> Ar<br>± 1σ | <sup>36</sup> Ar/ <sup>39</sup> Ar<br>Fr. Corr. |        |        |        |          |          |       |       |         |         |         |         |        |        |
| <i>MAG14-2A-102Q-1 104-119</i>              |              |                                 |                              |                          |                          |                          |                          |                                            |                                            |                                            |                  |                                            |                                            |                                            |                                                 |        |        |        |          |          |       |       |         |         |         |         |        |        |
| 26963-01A                                   | 1.8          | 446c                            | 0.13540                      | 0.00017                  | 101832.1                 | 139.3                    | 16261.8                  | 16.1                                       | 1989.9                                     | 23.9                                       | 148.9            | 8.1                                        | 106.9                                      | 1.9                                        | 0.26                                            | 16.3   | 0.0466 | 0.0026 | 4.3001   | ± 0.0370 | 68.7  | 1.066 | 0.009   | 0.00105 | 1.83    | 0.15975 | 0.17   | 0.0630 |
| 26963-01B                                   | 1.4          | 446c                            | 0.13540                      | 0.00017                  | 134684.9                 | 150.7                    | 25529.9                  | 21.1                                       | 318.2                                      | 16.7                                       | 232.8            | 8.1                                        | 69.3                                       | 1.8                                        | 0.40                                            | 25.6   | 0.0483 | 0.0017 | 4.6648   | ± 0.0219 | 84.7  | 1.106 | 0.005   | 0.00051 | 2.57    | 0.18963 | 0.14   | 0.0372 |
| 26963-01C                                   | 1.8          | 446c                            | 0.13540                      | 0.00017                  | 190429.0                 | 149.4                    | 42969.7                  | 23.3                                       | 515.6                                      | 22.0                                       | 348.1            | 8.2                                        | 20.0                                       | 1.5                                        | 0.68                                            | 43.1   | 0.0429 | 0.0010 | 4.2931   | ± 0.0116 | 96.9  | 1.064 | 0.003   | 0.00010 | 7.86    | 0.22349 | 0.10   | 0.0088 |
| 26963-01D                                   | 2.5          | 446c                            | 0.13540                      | 0.00017                  | 50794.6                  | 132.4                    | 11534.6                  | 13.7                                       | 95.9                                       | 22.0                                       | 91.3             | 8.1                                        | 1.3                                        | 1.6                                        | 11.6                                            | 0.0419 | 0.0038 | 4.3697 | ± 0.0442 | 99.3     | 1.083 | 0.011 | 0.00002 | 131.0   | 0.22278 | 0.29    | 0.0018 |        |
| 26963-01E                                   | 3.3          | 446c                            | 0.13540                      | 0.00017                  | 15515.8                  | 125.9                    | 3413.4                   | 7.6                                        | 30.4                                       | 22.0                                       | 28.3             | 8.0                                        | 2.1                                        | 1.5                                        | 0.05                                            | 3.4    | 0.0439 | 0.0126 | 4.3657   | ± 0.1408 | 96.1  | 1.082 | 0.035   | 0.00013 | 76.93   | 0.22008 | 0.84   | 0.0103 |
| <i>MAG14-2A-102Q-1 104-119 - Aliquot #2</i> |              |                                 |                              |                          |                          |                          |                          |                                            |                                            |                                            |                  |                                            |                                            |                                            |                                                 |        |        |        |          |          |       |       |         |         |         |         |        |        |
| 26963-02B                                   | 1.0          | 446c                            | 0.13540                      | 0.00017                  | 32315.5                  | 136.8                    | 4173.9                   | 8.7                                        | 74.6                                       | 16.4                                       | 52.3             | 8.1                                        | 51.9                                       | 1.7                                        | 0.07                                            | 2.0    | 0.0641 | 0.0100 | 4.2460   | ± 0.1292 | 53.4  | 1.052 | 0.032   | 0.00156 | 3.39    | 0.12570 | 0.46   | 0.1091 |
| 26963-02C                                   | 1.4          | 446c                            | 0.13540                      | 0.00017                  | 85079.1                  | 141.4                    | 17688.2                  | 17.4                                       | 236.6                                      | 24.9                                       | 216.0            | 8.1                                        | 29.9                                       | 1.7                                        | 0.28                                            | 8.5    | 0.0625 | 0.0024 | 4.3141   | ± 0.0296 | 89.6  | 1.069 | 0.007   | 0.00035 | 5.62    | 0.20763 | 0.19   | 0.0261 |
| 26963-02D                                   | 1.8          | 446c                            | 0.13540                      | 0.00017                  | 311733.0                 | 174.5                    | 51495.3                  | 26.0                                       | 719.9                                      | 31.4                                       | 683.2            | 8.3                                        | 303.6                                      | 2.6                                        | 0.81                                            | 24.7   | 0.0679 | 0.0008 | 4.2946   | ± 0.0156 | 71.0  | 1.064 | 0.004   | 0.00097 | 0.86    | 0.16255 | 0.08   | 0.0610 |
| 26963-02E                                   | 2.5          | 446c                            | 0.13540                      | 0.00017                  | 253307.7                 | 162.4                    | 54177.7                  | 31.0                                       | 695.4                                      | 23.9                                       | 687.0            | 8.3                                        | 56.8                                       | 1.7                                        | 0.86                                            | 26.1   | 0.0646 | 0.0008 | 4.3441   | ± 0.0102 | 93.4  | 1.076 | 0.003   | 0.00022 | 3.04    | 0.21491 | 0.09   | 0.0190 |
| 26963-02F                                   | 3.3          | 446c                            | 0.13540                      | 0.00017                  | 195740.5                 | 162.6                    | 43720.7                  | 24.8                                       | 477.0                                      | 23.9                                       | 525.9            | 8.3                                        | 20.8                                       | 1.7                                        | 0.69                                            | 21.0   | 0.0615 | 0.0010 | 4.3356   | ± 0.0122 | 96.9  | 1.074 | 0.003   | 0.00010 | 8.13    | 0.22345 | 0.10   | 0.0093 |
| 26963-02G                                   | 4.5          | 446c                            | 0.13540                      | 0.00017                  | 30706.7                  | 152.1                    | 29111.4                  | 22.3                                       | 357.0                                      | 25.9                                       | 324.8            | 8.2                                        | 12.1                                       | 1.7                                        | 0.46                                            | 14.0   | 0.0571 | 0.0015 | 4.3668   | ± 0.0183 | 97.3  | 1.082 | 0.005   | 0.00009 | 14.8    | 0.22281 | 0.14   | 0.0072 |
| 26963-02H                                   | 6.1          | 446c                            | 0.13540                      | 0.00017                  | 44950.5                  | 145.2                    | 7858.4                   | 11.7                                       | 97.3                                       | 28.1                                       | 93.6             | 8.1                                        | 2.8                                        | 1.6                                        | 0.12                                            | 3.8    | 0.0609 | 0.0053 | 4.3422   | ± 0.0267 | 97.7  | 1.076 | 0.016   | 0.00008 | 57.63   | 0.22293 | 0.43   | 0.0666 |
| <i>MAG14-2A-102Q-1 104-119 - Aliquot #3</i> |              |                                 |                              |                          |                          |                          |                          |                                            |                                            |                                            |                  |                                            |                                            |                                            |                                                 |        |        |        |          |          |       |       |         |         |         |         |        |        |
| 26963-03A                                   | 1.0          | 446c                            | 0.13540                      | 0.00017                  | 51921.3                  | 139.6                    | 5746.9                   | 9.3                                        | 96.3                                       | 21.0                                       | 52.2             | 8.3                                        | 89.4                                       | 1.7                                        | 0.09                                            | 4.5    | 0.0464 | 0.0075 | 4.3920   | ± 0.0922 | 48.6  | 1.088 | 0.023   | 0.00172 | 1.93    | 0.11072 | 0.31   | 0.1206 |
| 26963-03B                                   | 1.4          | 446c                            | 0.13540                      | 0.00017                  | 166175.5                 | 156.6                    | 35351.5                  | 26.0                                       | 454.8                                      | 20.1                                       | 327.2            | 8.5                                        | 47.3                                       | 1.8                                        | 0.56                                            | 27.5   | 0.0474 | 0.0012 | 4.3032   | ± 0.0163 | 91.5  | 1.066 | 0.004   | 0.00028 | 3.85    | 0.21272 | 0.12   | 0.0210 |
| 26963-03C                                   | 1.8          | 446c                            | 0.13540                      | 0.00017                  | 89933.7                  | 157.1                    | 40044.1                  | 24.8                                       | 489.5                                      | 24.9                                       | 372.9            | 8.5                                        | 60.1                                       | 1.7                                        | 0.63                                            | 31.2   | 0.0477 | 0.0011 | 4.2955   | ± 0.0135 | 90.6  | 1.064 | 0.003   | 0.00031 | 2.84    | 0.21091 | 0.10   | 0.0259 |
| 26963-03D                                   | 2.5          | 446c                            | 0.13540                      | 0.00017                  | 181634.7                 | 159.8                    | 38999.0                  | 26.0                                       | 462.8                                      | 16.7                                       | 360.7            | 8.4                                        | 47.3                                       | 1.7                                        | 0.61                                            | 30.3   | 0.0474 | 0.0011 | 4.2954   | ± 0.0142 | 92.3  | 1.064 | 0.004   | 0.00026 | 3.69    | 0.21479 | 0.11   | 0.0209 |
| 26963-03E                                   | 3.3          | 446c                            | 0.13540                      | 0.00017                  | 37613.1                  | 133.3                    | 8375.3                   | 12.0                                       | 111.0                                      | 22.0                                       | 79.6             | 8.3                                        | 4.6                                        | 1.7                                        | 0.13                                            | 6.5    | 0.0488 | 0.0051 | 4.3274   | ± 0.0627 | 96.4  | 1.072 | 0.016   | 0.00012 | 37.28   | 0.22275 | 0.38   | 0.0089 |
| <i>MAG14-2A-102Q-1 104-119 - Aliquot #4</i> |              |                                 |                              |                          |                          |                          |                          |                                            |                                            |                                            |                  |                                            |                                            |                                            |                                                 |        |        |        |          |          |       |       |         |         |         |         |        |        |
| 26963-04A                                   | 1.0          | 446c                            | 0.13540                      | 0.00017                  | 55682.5                  | 130.2                    | 7244.1                   | 11.6                                       | 90.0                                       | 16.2                                       | 44.6             | 8.4                                        | 83.1                                       | 1.8                                        | 0.11                                            | 5.4    | 0.0350 | 0.0067 | 4.2617   | ± 0.0761 | 55.5  | 1.056 | 0.019   | 0.00149 | 2.17    | 0.13015 | 0.28   | 0.0903 |
| 26963-04B                                   | 1.4          | 446c                            | 0.13540                      | 0.00017                  | 164517.7                 | 155.5                    | 34525.6                  | 23.5                                       | 389.3                                      | 22.3                                       | 313.7            | 8.4                                        | 53.4                                       | 1.8                                        | 0.54                                            | 25.9   | 0.0519 | 0.0014 | 4.3032   | ± 0.0163 | 90.3  | 1.066 | 0.004   | 0.00032 | 3.25    | 0.20995 | 0.12   | 0.0248 |
| 26963-04C                                   | 1.8          | 446c                            | 0.13540                      | 0.00017                  | 224239.4                 | 145.6                    | 49902.2                  | 28.5                                       | 585.2                                      | 22.3                                       | 443.9            | 8.5                                        | 33.2                                       | 1.8                                        | 0.78                                            | 37.1   | 0.0512 | 0.0010 | 4.3328   | ± 0.0114 | 95.6  | 1.074 | 0.003   | 0.00015 | 5.42    | 0.22071 | 0.09   | 0.0107 |
| 26963-04D                                   | 2.5          | 446c                            | 0.13540                      | 0.00017                  | 139587.2                 | 142.0                    | 31097.2                  | 23.5                                       | 352.4                                      | 20.5                                       | 261.6            | 8.5                                        | 13.9                                       | 1.6                                        | 0.49                                            | 23.3   | 0.0480 | 0.0016 | 4.3557   | ± 0.0165 | 97.1  | 1.079 | 0.004   | 0.00010 | 11.82   | 0.22287 | 0.13   | 0.0074 |
| 26963-04E                                   | 3.3          | 446c                            | 0.13540                      | 0.00017                  | 49365.3                  | 126.5                    | 11134.0                  | 12.5                                       | 116.7                                      | 24.2                                       | 78.6             | 8.4                                        | 4.4                                        | 1.6                                        | 0.18                                            | 3.8    | 0.0402 | 0.0043 | 4.3143   | ± 0.0445 | 97.3  | 1.069 | 0.011   | 0.00009 | 36.35   | 0.22564 | 0.28   | 0.0065 |
| <i>MAG14-2A-102Q-1 104-119 - Aliquot #5</i> |              |                                 |                              |                          |                          |                          |                          |                                            |                                            |                                            |                  |                                            |                                            |                                            |                                                 |        |        |        |          |          |       |       |         |         |         |         |        |        |
| 26963-05A                                   | 1.0          | 446c                            | 0.13540                      | 0.00017                  | 45999.1                  | 127.5                    | 4093.7                   | 7.8                                        | 62.9                                       | 22.3                                       | 25.6             | 8.3                                        | 95.8                                       | 1.9                                        | 0.06                                            | 2.4    | 0.0356 | 0.0117 | 4.2325   | ± 0.1454 | 37.7  | 1.049 | 0.036   | 0.00209 | 2.05    | 0.08915 | 0.34   | 0.1127 |
| 26963-05B                                   | 1.4          | 446c                            | 0.13540                      | 0.00017                  | 88529.8                  | 134.7                    | 19490.1                  | 17.4                                       | 217.0                                      | 33.9                                       | 205.3            | 8.5                                        | 15.2                                       | 1.6                                        | 0.31                                            | 11.3   | 0.0603 | 0.0025 | 4.3101   | ± 0.0262 | 94.9  | 1.068 | 0.006   | 0.00017 | 10.83   | 0.22025 | 0.18   | 0.0225 |
| 26963-05C                                   | 1.8          | 446c                            | 0.13540                      | 0.00017                  | 293994.7                 | 167.0                    | 61014.0                  | 31.0                                       | 721.4                                      | 23.3                                       | 515.8            | 8.5                                        | 40.5                                       | 1.7                                        | 1.01                                            | 37.3   | 0.0460 | 0.0008 | 4.3978   | ± 0.0086 | 95.9  | 1.090 | 0.002   | 0.00014 | 4.23    | 0.21813 | 0.08   | 0.0127 |
| 26963-05D                                   | 2.5          | 446c                            | 0.13540                      | 0.00017                  | 139009.6                 | 141.8                    | 31596.3                  | 22.3                                       | 374.6                                      | 27.3                                       | 240.2            | 8.3                                        | 7.2                                        | 1.6                                        | 0.50                                            | 18.4   | 0.0430 | 0.0015 | 4.3315   | ± 0.0157 | 98.5  | 1.073 | 0.004   | 0.00005 | 22.28   | 0.22739 | 0.12   | 0.0040 |
| 26963-05E                                   | 3.3          | 446c                            | 0.13540                      | 0.00017                  | 194908.7                 | 168.1                    | 43693.3                  | 28.5                                       | 514.4                                      | 25.3                                       | 332.8            | 8.3                                        | 6.3                                        | 1.5                                        | 0.69                                            | 25.4   | 0.0436 | 0.0011 | 4.3228   | ± 0.0113 | 99.0  | 1.071 | 0.003   | 0.00003 | 24.60   | 0.22913 | 0.11   | 0.0032 |
| 26963-05F                                   | 4.5          | 446c                            | 0.13540                      | 0.00017                  | 40558.5                  | 143.5                    | 30604.9                  | 12.1                                       | 115.5                                      | 23.3                                       | 58.8             | 8.2                                        | 2.5                                        | 1.5                                        | 0.14                                            | 5.3    | 0.0371 | 0.0052 | 4.3917   | ± 0.0524 | 98.2  | 1.088 | 0.013   | 0.00006 | 61.24   | 0.22537 | 0.38   | 0.0054 |
| <i>MAG14-2A-045Y-2 000-021</i>              |              |                                 |                              |                          |                          |                          |                          |                                            |                                            |                                            |                  |                                            |                                            |                                            |                                                 |        |        |        |          |          |       |       |         |         |         |         |        |        |
| 26964-01A                                   | 1.0          | 446c                            | 0.13540                      | 0.00017                  | 483117.1                 | 201.5                    | 15887.9                  | 16.2                                       | 464.4                                      | 37.1                                       | 40.7             | 8.2                                        | 1544.2                                     | 7.1                                        | 0.25                                            | 5.5    | 0.0128 | 0.0027 | 1.3886   | ± 0.1344 | 4.6   | 0.344 | 0.033   | 0.00320 | 0.46    | 0.03290 | 0.11   | 0.0597 |
| 26964-01B                                   | 1.4          | 446c                            | 0.13540                      | 0.00017                  | 259648.3                 | 168.4                    | 66355.0                  | 33.0                                       | 880.4                                      | 40.6                                       | 160.8            | 8.3                                        | 594.3                                      | 3.7                                        | 1.05                                            | 23.0   | 0.0121 | 0.0006 | 1.2387   | ± 0.0711 | 31.7  | 0.307 | 0.004   | 0.00229 | 0.63    | 0.25566 | 0.08   | 0.0951 |
| 26964-01C                                   | 1.8          | 446c                            | 0.13540                      | 0.00017                  | 75128.2                  | 142.3                    | 30012.3                  | 26.0                                       | 431.8                                      | 37.1                                       | 70.7             | 8.2                                        | 83.6                                       | 1.9                                        | 0.61                                            | 13.5   | 0.0089 | 0.0011 | 1.2859   | ± 0.0153 | 66.8  | 0.319 | 0.004   | 0.00011 | 2.32    | 0.51952 | 0.20   | 0.0779 |
| 26964-01D                                   | 2.5          | 446c                            | 0.13540                      | 0.00017                  | 137523.3                 | 151.1                    | 72943.3                  | 32.2                                       | 886.4                                      | 30.3                                       | 170.3            | 8.2                                        | 150.5                                      | 2.3                                        | 1.14                                            | 25.1   | 0.0117 | 0.0006 | 1.2775   | ± 0.0096 | 67.4  | 0.316 | 0.002   | 0.00109 | 1.53    | 0.52729 | 0.11   | 0.0651 |
| 26964-01E                                   | 3.3          | 446c                            | 0.13540                      | 0.00017                  | 109821.1                 | 140.1                    | 50465.7                  | 34.7                                       | 624.7                                      | 21.0                                       | 130.5            | 8.1                                        | 150.0                                      | 2.2                                        | 0.80                                            | 17.5   | 0.0130 | 0.0008 | 1.2887   | ± 0.0134 | 59.2  | 0.319 | 0.003   | 0.00137 | 1.49    | 0.45974 | 0.15   | 0.0785 |
| 26964-01F                                   | 4.5          | 446c                            | 0.13540                      | 0.00017                  | 71196.3                  | 132.8                    | 32523.4                  | 24.8                                       | 364.2                                      | 21.0                                       | 105.7            | 8.1                                        | 98.4                                       | 2.0                                        | 0.51                                            | 11.3   | 0.0104 | 0.0003 | 1.2861   | ± 0.0190 | 58.8  | 0.319 | 0.005   | 0.00138 | 2.06    | 0.45702 | 0.20   | 0.0851 |
| 26964-01G                                   | 6.1          | 446c                            | 0.13540                      | 0.00017                  | 34423.4                  | 133.5                    | 11601.0                  | 13.7                                       | 153.4                                      | 22.9                                       | 47.7             | 8.0                                        | 60.3                                       | 1.9                                        | 0.18                                            | 4.0    | 0.0209 | 0.0036 | 1.4162   | ± 0.0512 | 47.7  |       |         |         |         |         |        |        |





|                                       |     |      |         |         |          |       |         |      |       |      |       |     |        |     |      |      |         |        |         |          |       |        |       |          |         |         |      |        |
|---------------------------------------|-----|------|---------|---------|----------|-------|---------|------|-------|------|-------|-----|--------|-----|------|------|---------|--------|---------|----------|-------|--------|-------|----------|---------|---------|------|--------|
| 27187-04B                             | 1.3 | 4A7A | 0.14080 | 0.00014 | 81661.4  | 119.3 | 22195.5 | 17.4 | 285.5 | 5.9  | 1.6   | 9.5 | 145.0  | 1.8 | 0.34 | 28.2 | 0.0114  | 0.0709 | 1.7267  | ± 0.0250 | 47.0  | 0.445  | 0.006 | 0.00177  | 1.26    | 0.27225 | 0.17 | 0.1053 |
| 27187-04C                             | 1.7 | 4A7A | 0.14080 | 0.00014 | 40207.9  | 117.8 | 19076.4 | 16.2 | 244.6 | 12.5 | -4.7  | 9.5 | 26.8   | 1.5 | 0.29 | 24.2 | -0.0415 | 0.0829 | 1.6835  | ± 0.0252 | 80.0  | 0.434  | 0.006 | 0.00067  | 5.81    | 0.47526 | 0.31 | 0.0488 |
| 27187-04D                             | 2.2 | 4A7A | 0.14080 | 0.00014 | 28670.3  | 118.1 | 12451.5 | 12.5 | 159.7 | 11.2 | 9.1   | 9.5 | 28.1   | 1.5 | 0.19 | 15.8 | 0.1212  | 0.1274 | 1.6344  | ± 0.0380 | 70.9  | 0.421  | 0.010 | 0.00097  | 5.49    | 0.43377 | 0.42 | 0.0731 |
| 27187-04E                             | 2.9 | 4A7A | 0.14080 | 0.00014 | 28111.5  | 117.1 | 11374.4 | 12.5 | 153.6 | 7.6  | 13.9  | 9.5 | 30.9   | 1.5 | 0.17 | 14.5 | 0.2025  | 0.1390 | 1.6666  | ± 0.0416 | 67.5  | 0.429  | 0.011 | 0.00109  | 5.05    | 0.40527 | 0.43 | 0.0800 |
| 27187-04F                             | 3.5 | 4A7A | 0.14080 | 0.00014 | 4092.6   | 115.6 | 1878.6  | 5.5  | 27.5  | 7.9  | -13.6 | 9.5 | 0.3    | 1.5 | 0.03 | 2.4  | -1.2027 | 0.8415 | 2.0724  | ± 0.2439 | 95.2  | 0.533  | 0.063 | 0.0016   | 227.50  | 0.46002 | 2.84 | 0.1024 |
| MAG14-2A-045Y-2 120-136 - Aliquot #5  |     |      |         |         |          |       |         |      |       |      |       |     |        |     |      |      |         |        |         |          |       |        |       |          |         |         |      |        |
| 27187-05A                             | 1.0 | 4A7A | 0.14080 | 0.00014 | 45101.2  | 119.1 | 3390.4  | 7.7  | 57.4  | 6.2  | 2.6   | 9.5 | 139.2  | 1.6 | 0.05 | 7.8  | 0.1294  | 0.4659 | 1.0481  | ± 0.1486 | 7.9   | 0.270  | 0.038 | 0.00309  | 1.21    | 0.07529 | 0.35 | 0.1674 |
| 27187-05B                             | 1.3 | 4A7A | 0.14080 | 0.00014 | 33743.0  | 117.2 | 11062.5 | 12.2 | 148.9 | 9.9  | 6.5   | 9.4 | 63.5   | 1.6 | 0.17 | 25.3 | 0.0971  | 0.1416 | 1.3381  | ± 0.0437 | 43.9  | 0.345  | 0.011 | 0.00188  | 2.50    | 0.32838 | 0.36 | 0.1327 |
| 27187-05C                             | 1.7 | 4A7A | 0.14080 | 0.00014 | 11664.7  | 116.4 | 5519.1  | 8.8  | 81.7  | 8.2  | 28.4  | 9.4 | 15.7   | 1.5 | 0.08 | 12.6 | 0.8553  | 0.2841 | 1.2957  | ± 0.0870 | 61.4  | 0.334  | 0.022 | 0.00129  | 10.40   | 0.47381 | 1.01 | 0.0948 |
| 27187-05D                             | 2.2 | 4A7A | 0.14080 | 0.00014 | 28606.9  | 117.0 | 17199.2 | 14.9 | 198.2 | 12.0 | -1.2  | 9.3 | 18.5   | 1.5 | 0.26 | 39.4 | 0.0120  | 0.0904 | 1.3387  | ± 0.0272 | 80.6  | 0.345  | 0.007 | 0.00065  | 8.19    | 0.60227 | 0.42 | 0.0490 |
| 27187-05E                             | 2.9 | 4A7A | 0.14080 | 0.00014 | 6924.5   | 114.7 | 4436.1  | 8.3  | 40.8  | 9.9  | 16.8  | 9.3 | 2.9    | 1.5 | 0.07 | 10.2 | 0.6288  | 0.3501 | 1.3873  | ± 0.1034 | 89.0  | 0.357  | 0.027 | 0.00337  | 58.46   | 0.61612 | 1.67 | 0.0282 |
| 27187-05F                             | 3.7 | 4A7A | 0.14080 | 0.00014 | 3145.9   | 114.4 | 2080.3  | 6.0  | 26.5  | 6.5  | -9.6  | 9.4 | 0.3    | 1.5 | 0.03 | 4.8  | -0.7695 | 0.7485 | 1.4288  | ± 0.2214 | 94.7  | 0.368  | 0.057 | 0.00018  | 266.93  | 0.66264 | 3.65 | 0.0136 |
| MAG14-2A-045Y-2 120-136 - Aliquot #6  |     |      |         |         |          |       |         |      |       |      |       |     |        |     |      |      |         |        |         |          |       |        |       |          |         |         |      |        |
| 27187-06A                             | 1.0 | 4A7A | 0.14080 | 0.00014 | 26613.8  | 116.4 | 7966.9  | 10.6 | 109.9 | 8.5  | 7.4   | 9.3 | 56.1   | 1.5 | 0.12 | 17.4 | 0.1552  | 0.1952 | 1.2426  | ± 0.0600 | 37.3  | 0.320  | 0.015 | 0.00210  | 2.81    | 0.29983 | 0.46 | 0.1491 |
| 27187-06B                             | 1.3 | 4A7A | 0.14080 | 0.00014 | 20448.4  | 114.9 | 8566.0  | 11.7 | 87.7  | 8.0  | 18.5  | 9.4 | 31.5   | 1.4 | 0.13 | 18.8 | 0.3593  | 0.1821 | 1.3004  | ± 0.0527 | 54.6  | 0.335  | 0.014 | 0.00125  | 4.73    | 0.41957 | 0.58 | 0.1155 |
| 27187-06C                             | 1.7 | 4A7A | 0.14080 | 0.00014 | 20830.7  | 115.5 | 10100.9 | 12.3 | 121.0 | 10.1 | 3.2   | 9.5 | 23.6   | 1.5 | 0.16 | 22.1 | 0.0527  | 0.1577 | 1.3655  | ± 0.0467 | 66.3  | 0.352  | 0.012 | 0.00113  | 6.55    | 0.48573 | 0.57 | 0.0829 |
| 27187-06D                             | 2.2 | 4A7A | 0.14080 | 0.00014 | 21529.5  | 116.9 | 10321.1 | 12.1 | 110.8 | 12.5 | 8.9   | 9.6 | 27.7   | 1.6 | 0.16 | 22.6 | 0.1436  | 0.1546 | 1.2877  | ± 0.0473 | 61.8  | 0.332  | 0.012 | 0.00128  | 5.80    | 0.48019 | 0.56 | 0.0916 |
| 27187-06E                             | 2.9 | 4A7A | 0.14080 | 0.00014 | 11538.6  | 115.6 | 6597.7  | 9.8  | 59.3  | 9.2  | -2.9  | 9.6 | 7.4    | 1.5 | 0.10 | 14.4 | -0.0729 | 0.2418 | 1.4103  | ± 0.0720 | 80.8  | 0.363  | 0.019 | 0.00064  | 20.83   | 0.6280  | 1.01 | 0.0476 |
| 27187-06F                             | 3.7 | 4A7A | 0.14080 | 0.00014 | 3060.3   | 115.0 | 2126.7  | 5.9  | 14.3  | 12.0 | -3.4  | 9.6 | -3.0   | 1.5 | 0.03 | 4.7  | -0.2671 | 0.7499 | 1.8407  | ± 0.2177 | 128.2 | 0.474  | 0.056 | -0.00094 | -52.26  | 0.69622 | 3.77 | 0.0718 |
| MAG14-2A-045Y-2 120-136 - Aliquot #7  |     |      |         |         |          |       |         |      |       |      |       |     |        |     |      |      |         |        |         |          |       |        |       |          |         |         |      |        |
| 27187-07A                             | 1.0 | 4A7A | 0.14080 | 0.00014 | 3965.6   | 115.3 | 2108.9  | 6.3  | 15.4  | 10.0 | -16.0 | 9.6 | 2.5    | 1.5 | 0.03 | 7.9  | -1.2683 | 0.7570 | 1.4733  | ± 0.2211 | 78.5  | 0.380  | 0.057 | 0.00072  | 53.23   | 0.53295 | 2.92 | 0.0544 |
| 27187-07B                             | 1.3 | 4A7A | 0.14080 | 0.00014 | 13214.9  | 115.2 | 6841.6  | 10.1 | 81.7  | 8.5  | -7.3  | 9.5 | 13.8   | 1.5 | 0.11 | 25.6 | -0.1782 | 0.2322 | 1.3180  | ± 0.0674 | 68.4  | 0.340  | 0.017 | 0.00106  | 10.73   | 0.51864 | 0.88 | 0.0802 |
| 27187-07C                             | 1.7 | 4A7A | 0.14080 | 0.00014 | 13356.8  | 114.9 | 4654.7  | 8.2  | 64.3  | 6.6  | 6.0   | 9.5 | 26.6   | 1.6 | 0.07 | 17.4 | 0.2158  | 0.3411 | 1.1485  | ± 0.1046 | 68.8  | 0.301  | 0.027 | 0.00198  | 6.05    | 0.54905 | 0.88 | 0.1394 |
| 27187-07D                             | 2.2 | 4A7A | 0.14080 | 0.00014 | 2100.1   | 114.0 | 1375.5  | 4.7  | 9.8   | 8.4  | 0.8   | 9.4 | -0.4   | 1.5 | 0.02 | 5.1  | 0.1006  | 1.1483 | 1.6132  | ± 0.3364 | 105.8 | 0.416  | 0.087 | -0.00020 | -365.76 | 0.65612 | 3.44 | 0.0148 |
| 27187-07E                             | 2.9 | 4A7A | 0.14080 | 0.00014 | 8657.4   | 113.7 | 5221.0  | 10.0 | 73.1  | 7.7  | 19.7  | 9.5 | 9.6    | 1.5 | 0.08 | 19.5 | 0.6319  | 0.3036 | 1.1340  | ± 0.0875 | 68.5  | 0.292  | 0.023 | 0.00106  | 16.30   | 0.60399 | 1.32 | 0.0799 |
| 27187-07F                             | 3.7 | 4A7A | 0.14080 | 0.00014 | 5251.9   | 112.4 | 2994.4  | 7.0  | 42.8  | 9.7  | -9.4  | 9.5 | 3.9    | 1.4 | 0.05 | 11.2 | -0.5271 | 0.5288 | 1.3397  | ± 0.1492 | 76.5  | 0.345  | 0.038 | 0.00079  | 35.20   | 0.57125 | 2.15 | 0.0690 |
| 27187-07G                             | 4.8 | 4A7A | 0.14080 | 0.00014 | 4118.6   | 111.8 | 2432.6  | 6.0  | 33.6  | 6.2  | -6.0  | 9.4 | 1.9    | 1.4 | 0.04 | 9.1  | -0.4102 | 0.6492 | 1.4356  | ± 0.1824 | 85.0  | 0.370  | 0.047 | 0.00050  | 69.45   | 0.57177 | 2.73 | 0.0389 |
| 27187-07H                             | 6.3 | 4A7A | 0.14080 | 0.00014 | 2606.2   | 111.5 | 1132.5  | 4.8  | 12.4  | 7.8  | -2.5  | 9.5 | 1.2    | 1.5 | 0.02 | 4.2  | -0.3626 | 1.4029 | 1.9114  | ± 0.4033 | 39.7  | 0.235  | 0.104 | 0.00202  | 28.54   | 0.45334 | 4.00 | 0.0944 |
| MAG14-2A-045Y-2 120-136 - Aliquot #8  |     |      |         |         |          |       |         |      |       |      |       |     |        |     |      |      |         |        |         |          |       |        |       |          |         |         |      |        |
| 27187-08A                             | 1.0 | 4A7A | 0.14080 | 0.00014 | 48255.7  | 114.1 | 3295.0  | 7.2  | 78.0  | 9.5  | 0.5   | 9.5 | 149.7  | 1.8 | 0.05 | 8.2  | 0.0243  | 0.4822 | 1.0779  | ± 0.1674 | 7.4   | 0.278  | 0.043 | 0.00310  | 1.23    | 0.06839 | 0.32 | 0.1430 |
| 27187-08B                             | 1.3 | 4A7A | 0.14080 | 0.00014 | 71866.1  | 114.9 | 14361.9 | 13.7 | 207.2 | 8.9  | 15.3  | 9.5 | 157.0  | 1.7 | 0.22 | 35.5 | 0.1776  | 0.1109 | 1.7454  | ± 0.0367 | 34.9  | 0.450  | 0.009 | 0.00218  | 1.11    | 0.20016 | 0.19 | 0.1267 |
| 27187-08C                             | 1.7 | 4A7A | 0.14080 | 0.00014 | 64410.9  | 115.4 | 9810.5  | 11.0 | 156.0 | 7.4  | -9.6  | 9.5 | 157.3  | 1.8 | 0.15 | 24.3 | -0.1639 | 0.1625 | 1.7702  | ± 0.0565 | 27.0  | 0.456  | 0.015 | 0.00244  | 1.17    | 0.15257 | 0.21 | 0.1328 |
| 27187-08D                             | 2.2 | 4A7A | 0.14080 | 0.00014 | 23488.2  | 112.2 | 7331.2  | 9.9  | 105.6 | 8.7  | -4.0  | 9.5 | 35.1   | 1.6 | 0.11 | 18.1 | -0.0929 | 0.2175 | 1.7695  | ± 0.0680 | 55.3  | 0.456  | 0.018 | 0.00150  | 4.66    | 0.31265 | 0.50 | 0.0989 |
| 27187-08E                             | 2.9 | 4A7A | 0.14080 | 0.00014 | 15496.7  | 113.0 | 4739.4  | 8.7  | 61.0  | 5.6  | -21.0 | 9.6 | 19.9   | 1.5 | 0.07 | 11.7 | -0.7500 | 0.3420 | 1.9908  | ± 0.0988 | 60.7  | 0.510  | 0.025 | 0.00152  | 7.51    | 0.30643 | 0.75 | 0.0948 |
| 27187-08F                             | 3.8 | 4A7A | 0.14080 | 0.00014 | 2316.6   | 113.3 | 871.4   | 3.9  | 3.7   | 6.6  | -2.6  | 9.6 | 1.1    | 1.5 | 0.01 | 2.2  | -0.5056 | 1.8574 | 2.2410  | ± 0.5194 | 84.5  | 0.577  | 0.134 | 0.00052  | 121.94  | 0.37686 | 4.91 | 0.0399 |
| MAG14-2A-045Y-2 120-136 - Aliquot #9  |     |      |         |         |          |       |         |      |       |      |       |     |        |     |      |      |         |        |         |          |       |        |       |          |         |         |      |        |
| 27187-09A                             | 1.0 | 4A7A | 0.14080 | 0.00014 | 53519.4  | 118.3 | 4029.1  | 7.8  | 82.5  | 8.5  | -8.4  | 9.6 | 166.9  | 1.8 | 0.06 | 11.3 | -0.3523 | 0.4021 | 0.9008  | ± 0.1368 | 6.8   | 0.232  | 0.035 | 0.00312  | 1.10    | 0.07541 | 0.29 | 0.1530 |
| 27187-09B                             | 1.3 | 4A7A | 0.14080 | 0.00014 | 99309.3  | 121.7 | 12286.8 | 12.5 | 201.8 | 11.4 | -19.8 | 9.6 | 284.2  | 2.0 | 0.19 | 34.5 | -0.2726 | 0.1320 | 1.1643  | ± 0.0503 | 14.4  | 0.300  | 0.013 | 0.00287  | 0.73    | 0.12394 | 0.16 | 0.1374 |
| 27187-09C                             | 1.7 | 4A7A | 0.14080 | 0.00014 | 32291.2  | 118.3 | 10462.7 | 11.6 | 133.8 | 6.8  | -25.4 | 9.6 | 59.1   | 1.6 | 0.16 | 29.4 | -0.4106 | 0.1546 | 1.3805  | ± 0.0469 | 44.8  | 0.356  | 0.012 | 0.00185  | 2.70    | 0.32460 | 0.38 | 0.1304 |
| 27187-09D                             | 2.2 | 4A7A | 0.14080 | 0.00014 | 2155.490 | 116.5 | 3385.3  | 7.1  | 53.1  | 7.5  | 5.9   | 9.6 | 32.2   | 1.5 | 0.05 | 10.5 | 0.2926  | 0.4199 | 1.6301  | ± 0.0529 | 12.3  | 0.319  | 0.014 | 0.00237  | 94.3    | 0.03059 | 1.99 | 0.0205 |
| 27187-09E                             | 2.9 | 4A7A | 0.14080 | 0.00014 | 7234.8   | 116.7 | 4005.5  | 8.3  | 49.2  | 7.7  | -17.7 | 9.6 | 2.3    | 1.5 | 0.06 | 11.3 | -0.7465 | 0.4040 | 1.3805  | ± 0.1133 | 89.0  | 0.413  | 0.029 | 0.00337  | 54.95   | 0.55543 | 1.63 | 0.0291 |
| 27187-09F                             | 3.7 | 4A7A | 0.14080 | 0.00014 | 3195.5   | 117.3 | 1424.0  | 4.8  | 7.1   | 9.9  | -8.6  | 9.5 | 1.7    | 1.5 | 0.02 | 4.0  | -1.0237 | 1.1327 | 1.8511  | ± 0.3219 | 82.7  | 0.477  | 0.083 | 0.00058  | 80.19   | 0.44654 | 3.69 | 0.0456 |
| MAG14-2A-045Y-2 120-136 - Aliquot #10 |     |      |         |         |          |       |         |      |       |      |       |     |        |     |      |      |         |        |         |          |       |        |       |          |         |         |      |        |
| 27187-10A                             | 1.0 | 4A7A | 0.14080 | 0.00014 | 535119.4 | 156.0 | 4297.2  | 8.7  | 395.5 | 15.5 | -8.9  | 9.6 | 1813.9 | 4.4 | 0.07 | 19.3 | -0.3532 | 0.3765 | -1.5087 | ± 0.3129 | -1.2  | -0.389 | 0.081 | 0.00339  | 0.25    | 0.00804 | 0.20 | 0.0468 |
| 27187-10B                             | 1.3 | 4A7A | 0.14080 | 0.00014 | 62154.3  | 120.9 | 8388.4  | 12.2 | 118.6 | 8.1  | 11.2  | 9.5 | 176.1  | 1.8 | 0.13 | 37.8 | 0.2263  | 0.1298 | 1.1471  | ± 0.0662 | 15.5  | 0.295  | 0.017 | 0.00283  | 1.05    | 0.15317 | 0.24 | 0.1511 |
| 27187-10C                             | 1.7 | 4A7A | 0.14080 | 0.00014 | 45916.6  | 120.6 | 5280.8  | 8.4  | 78.5  | 7.2  | -5.9  | 9.6 | 130.5  | 1.8 | 0.08 | 23.8 | -0.1903 | 0.3074 | 1.3841  | ± 0.1045 | 15.0  | 0.336  | 0.027 | 0.00285  | 1.41    | 0.11520 | 0.21 | 0.1612 |
| 27187-10D                             | 2.2 | 4A7A | 0.14080 | 0.00014 | 30613.3  | 119.5 | 3129.4  | 6.5  | 57.1  | 6.2  | -25.1 | 9.6 | 85.1   | 1.6 | 0.05 | 14.1 |         |        |         |          |       |        |       |          |         |         |      |        |

|                                       |     |      |        |        |          |      |         |      |        |       |       |      |        |      |      |         |         |         |          |          |        |        |           |           |         |         |        |        |  |  |  |
|---------------------------------------|-----|------|--------|--------|----------|------|---------|------|--------|-------|-------|------|--------|------|------|---------|---------|---------|----------|----------|--------|--------|-----------|-----------|---------|---------|--------|--------|--|--|--|
| 27190-01B                             | 1.3 | 4A7A | 1.4130 | 000014 | 75931.1  | 3279 | 15998.8 | 18.2 | -125.2 | 98.1  | -90.3 | 17.4 | -149.2 | 14.4 | 0.24 | 15.6    | -0.9864 | 0.1896  | 7.4727   | ± 0.2685 | 157.8  | 1.932  | 0.069     | - 0.00193 | - 9.79  | 0.21113 | 0.45   | 0.0428 |  |  |  |
| 27190-01C                             | 2.2 | 4A7A | 1.4130 | 000014 | 120744.0 | 1178 | 26430.2 | 19.9 | 325.2  | 11.8  | 3.6   | 10.8 | 34.4   | 2.4  | 0.40 | 25.7    | 0.0247  | 0.0748  | 4.1738   | ± 0.0275 | 91.5   | 1.079  | 0.007     | 0.00028   | 6.96    | 0.21026 | 0.12   | 0.0120 |  |  |  |
| 27190-01D                             | 2.9 | 4A7A | 1.4130 | 000014 | 84367.3  | 1218 | 43469.0 | 24.8 | 528.8  | 11.0  | 19.9  | 10.7 | 18.9   | 2.3  | 0.65 | 42.3    | 0.0832  | 0.0450  | 4.1679   | ± 0.0165 | 97.1   | 1.078  | 0.004     | 0.0010    | 12.76   | 0.23288 | 0.09   | 0.0046 |  |  |  |
| 27190-01E                             | 3.7 | 4A7A | 1.4130 | 000014 | 46664.4  | 1113 | 10677.7 | 12.5 | 125.4  | 9.3   | -6.1  | 10.6 | 3.7    | 2.3  | 0.16 | 10.4    | -0.1046 | 0.1817  | 4.2550   | ± 0.0654 | 97.5   | 1.100  | 0.017     | 0.00008   | 59.64   | 0.22921 | 0.27   | 0.0036 |  |  |  |
| 27190-01F                             | 4.8 | 4A7A | 1.4130 | 000014 | 10838.7  | 1089 | 20313.9 | 6.7  | 24.3   | 13.0  | 28.6  | 10.6 | 1.5    | 2.4  | 0.10 | 2.4     | 2.0818  | 0.7098  | 4.2126   | ± 0.2845 | 97.8   | 1.089  | 0.074     | 0.00007   | 296.32  | 0.23216 | 1.04   | 0.0033 |  |  |  |
| MAG14-2A-102Q-1 104-119 - Aliquot #7  |     |      |        |        |          |      |         |      |        |       |       |      |        |      |      |         |         |         |          |          |        |        |           |           |         |         |        |        |  |  |  |
| 27190-02A                             | 1.0 | 4A7A | 1.4130 | 000014 | 36845.7  | 1845 | 2294.3  | 9.2  | 390.4  | 15.3  | 77.7  | 17.1 | 367.8  | 10.6 | 0.03 | 2.6     | 5.9177  | 1.3037  | -31.5586 | ± 1.3893 | -196.4 | -8.181 | 0.361     | 0.00993   | 2.94    | 0.06224 | 0.64   | 0.1329 |  |  |  |
| 27190-02B                             | 1.3 | 4A7A | 1.4130 | 000014 | 79967.0  | 1689 | 10248.6 | 14.6 | 250.7  | 17.4  | 23.6  | 17.0 | 113.4  | 10.2 | 11.5 | 0.3994  | 0.2905  | 4.5113  | ± 0.2988 | 57.9     | 1.167  | 0.077  | 0.00141   | 9.10      | 0.12835 | 0.26    | 0.0195 |        |  |  |  |
| 27190-02C                             | 1.7 | 4A7A | 1.4130 | 000014 | 84367.3  | 1652 | 18884.0 | 15.7 | 163.9  | 13.4  | 65.6  | 16.8 | 123.1  | 9.8  | 0.28 | 21.1    | 0.6071  | 0.1553  | 2.5417   | ± 0.1556 | 57.0   | 1.167  | 0.077     | 0.00141   | 9.10    | 0.12835 | 0.26   | 0.0195 |  |  |  |
| 27190-02D                             | 2.2 | 4A7A | 1.4130 | 000014 | 108707.2 | 1633 | 23551.0 | 20.4 | 214.9  | 20.6  | 7.1   | 16.6 | 7.7    | 9.2  | 0.35 | 26.3    | 0.0521  | 0.1231  | 4.3847   | ± 0.1172 | 97.8   | 1.134  | 0.030     | 0.00007   | 121.29  | 0.22316 | 0.18   | 0.0011 |  |  |  |
| 27190-02E                             | 2.9 | 4A7A | 1.4130 | 000014 | 108477.0 | 1607 | 43363.3 | 20.4 | 208.5  | 16.3  | 2.8   | 16.4 | -7.4   | 8.8  | 0.36 | 27.3    | 0.0200  | 0.1178  | 4.5363   | ± 0.1086 | 102.1  | 1.173  | 0.028     | - 0.00007 | -118.79 | 0.22497 | 0.17   | 0.0011 |  |  |  |
| 27190-02F                             | 3.7 | 4A7A | 1.4130 | 000014 | 32447.5  | 1718 | 2678.6  | 12.3 | -27.0  | 15.3  | -35.1 | 16.2 | -49.7  | 8.4  | 0.12 | 8.6     | -0.8015 | 0.3693  | 6.1112   | ± 0.3286 | 144.9  | 1.580  | 0.085     | - 0.00150 | -17.31  | 0.23711 | 0.55   | 0.0293 |  |  |  |
| 27190-02G                             | 4.8 | 4A7A | 1.4130 | 000014 | 9891.4   | 1471 | 7075.0  | 7.6  | 24.3   | 13.0  | 43.4  | 15.9 | -1.6   | 7.6  | 0.04 | 2.7     | 3.2084  | 1.1707  | 4.4983   | ± 0.9626 | 108.1  | 1.163  | 0.249     | - 0.00027 | -286.13 | 0.24023 | 1.52   | 0.0051 |  |  |  |
| MAG14-2A-102Q-1 104-119 - Aliquot #8  |     |      |        |        |          |      |         |      |        |       |       |      |        |      |      |         |         |         |          |          |        |        |           |           |         |         |        |        |  |  |  |
| 27190-03A                             | 1.0 | 4A7A | 1.4130 | 000014 | 11403.8  | 2448 | 7.7     | 25.3 | 11.7   | -21.8 | 15.6  | -9.9 | 7.1    | 0.04 | 4.3  | -1.6287 | 1.1671  | 10.1692 | ± 0.9114 | 113.2    | 2.629  | 0.235  | - 0.00044 | -76.55    | 0.11133 | 0.76    | 0.0080 |        |  |  |  |
| 27190-03B                             | 1.3 | 4A7A | 1.4130 | 000014 | 47588.2  | 1424 | 10665.3 | 12.6 | 109.2  | 12.1  | 12.2  | 15.4 | -5.9   | 6.7  | 0.16 | 19.4    | 0.2000  | 0.2534  | 4.6271   | ± 0.1870 | 103.9  | 1.196  | 0.048     | - 0.00013 | -108.23 | 0.22447 | 0.32   | 0.0026 |  |  |  |
| 27190-03C                             | 2.2 | 4A7A | 1.4130 | 000014 | 67549.2  | 1119 | 15414.5 | 15.0 | 181.8  | 8.2   | 18.1  | 10.4 | 12.2   | 2.3  | 0.23 | 28.0    | 0.2147  | 0.1236  | 4.1477   | ± 0.0456 | 94.8   | 1.073  | 0.012     | 0.00017   | 19.69   | 0.22856 | 0.19   | 0.0074 |  |  |  |
| 27190-03D                             | 2.9 | 4A7A | 1.4130 | 000014 | 36345.0  | 1088 | 8019.8  | 11.0 | 99.1   | 9.3   | 2.9   | 10.4 | 9.9    | 2.3  | 0.12 | 14.6    | 0.0662  | 0.2366  | 4.1589   | ± 0.0891 | 91.9   | 1.075  | 0.023     | 0.00027   | 24.02   | 0.22102 | 0.33   | 0.0114 |  |  |  |
| 27190-03E                             | 3.7 | 4A7A | 1.4130 | 000014 | 29783.3  | 1074 | 5733.4  | 9.2  | 65.0   | 10.8  | 19.4  | 10.3 | 6.6    | 2.3  | 0.09 | 0.4     | 0.1699  | 0.3298  | 4.2082   | ± 0.1220 | 93.0   | 1.088  | 0.032     | 0.00023   | 38.07   | 0.22102 | 0.44   | 0.0101 |  |  |  |
| 27190-03F                             | 4.8 | 4A7A | 1.4130 | 000014 | 30108.4  | 1076 | 6886.1  | 9.8  | 80.5   | 11.6  | 19.8  | 10.3 | 4.5    | 2.3  | 0.10 | 12.5    | 0.2568  | 0.2741  | 4.1928   | ± 0.1035 | 96.0   | 1.084  | 0.027     | 0.00013   | 59.05   | 0.22005 | 0.38   | 0.0056 |  |  |  |
| 27190-03G                             | 6.3 | 4A7A | 1.4130 | 000014 | 18361.7  | 1065 | 4325.0  | 8.1  | 48.6   | 7.0   | 16.0  | 10.2 | 2.8    | 2.4  | 0.07 | 7.9     | 0.6794  | 0.4337  | 4.0758   | ± 0.1651 | 96.1   | 1.054  | 0.043     | 0.00013   | 99.62   | 0.23588 | 0.61   | 0.0055 |  |  |  |
| 27190-03H                             | 8.2 | 4A7A | 1.4130 | 000014 | 7170.5   | 1063 | 1682.8  | 5.5  | 8.4    | 8.4   | -1.9  | 10.2 | 1.8    | 2.4  | 0.03 | 3.1     | -0.2106 | 1.0991  | 3.9213   | ± 0.4243 | 92.2   | 1.014  | 0.110     | 0.00026   | 126.22  | 0.23510 | 1.52   | 0.0115 |  |  |  |
| MAG14-2A-102Q-1 104-119 - Aliquot #9  |     |      |        |        |          |      |         |      |        |       |       |      |        |      |      |         |         |         |          |          |        |        |           |           |         |         |        |        |  |  |  |
| 27190-04A                             | 1.0 | 4A7A | 1.4130 | 000014 | 47098.8  | 1379 | 6029.5  | 10.6 | 41.6   | 12.4  | -7.0  | 15.3 | 28.0   | 6.2  | 0.09 | 5.7     | -1.3669 | 0.4445  | 6.3552   | ± 0.3078 | 81.5   | 1.643  | 0.080     | 0.00062   | 21.31   | 0.12829 | 0.34   | 0.0119 |  |  |  |
| 27190-04B                             | 1.3 | 4A7A | 1.4130 | 000014 | 614278.1 | 1403 | 28715.9 | 20.2 | 368.7  | 16.2  | 13.4  | 14.9 | 100.0  | 5.6  | 43.3 | 26.9    | 0.0811  | 0.0912  | 4.5723   | ± 0.0590 | 81.5   | 1.182  | 0.015     | 0.00062   | 5.67    | 0.17834 | 0.11   | 0.0132 |  |  |  |
| 27190-04C                             | 2.2 | 4A7A | 1.4130 | 000014 | 153815.0 | 1176 | 27620.0 | 19.9 | 338.9  | 9.8   | 31.1  | 10.2 | 140.6  | 3.2  | 0.41 | 26.0    | 0.0684  | 0.0684  | 4.1043   | ± 0.0356 | 72.9   | 1.061  | 0.009     | 0.00091   | 2.30    | 0.17552 | 0.11   | 0.0277 |  |  |  |
| 27190-04D                             | 2.9 | 4A7A | 1.4130 | 000014 | 156197.2 | 1197 | 29700.0 | 24.8 | 410.9  | 12.4  | 13.1  | 10.2 | 107.4  | 3.1  | 0.45 | 28.1    | 0.0766  | 0.0622  | 4.1380   | ± 0.0310 | 79.5   | 1.070  | 0.008     | 0.00069   | 2.86    | 0.19219 | 0.11   | 0.0211 |  |  |  |
| 27190-04E                             | 3.7 | 4A7A | 1.4130 | 000014 | 51314.2  | 1097 | 11745.7 | 13.7 | 136.7  | 11.6  | 29.5  | 10.1 | 13.5   | 2.3  | 0.18 | 11.0    | 0.4695  | 0.1582  | 4.0385   | ± 0.0609 | 92.6   | 1.044  | 0.016     | 0.00025   | 18.53   | 0.22925 | 0.24   | 0.0103 |  |  |  |
| 27190-04F                             | 4.8 | 4A7A | 1.4130 | 000014 | 13087.0  | 1079 | 2961.2  | 6.8  | 36.1   | 5.9   | -9.2  | 10.8 | -1.0   | 2.0  | 0.04 | 2.8     | -0.5816 | 0.6815  | 4.4894   | ± 0.2068 | 101.8  | 1.161  | 0.053     | - 0.00006 | -259.19 | 0.22670 | 0.86   | 0.0031 |  |  |  |
| MAG14-2A-102Q-1 104-119 - Aliquot #10 |     |      |        |        |          |      |         |      |        |       |       |      |        |      |      |         |         |         |          |          |        |        |           |           |         |         |        |        |  |  |  |
| 27190-05A                             | 1.0 | 4A7A | 1.4130 | 000014 | 32758.7  | 1318 | 3614.0  | 8.6  | 79.6   | 13.6  | 6.0   | 14.8 | 46.4   | 5.5  | 0.05 | 5.3     | 0.2920  | 0.7191  | 5.1755   | ± 0.4546 | 57.6   | 1.338  | 0.118     | 0.00142   | 11.88   | 0.11124 | 0.47   | 0.0295 |  |  |  |
| 27190-05B                             | 1.3 | 4A7A | 1.4130 | 000014 | 67549.2  | 1325 | 15026.3 | 15.3 | 195.2  | 10.1  | 27.1  | 14.7 | 16.7   | 5.4  | 0.23 | 22.0    | 0.3163  | 0.1719  | 4.1824   | ± 0.1069 | 92.9   | 1.082  | 0.028     | 0.00024   | 33.51   | 0.22221 | 0.22   | 0.0053 |  |  |  |
| 27190-05C                             | 2.2 | 4A7A | 1.4130 | 000014 | 108289.7 | 1148 | 23182.3 | 18.6 | 209.7  | 6.5   | -12.1 | 10.6 | 26.4   | 2.0  | 0.35 | 34.0    | -0.0983 | 0.0861  | 4.1905   | ± 0.0271 | 92.4   | 1.084  | 0.007     | 0.00025   | 7.68    | 0.22056 | 0.14   | 0.0122 |  |  |  |
| 27190-05D                             | 2.9 | 4A7A | 1.4130 | 000014 | 81857.1  | 1106 | 18903.8 | 16.2 | 216.0  | 8.0   | -29.8 | 10.5 | 5.1    | 2.0  | 0.28 | 27.7    | -0.2964 | 0.1041  | 4.2300   | ± 0.0325 | 97.9   | 1.094  | 0.008     | 0.00007   | 34.38   | 0.21315 | 0.16   | 0.0054 |  |  |  |
| 27190-05E                             | 3.7 | 4A7A | 1.4130 | 000014 | 23380.8  | 1072 | 5383.0  | 9.1  | 61.4   | 7.5   | 19.3  | 10.4 | 4.1    | 1.9  | 0.08 | 7.9     | 0.6716  | 0.2809  | 4.1382   | ± 0.102  | 95.4   | 1.070  | 0.028     | 0.00028   | 54.31   | 0.22057 | 0.49   | 0.0079 |  |  |  |
| 27190-05F                             | 4.8 | 4A7A | 1.4130 | 000014 | 9044.9   | 1051 | 2131.4  | 5.5  | 10.2   | 8.3   | -3.2  | 10.2 | 0.1    | 1.9  | 0.03 | 3.1     | -0.2824 | 0.8944  | 4.2042   | ± 0.2755 | 99.2   | 1.087  | 0.071     | 0.00003   | 850.85  | 0.23607 | 1.19   | 0.0013 |  |  |  |
| MAG14-2A-102Q-1 104-119 - Aliquot #11 |     |      |        |        |          |      |         |      |        |       |       |      |        |      |      |         |         |         |          |          |        |        |           |           |         |         |        |        |  |  |  |
| 27190-06A                             | 1.0 | 4A7A | 1.4130 | 000014 | 44914.5  | 1300 | 5266.9  | 9.7  | 84.2   | 12.8  | -38.6 | 14.6 | 48.6   | 5.2  | 0.08 | 8.1     | -1.2879 | 0.4871  | 5.7091   | ± 0.2983 | 67.1   | 1.476  | 0.077     | 0.00110   | 10.61   | 0.11751 | 0.34   | 0.0232 |  |  |  |
| 27190-06B                             | 1.3 | 4A7A | 1.4130 | 000014 | 132698.7 | 1340 | 28023.4 | 18.9 | 357.1  | 11.5  | -19.0 | 14.4 | 29.2   | 5.0  | 0.42 | 43.1    | -0.1198 | 0.0905  | 4.9122   | ± 0.0538 | 93.3   | 1.141  | 0.014     | 0.00022   | 16.97   | 0.21154 | 0.12   | 0.0053 |  |  |  |
| 27190-06C                             | 2.2 | 4A7A | 1.4130 | 000014 | 58878.8  | 1084 | 13365.9 | 13.7 | 139.4  | 7.6   | -3.2  | 10.1 | 10.1   | 1.9  | 0.20 | 26.6    | -0.0448 | 0.1417  | 4.1786   | ± 0.0444 | 94.9   | 1.079  | 0.011     | 0.00017   | 19.21   | 0.22743 | 0.21   | 0.0085 |  |  |  |
| 27190-06D                             | 2.9 | 4A7A | 1.4130 | 000014 | 29177.8  | 1051 | 9983.2  | 9.8  | 69.1   | 9.3   | 38.2  | 10.1 | 5.3    | 1.9  | 0.10 | 10.7    | 0.0278  | 0.2706  | 4.3777   | ± 0.0853 | 95.5   | 1.029  | 0.022     | 0.00015   | 44.93   | 0.24014 | 0.29   | 0.0075 |  |  |  |
| 27190-06E                             | 3.7 | 4A7A | 1.4130 | 000014 | 30952.1  | 1051 | 3798.0  | 10.4 | 84.3   | 7.4   | -9.6  | 10.0 | -1.7   | 1.9  | 0.11 | 11.4    | -0.2448 | 0.2530  | 4.2281   | ± 0.0785 | 101.4  | 1.093  | 0.020     | - 0.00005 | 134.31  | 0.23976 | 0.37   | 0.0023 |  |  |  |
| 27190-06F                             | 4.8 | 4A7A | 1.4130 | 000014 | 16398.6  | 1036 | 3965.0  | 7.4  | 37.2   | 7.1   | 20.8  | 10.0 | 1.2    | 2.0  | 0.06 | 6.1     | 0.9876  | 0.4724  | 4.0767   | ± 0.1507 | 98.7   | 1.054  | 0.039     | 0.00040   | 278.56  | 0.24214 | 0.66   | 0.0022 |  |  |  |
| MAG14-2A-102Q-1 104-119 - Aliquot #12 |     |      |        |        |          |      |         |      |        |       |       |      |        |      |      |         |         |         |          |          |        |        |           |           |         |         |        |        |  |  |  |
| 27190-07A                             | 1.0 | 4A7A | 1.4130 | 000014 | 55870.2  | 1296 | 4960.8  | 9.9  | 66.0   | 10.6  | 3.6   | 14.3 | 90.2   | 5.0  | 0.07 | 6.2     | 0.1286  | 0.5975  | 5.8283   | ± 0.3015 | 51.8   | 1.507  | 0.078     | 0.00161   | 5.54    | 0.08893 | 0.31   | 0.0321 |  |  |  |
| 27190-07B                             | 1.3 | 4A7A | 1.4130 | 000014 | 106380.7 | 1329 | 20070.1 | 17.7 | 242.2  | 12.6  | -27.6 | 14.3 | 47.8   | 4.9  | 0.30 | 25.1    | -0.2420 | 0.1251  | 4.5712   | ± 0.0729 | 86.4   | 1.182  | 0.019     | 0.00046   | 10.07   | 0.18899 | 0.15   | 0.0106 |  |  |  |
| 27190-07C                             | 1.7 | 4A7A | 1.4130 | 000014 | 147174.4 | 1329 | 23685.5 | 21.3 | 339.3  | 13.3  | 17.8  | 14.2 | 64.2   | 4.8  | 0.43 |         |         |         |          |          |        |        |           |           |         |         |        |        |  |  |  |

|                                              |     |      |         |         |          |       |         |      |       |      |       |      |       |     |      |       |         |          |           |             |        |          |         |          |          |          |         |        |  |
|----------------------------------------------|-----|------|---------|---------|----------|-------|---------|------|-------|------|-------|------|-------|-----|------|-------|---------|----------|-----------|-------------|--------|----------|---------|----------|----------|----------|---------|--------|--|
| 27245-05A                                    | 0.9 | 454A | 0.13180 | 0.00069 | 2600.7   | 40.4  | 193.2   | 3.4  | -3.4  | 15.4 | -0.1  | 11.5 | 9.7   | 4.1 | 0.00 | 7.6   | -0.0052 | 0.5389   | -1.5492   | ± 6.3288    | -11.5  | -0.374   | 1.527   | 0.00374  | 42.19    | 0.07432  | 2.34    | 0.0245 |  |
| 27245-05B                                    | 5.0 | 454A | 0.13180 | 0.00069 | 14401.5  | 45.5  | 2332.8  | 8.6  | 38.9  | 13.8 | 17.4  | 11.6 | 2.0   | 4.1 | 0.03 | 92.4  | 0.0668  | 0.0448   | 5.9156    | ± 0.5238    | 95.9   | 1.426    | 0.126   | 0.00014  | 205.66   | 0.16208  | 0.49    | 0.0010 |  |
| <i>MAG14-2A-045Y-2 116-119 - Aliquot #6</i>  |     |      |         |         |          |       |         |      |       |      |       |      |       |     |      |       |         |          |           |             |        |          |         |          |          |          |         |        |  |
| 27245-06A                                    | 0.9 | 454A | 0.13180 | 0.00069 | 2149.9   | 40.9  | 214.3   | 3.5  | 6.1   | 11.3 | 7.2   | 11.6 | 3.8   | 4.1 | 0.00 | 13.7  | 0.3032  | 0.4905   | 4.6933    | ± 5.7592    | 46.8   | 1.131    | 1.388   | 0.00178  | 107.95   | 0.09974  | 2.50    | 0.0134 |  |
| 27245-06B                                    | 5.0 | 454A | 0.13180 | 0.00069 | 8738.4   | 44.3  | 1348.8  | 6.3  | 24.6  | 14.0 | 19.8  | 11.6 | 24.3  | 4.2 | 0.02 | 86.3  | 0.1324  | 0.0775   | 1.1042    | ± 0.9258    | 17.1   | 0.266    | 0.223   | 0.00278  | 17.23    | 0.15444  | 0.69    | 0.0217 |  |
| <i>MAG14-2A-045Y-2 116-119 - Aliquot #7</i>  |     |      |         |         |          |       |         |      |       |      |       |      |       |     |      |       |         |          |           |             |        |          |         |          |          |          |         |        |  |
| 27245-07A                                    | 0.9 | 454A | 0.13180 | 0.00069 | 503.0    | 41.1  | 113.0   | 2.8  | 12.0  | 16.7 | -11.4 | 11.4 | 3.1   | 4.1 | 0.00 | 8.4   | -0.9137 | 0.9139   | -3.6766   | ± 10.8965   | -82.7  | -0.887   | 2.629   | 0.00612  | 134.31   | 0.22490  | 8.53    | 0.0581 |  |
| 27245-07B                                    | 5.0 | 454A | 0.13180 | 0.00069 | 4276.7   | 41.5  | 1233.5  | 5.8  | 26.1  | 10.3 | -17.0 | 11.5 | 5.1   | 4.1 | 0.02 | 91.6  | -0.1249 | 0.0846   | 2.2243    | ± 0.9981    | 64.2   | 0.536    | 0.241   | 0.00120  | 80.42    | 0.28862  | 1.08    | 0.0109 |  |
| <i>MAG14-2A-046Y-1 006-010</i>               |     |      |         |         |          |       |         |      |       |      |       |      |       |     |      |       |         |          |           |             |        |          |         |          |          |          |         |        |  |
| 27246-01A                                    | 1.0 | 454A | 0.13200 | 0.00064 | 29.7     | 122.6 | 1.3     | 2.1  | -14.2 | 15.8 | 0.4   | 29.6 | 0.3   | 4.8 | 0.00 | 100.0 | 1.4320  | 114.0326 | -48.9208  | ± 1076.4180 | -220.2 | -11.856  | 261.709 | 0.01072  | 1559.39  | 0.04501  | 440.76  | 0.2475 |  |
| <i>MAG14-2A-046Y-1 006-010 - Aliquot #2</i>  |     |      |         |         |          |       |         |      |       |      |       |      |       |     |      |       |         |          |           |             |        |          |         |          |          |          |         |        |  |
| 27246-02A                                    | 1.0 | 454A | 0.13200 | 0.00064 | 5517.2   | 123.4 | 1442.7  | 6.2  | 21.0  | 16.1 | 55.8  | 29.6 | 7.6   | 4.8 | 0.02 | 100.0 | 0.1985  | 0.1057   | 2.2670    | ± 0.9949    | 59.3   | 0.548    | 0.240   | 0.00136  | 63.74    | 0.26157  | 2.28    | 0.0345 |  |
| <i>MAG14-2A-046Y-1 006-010 - Aliquot #3</i>  |     |      |         |         |          |       |         |      |       |      |       |      |       |     |      |       |         |          |           |             |        |          |         |          |          |          |         |        |  |
| 27246-03A                                    | 1.0 | 454A | 0.13200 | 0.00064 | 568.9    | 122.8 | 168.1   | 3.0  | -7.1  | 12.8 | -9.1  | 29.5 | 0.7   | 4.8 | 0.00 | 100.0 | -0.2793 | 0.9041   | 2.0620    | ± 8.6036    | 61.0   | 0.498    | 2.078   | 0.00131  | 649.73   | 0.29567  | 21.66   | 0.0331 |  |
| <i>MAG14-2A-046Y-1 006-010 - Aliquot #4</i>  |     |      |         |         |          |       |         |      |       |      |       |      |       |     |      |       |         |          |           |             |        |          |         |          |          |          |         |        |  |
| 27246-04A                                    | 1.0 | 454A | 0.13200 | 0.00064 | 2977.4   | 124.3 | 64.9    | 2.6  | -16.2 | 11.7 | 26.9  | 29.6 | 10.1  | 4.9 | 0.00 | 100.0 | 2.1371  | 2.3529   | -0.6705   | ± 224.4009  | -1.5   | -0.162   | 5.421   | 0.00340  | 48.20    | 0.02179  | 5.83    | 0.0620 |  |
| <i>MAG14-2A-046Y-1 006-010 - Aliquot #5</i>  |     |      |         |         |          |       |         |      |       |      |       |      |       |     |      |       |         |          |           |             |        |          |         |          |          |          |         |        |  |
| 27246-05A                                    | 1.0 | 454A | 0.13200 | 0.00064 | -93.6    | 124.3 | 1.1     | 2.7  | -28.5 | 14.3 | 2.2   | 29.7 | 3.1   | 4.8 | 0.00 | 100.0 | 10.2885 | 140.3895 | -913.6012 | ± 2587.7360 | 1080.1 | -235.172 | 710.803 | -0.03283 | -206.21  | -0.01182 | -277.87 | 0.3076 |  |
| <i>MAG14-2A-046Y-1 006-010 - Aliquot #6</i>  |     |      |         |         |          |       |         |      |       |      |       |      |       |     |      |       |         |          |           |             |        |          |         |          |          |          |         |        |  |
| 27246-06A                                    | 1.0 | 454A | 0.13200 | 0.00064 | 2503.5   | 124.1 | 625.8   | 4.5  | 2.1   | 17.0 | 19.4  | 29.6 | 5.3   | 4.7 | 0.01 | 100.0 | 0.1596  | 0.2434   | 1.4573    | ± 2.2741    | 36.4   | 0.352    | 0.549   | 0.00213  | 89.27    | 0.25006  | 5.01    | 0.0550 |  |
| <i>MAG14-2A-046Y-1 006-010 - Aliquot #7</i>  |     |      |         |         |          |       |         |      |       |      |       |      |       |     |      |       |         |          |           |             |        |          |         |          |          |          |         |        |  |
| 27246-07A                                    | 1.0 | 454A | 0.13200 | 0.00064 | 43787.2  | 129.0 | 382.5   | 3.9  | 10.2  | 17.9 | 76.6  | 29.5 | 152.1 | 4.9 | 0.01 | 100.0 | 1.0319  | 0.3983   | -4.2326   | ± 3.8628    | -3.7   | -1.023   | 0.934   | 0.00347  | 3.25     | 0.00874  | 1.05    | 0.0258 |  |
| <i>MAG14-2A-046Y-1 006-010 - Aliquot #8</i>  |     |      |         |         |          |       |         |      |       |      |       |      |       |     |      |       |         |          |           |             |        |          |         |          |          |          |         |        |  |
| 27246-08A                                    | 1.0 | 454A | 0.13200 | 0.00064 | 161547.4 | 138.2 | 4648.7  | 10.0 | 142.4 | 17.0 | 137.8 | 29.5 | 523.2 | 5.3 | 0.07 | 35.1  | 0.1524  | 0.0328   | 1.1574    | ± 0.3417    | 3.3    | 0.280    | 0.083   | 0.00324  | 1.02     | 0.02878  | 0.23    | 0.0369 |  |
| 27246-08B                                    | 1.4 | 454A | 0.13200 | 0.00064 | 61727.5  | 129.2 | 7699.2  | 14.3 | 118.2 | 20.8 | 199.4 | 29.7 | 163.3 | 5.0 | 0.11 | 57.9  | 0.1359  | 0.2003   | 1.6979    | ± 0.1955    | 21.1   | 0.410    | 0.407   | 0.00264  | -3.08    | 0.12428  | 0.28    | 0.0518 |  |
| 27246-08C                                    | 2.0 | 454A | 0.13200 | 0.00064 | 2055.8   | 122.7 | 916.9   | 5.8  | -3.1  | 19.8 | 10.9  | 29.7 | 1.7   | 4.8 | 0.01 | 6.9   | 0.0619  | 0.1697   | 2.8035    | ± 1.5723    | 125.5  | 0.677    | 0.380   | -0.00084 | -278.55  | 0.44622  | 6.00    | 0.0213 |  |
| <i>MAG14-2A-046Y-1 006-010 - Aliquot #9</i>  |     |      |         |         |          |       |         |      |       |      |       |      |       |     |      |       |         |          |           |             |        |          |         |          |          |          |         |        |  |
| 27246-09A                                    | 0.9 | 454A | 0.13200 | 0.00064 | 1515.7   | 41.3  | 107.8   | 2.7  | 27.7  | 9.2  | 20.9  | 11.6 | 6.3   | 4.1 | 0.00 | 3.6   | 1.7574  | 0.9789   | -3.3175   | ± 11.2937   | -23.6  | -0.802   | 2.729   | 0.00414  | 65.00    | 0.07111  | 3.71    | 0.0308 |  |
| 27246-09B                                    | 5.0 | 454A | 0.13200 | 0.00064 | 6610.1   | 43.2  | 2894.8  | 8.7  | 38.2  | 15.4 | 23.7  | 11.7 | 8.0   | 4.2 | 0.04 | 96.4  | 0.0736  | 0.0366   | 1.4626    | ± 0.4313    | 64.1   | 0.353    | 0.104   | 0.00120  | 52.61    | 0.43821  | 0.72    | 0.0113 |  |
| <i>MAG14-2A-046Y-1 006-010 - Aliquot #10</i> |     |      |         |         |          |       |         |      |       |      |       |      |       |     |      |       |         |          |           |             |        |          |         |          |          |          |         |        |  |
| 27246-10A                                    | 0.9 | 454A | 0.13200 | 0.00064 | 210.0    | 40.4  | 14.1    | 2.8  | 20.3  | 17.3 | -11.0 | 12.2 | -2.3  | 4.3 | 0.00 | 1.2   | -7.0034 | 7.9242   | 63.3300   | ± 91.4720   | 428.0  | 15.234   | 21.913  | -0.01099 | -187.57  | 0.06758  | 27.69   | 0.0712 |  |
| 27246-10B                                    | 5.0 | 454A | 0.13200 | 0.00064 | 4130.3   | 41.6  | 1124.8  | 5.1  | -12.4 | 7.5  | -9.4  | 11.8 | 5.6   | 4.1 | 0.02 | 98.8  | -0.0764 | 0.0949   | 2.1926    | ± 1.0967    | 59.7   | 0.530    | 0.265   | 0.00135  | 74.21    | 0.27250  | 1.11    | 0.0124 |  |
| <i>MAG14-2A-046Y-1 006-010 - Aliquot #11</i> |     |      |         |         |          |       |         |      |       |      |       |      |       |     |      |       |         |          |           |             |        |          |         |          |          |          |         |        |  |
| 27246-11A                                    | 0.9 | 454A | 0.13200 | 0.00064 | 353.3    | 38.7  | 17.1    | 2.5  | 14.7  | 14.5 | -0.9  | 11.7 | -0.9  | 4.0 | 0.00 | 1.1   | -0.4742 | 6.1929   | 35.9745   | ± 69.6769   | 174.3  | 8.669    | 16.752  | -0.00249 | -452.91  | 0.04845  | 18.32   | 0.0145 |  |
| 27246-11B                                    | 5.0 | 454A | 0.13200 | 0.00064 | 3076.5   | 40.8  | 1526.5  | 6.0  | 32.6  | 9.0  | -1.8  | 11.6 | 2.6   | 4.1 | 0.02 | 98.9  | -0.0109 | 0.0692   | 1.4962    | ± 0.8038    | 74.3   | 0.361    | 0.194   | 0.00086  | 155.19   | 0.04952  | 1.38    | 0.0082 |  |
| <i>MAG14-2A-046Y-1 006-010 - Aliquot #12</i> |     |      |         |         |          |       |         |      |       |      |       |      |       |     |      |       |         |          |           |             |        |          |         |          |          |          |         |        |  |
| 27246-12A                                    | 0.9 | 454A | 0.13200 | 0.00064 | 626.8    | 40.5  | 88.8    | 2.6  | 4.8   | 16.6 | -10.3 | 11.7 | -2.0  | 4.2 | 0.00 | 8.5   | -1.0547 | 1.1942   | 13.6530   | ± 13.9583   | 193.7  | 3.295    | 3.366   | -0.00314 | -211.25  | 0.14187  | 7.09    | 0.0279 |  |
| 27246-12B                                    | 5.0 | 454A | 0.13200 | 0.00064 | 7977.8   | 43.9  | 953.0   | 5.8  | 19.4  | 14.6 | 6.8   | 11.5 | 21.5  | 4.0 | 0.01 | 91.5  | 0.0642  | 0.1101   | 1.6378    | ± 1.2670    | 19.6   | 0.396    | 0.306   | 0.00269  | 18.82    | 0.11952  | 0.82    | 0.0197 |  |
| <i>MAG14-2A-046Y-1 006-010 - Aliquot #13</i> |     |      |         |         |          |       |         |      |       |      |       |      |       |     |      |       |         |          |           |             |        |          |         |          |          |          |         |        |  |
| 27246-13A                                    | 0.9 | 454A | 0.13200 | 0.00064 | 831.2    | 41.0  | 153.6   | 2.9  | 6.0   | 16.5 | 12.0  | 11.6 | 2.6   | 4.1 | 0.00 | 8.1   | 0.7077  | 0.6850   | 0.3491    | ± 8.0417    | 6.5    | 0.084    | 1.942   | 0.00313  | 158.92   | 0.18488  | 5.29    | 0.0290 |  |
| 27246-13B                                    | 5.0 | 454A | 0.13200 | 0.00064 | 3575.6   | 40.2  | 1731.9  | 7.3  | -4.4  | 17.6 | -1.5  | 11.6 | 0.0   | 4.1 | 0.03 | 91.9  | -0.0083 | 0.0608   | 2.0553    | ± 0.7033    | 99.6   | 0.496    | 0.170   | 0.00001  | 9041.98  | 0.48470  | 1.20    | 0.0001 |  |
| <i>MAG14-2A-046Y-1 006-010 - Aliquot #14</i> |     |      |         |         |          |       |         |      |       |      |       |      |       |     |      |       |         |          |           |             |        |          |         |          |          |          |         |        |  |
| 27246-14A                                    | 0.9 | 454A | 0.13200 | 0.00064 | 1975.9   | 39.9  | 646.8   | 4.7  | -26.1 | 17.7 | 31.3  | 11.5 | -0.2  | 4.0 | 0.01 | 41.2  | 0.4398  | 0.1625   | 3.1466    | ± 1.8610    | 103.0  | 0.760    | 0.449   | -0.00010 | -1997.76 | 0.32749  | 2.15    | 0.0010 |  |
| 27246-14B                                    | 5.0 | 454A | 0.13200 | 0.00064 | 4233.4   | 41.3  | 921.5   | 5.0  | 18.9  | 10.1 | 8.5   | 11.6 | 7.1   | 4.1 | 0.01 | 58.8  | 0.0836  | 0.1145   | 2.2901    | ± 1.3239    | 49.9   | 0.553    | 0.320   | 0.00168  | 57.51    | 0.21781  | 1.12    | 0.0149 |  |
| <i>MAG14-2A-046Y-1 006-010 - Aliquot #15</i> |     |      |         |         |          |       |         |      |       |      |       |      |       |     |      |       |         |          |           |             |        |          |         |          |          |          |         |        |  |
| 27246-15A                                    | 0.9 | 454A | 0.13200 | 0.00064 | 20526.9  | 46.2  | 1225.0  | 6.6  | 26.9  | 12.5 | 0.1   | 11.6 | 47.6  | 4.1 | 0.02 | 1.9   | 0.0002  | 0.0865   | 5.1409    | ± 1.0114    | 30.7   | 1.241    | 0.244   | 0.00232  | 8.71     | 0.05971  | 0.59    | 0.0102 |  |
| 27246-15B                                    | 5.0 | 454A | 0.13200 | 0.00064 | 474885.8 | 120.5 | 62162.5 | 51.0 | 856.9 | 26.2 | -23.6 | 11.6 | 598.7 | 4.5 | 0.93 | 98.1  | -0.0039 | 0.0017   | 4.7609    | ± 0.0222    | 62.4   | 1.150    | 0.005   | 0.00126  | 0.76     | 0.13998  | 0.09    | 0.0298 |  |
| <i>MAG14-2A-046Y-1 006-010 - Aliquot #16</i> |     |      |         |         |          |       |         |      |       |      |       |      |       |     |      |       |         |          |           |             |        |          |         |          |          |          |         |        |  |
| 27246-16A                                    | 0.9 | 454A | 0.13200 | 0.00064 | 2019.9   | 41.7  | 197.4   | 2.9  | -10.2 | 17.9 | -8.0  | 11.8 | 6.0   | 4.1 | 0.00 | 9.4   | -0.3704 | 0.5428   | 1.1344    | ± 6.2114    | 11.1   | 0.274    | 1.500   | 0.00298  | 68.92    | 0.09780  | 2.52    | 0.0241 |  |
| 27246-16B                                    | 5.0 | 454A | 0.13200 | 0.00064 | 4554.2   | 42.0  | 822.4   | 5.4  | 35.4  | 12.8 | 13.5  | 11.9 | 7.3   | 4.1 | 0.01 | 80.6  | 0.1490  | 0.1326   | 2.9005    | ± 1.5035    | 52.4   | 0.701    | 0.363   | 0.00159  | 57.05    | 0.18068  | 1.14    | 0.0132 |  |
| <i>MAG14-2A-046Y-1 006-010 - Aliquot #17</i> |     |      |         |         |          |       |         |      |       |      |       |      |       |     |      |       |         |          |           |             |        |          |         |          |          |          |         |        |  |
| 27246-17A                                    | 0.9 | 454A | 0.13200 | 0.00064 | 2356.1   | 42.2  | 157.3   | 2.8  | -23.3 | 12.0 | -15.6 | 11.9 | 9.5   | 4.1 | 0.00 | 9.7   | -9.0406 | 0.6901   | -3.0921   | ± 7.7484    | -20.7  | -0.747   | 1.872   | 0.00404  | 42.93    | 0.06683  | 2.54    | 0.0153 |  |
| 27246-17B                                    | 5.0 | 454A | 0.13200 | 0.00064 | 6299.4   | 44.3  | 1471.9  | 6.8  | 23.3  | 12.8 | 31.7  | 12.0 | 10.7  | 4.1 | 0.02 | 90.3  | 0.19664 | 0.0746   | 2.1084    | ± 0.8363    | 49.3   | 0.509    | 0.202   | 0.00170  | 38.53    | 0.23379  | 0.84    | 0.0194 |  |
| <i>MAG14-2A-046Y-1 006-010 - Aliquot #18</i> |     |      |         |         |          |       |         |      |       |      |       |      |       |     |      |       |         |          |           |             |        |          |         |          |          |          |         |        |  |
| 27246-18A                                    | 0.9 | 454A | 0.13200 | 0.00064 | 1166.0   | 42.1  | 217.2   | 3.1  | -25.8 | 15.2 | -47.2 | 12.0 | 4.2   | 4.2 | 0.00 | 15.2  |         |          |           |             |        |          |         |          |          |          |         |        |  |

|                                       |     |      |         |         |          |       |         |      |       |      |       |      |       |     |      |       |         |          |           |             |        |          |         |          |         |          |         |        |  |  |  |
|---------------------------------------|-----|------|---------|---------|----------|-------|---------|------|-------|------|-------|------|-------|-----|------|-------|---------|----------|-----------|-------------|--------|----------|---------|----------|---------|----------|---------|--------|--|--|--|
| 27245-05A                             | 0.9 | 454A | 0.13180 | 0.00069 | 2600.7   | 40.4  | 193.2   | 3.4  | -3.4  | 15.4 | -0.1  | 11.5 | 9.7   | 4.1 | 0.00 | 7.6   | -0.0052 | 0.5389   | -1.5492   | ± 6.3288    | -11.5  | -0.374   | 1.527   | 0.00374  | 42.19   | 0.07432  | 2.34    | 0.0245 |  |  |  |
| 27245-05B                             | 5.0 | 454A | 0.13180 | 0.00069 | 14401.5  | 45.5  | 2332.8  | 8.6  | 38.9  | 13.8 | 17.4  | 11.6 | 2.0   | 4.1 | 0.03 | 92.4  | 0.0668  | 0.0448   | 5.9156    | ± 0.5238    | 95.9   | 1.426    | 0.126   | 0.00014  | 205.66  | 0.16208  | 0.49    | 0.0010 |  |  |  |
| MAG14-2A-045Y-2 116-119 - Aliquot #6  |     |      |         |         |          |       |         |      |       |      |       |      |       |     |      |       |         |          |           |             |        |          |         |          |         |          |         |        |  |  |  |
| 27245-06A                             | 0.9 | 454A | 0.13180 | 0.00069 | 2149.9   | 40.9  | 214.3   | 3.5  | 6.1   | 11.3 | 7.2   | 11.6 | 3.8   | 4.1 | 0.00 | 13.7  | 0.3032  | 0.4905   | 4.6933    | ± 5.7592    | 46.8   | 1.131    | 1.388   | 0.00178  | 107.95  | 0.09974  | 2.50    | 0.0134 |  |  |  |
| 27245-06B                             | 5.0 | 454A | 0.13180 | 0.00069 | 8738.4   | 44.3  | 1348.8  | 6.3  | 24.6  | 14.0 | 19.8  | 11.6 | 24.3  | 4.2 | 0.02 | 86.3  | 0.1324  | 0.0775   | 1.1042    | ± 0.9258    | 17.1   | 0.266    | 0.223   | 0.00278  | 17.23   | 0.15444  | 0.69    | 0.0217 |  |  |  |
| MAG14-2A-045Y-2 116-119 - Aliquot #7  |     |      |         |         |          |       |         |      |       |      |       |      |       |     |      |       |         |          |           |             |        |          |         |          |         |          |         |        |  |  |  |
| 27245-07A                             | 0.9 | 454A | 0.13180 | 0.00069 | 503.0    | 41.1  | 113.0   | 2.8  | 12.0  | 16.7 | -11.4 | 11.4 | 3.1   | 4.1 | 0.00 | 8.4   | -0.9137 | 0.9139   | -3.6766   | ± 10.8965   | -82.7  | -0.887   | 2.629   | 0.00612  | 134.31  | 0.22490  | 8.53    | 0.0581 |  |  |  |
| 27245-07B                             | 5.0 | 454A | 0.13180 | 0.00069 | 4276.7   | 41.5  | 1233.5  | 5.8  | 26.1  | 10.3 | -17.0 | 11.5 | 5.1   | 4.1 | 0.02 | 91.6  | -0.1249 | 0.0846   | 2.2243    | ± 0.9981    | 64.2   | 0.536    | 0.241   | 0.00120  | 80.42   | 0.28862  | 1.08    | 0.0109 |  |  |  |
| MAG14-2A-046Y-1 006-010               |     |      |         |         |          |       |         |      |       |      |       |      |       |     |      |       |         |          |           |             |        |          |         |          |         |          |         |        |  |  |  |
| 27246-01A                             | 1.0 | 454A | 0.13200 | 0.00064 | 29.7     | 122.6 | 1.3     | 2.1  | -14.2 | 15.8 | 0.4   | 29.6 | 0.3   | 4.8 | 0.00 | 100.0 | 1.4320  | 114.0326 | -48.9208  | ± 1076.4180 | -220.2 | -11.856  | 261.709 | 0.01072  | 1559.39 | 0.04501  | 440.76  | 0.2475 |  |  |  |
| MAG14-2A-046Y-1 006-010 - Aliquot #2  |     |      |         |         |          |       |         |      |       |      |       |      |       |     |      |       |         |          |           |             |        |          |         |          |         |          |         |        |  |  |  |
| 27246-02A                             | 1.0 | 454A | 0.13200 | 0.00064 | 5517.2   | 123.4 | 1442.7  | 6.2  | 21.0  | 16.1 | 55.8  | 29.6 | 7.6   | 4.8 | 0.02 | 100.0 | 0.1985  | 0.1057   | 2.2670    | ± 0.9949    | 59.3   | 0.548    | 0.240   | 0.00136  | 63.74   | 0.26157  | 2.28    | 0.0345 |  |  |  |
| MAG14-2A-046Y-1 006-010 - Aliquot #3  |     |      |         |         |          |       |         |      |       |      |       |      |       |     |      |       |         |          |           |             |        |          |         |          |         |          |         |        |  |  |  |
| 27246-03A                             | 1.0 | 454A | 0.13200 | 0.00064 | 568.9    | 122.8 | 168.1   | 3.0  | -7.1  | 12.8 | -9.1  | 29.5 | 0.7   | 4.8 | 0.00 | 100.0 | -0.2793 | 0.9041   | 2.0620    | ± 8.6036    | 61.0   | 0.498    | 2.078   | 0.00131  | 649.73  | 0.29567  | 21.66   | 0.0331 |  |  |  |
| MAG14-2A-046Y-1 006-010 - Aliquot #4  |     |      |         |         |          |       |         |      |       |      |       |      |       |     |      |       |         |          |           |             |        |          |         |          |         |          |         |        |  |  |  |
| 27246-04A                             | 1.0 | 454A | 0.13200 | 0.00064 | 2977.4   | 124.3 | 64.9    | 2.6  | -16.2 | 11.7 | 26.9  | 29.6 | 10.1  | 4.9 | 0.00 | 100.0 | 2.1371  | 2.3529   | -0.6705   | ± 224.4009  | -1.5   | -0.162   | 5.421   | 0.00340  | 48.20   | 0.02179  | 5.83    | 0.0620 |  |  |  |
| MAG14-2A-046Y-1 006-010 - Aliquot #5  |     |      |         |         |          |       |         |      |       |      |       |      |       |     |      |       |         |          |           |             |        |          |         |          |         |          |         |        |  |  |  |
| 27246-05A                             | 1.0 | 454A | 0.13200 | 0.00064 | -93.6    | 124.3 | 1.1     | 2.7  | -28.5 | 14.3 | 2.2   | 29.7 | 3.1   | 4.8 | 0.00 | 100.0 | 10.2885 | 140.3895 | -913.6012 | ± 2587.7360 | 1080.1 | -235.172 | 710.803 | -0.03283 | -206.21 | -0.01182 | -277.87 | 0.3076 |  |  |  |
| MAG14-2A-046Y-1 006-010 - Aliquot #6  |     |      |         |         |          |       |         |      |       |      |       |      |       |     |      |       |         |          |           |             |        |          |         |          |         |          |         |        |  |  |  |
| 27246-06A                             | 1.0 | 454A | 0.13200 | 0.00064 | 2503.5   | 124.1 | 625.8   | 4.5  | 2.1   | 17.0 | 19.4  | 29.6 | 5.3   | 4.7 | 0.01 | 100.0 | 0.1596  | 0.2434   | 1.4573    | ± 2.2741    | 36.4   | 0.352    | 0.549   | 0.00213  | 89.27   | 0.25006  | 5.01    | 0.0550 |  |  |  |
| MAG14-2A-046Y-1 006-010 - Aliquot #7  |     |      |         |         |          |       |         |      |       |      |       |      |       |     |      |       |         |          |           |             |        |          |         |          |         |          |         |        |  |  |  |
| 27246-07A                             | 1.0 | 454A | 0.13200 | 0.00064 | 43787.2  | 129.0 | 382.5   | 3.9  | 10.2  | 17.9 | 76.6  | 29.5 | 152.1 | 4.9 | 0.01 | 100.0 | 1.0319  | 0.3983   | -4.2326   | ± 3.8628    | -3.7   | -1.023   | 0.934   | 0.00347  | 3.25    | 0.00874  | 1.05    | 0.0258 |  |  |  |
| MAG14-2A-046Y-1 006-010 - Aliquot #8  |     |      |         |         |          |       |         |      |       |      |       |      |       |     |      |       |         |          |           |             |        |          |         |          |         |          |         |        |  |  |  |
| 27246-08A                             | 1.0 | 454A | 0.13200 | 0.00064 | 161547.4 | 138.2 | 4648.7  | 10.0 | 142.4 | 17.0 | 137.8 | 29.5 | 523.2 | 5.3 | 0.07 | 35.1  | 0.1524  | 0.0328   | 1.1574    | ± 0.3417    | 3.3    | 0.280    | 0.083   | 0.00324  | 1.02    | 0.02878  | 0.23    | 0.0369 |  |  |  |
| 27246-08B                             | 1.4 | 454A | 0.13200 | 0.00064 | 61727.5  | 129.2 | 7699.2  | 14.3 | 118.2 | 20.8 | 199.4 | 29.7 | 163.3 | 5.0 | 0.11 | 57.9  | 0.1359  | 0.2003   | 1.6979    | ± 0.1955    | 21.1   | 0.410    | 0.407   | 0.00264  | -3.08   | 0.12428  | 0.28    | 0.0518 |  |  |  |
| 27246-08C                             | 2.0 | 454A | 0.13200 | 0.00064 | 2055.8   | 122.7 | 916.9   | 5.8  | -3.1  | 19.8 | 10.9  | 29.7 | -1.7  | 4.8 | 0.01 | 6.9   | 0.0619  | 0.1697   | 2.8035    | ± 1.5723    | 125.5  | 0.171    | 0.087   | 0.00084  | -278.55 | 0.44622  | 6.00    | 0.0213 |  |  |  |
| MAG14-2A-046Y-1 006-010 - Aliquot #9  |     |      |         |         |          |       |         |      |       |      |       |      |       |     |      |       |         |          |           |             |        |          |         |          |         |          |         |        |  |  |  |
| 27246-09A                             | 0.9 | 454A | 0.13200 | 0.00064 | 1515.7   | 41.3  | 107.8   | 2.7  | 27.7  | 9.2  | 20.9  | 11.6 | 6.3   | 4.1 | 0.00 | 3.6   | 1.7574  | 0.9789   | -3.3175   | ± 11.2937   | -23.6  | -0.802   | 2.729   | 0.00414  | 65.00   | 0.07111  | 3.71    | 0.0308 |  |  |  |
| 27246-09B                             | 5.0 | 454A | 0.13200 | 0.00064 | 6610.1   | 43.2  | 2894.8  | 8.7  | 38.2  | 15.4 | 23.7  | 11.7 | 8.0   | 4.2 | 0.04 | 96.4  | 0.0736  | 0.0366   | 1.4626    | ± 0.4313    | 64.1   | 0.353    | 0.104   | 0.00120  | 52.61   | 0.43821  | 0.72    | 0.0113 |  |  |  |
| MAG14-2A-046Y-1 006-010 - Aliquot #10 |     |      |         |         |          |       |         |      |       |      |       |      |       |     |      |       |         |          |           |             |        |          |         |          |         |          |         |        |  |  |  |
| 27246-10A                             | 0.9 | 454A | 0.13200 | 0.00064 | 210.0    | 40.4  | 14.1    | 2.8  | 20.3  | 17.3 | -11.0 | 12.2 | -2.3  | 4.3 | 0.00 | 1.2   | -7.0034 | 7.9242   | 63.3300   | ± 91.4720   | 428.0  | 15.234   | 21.913  | -0.01099 | -187.57 | 0.06758  | 27.69   | 0.0712 |  |  |  |
| 27246-10B                             | 5.0 | 454A | 0.13200 | 0.00064 | 4130.3   | 41.6  | 1124.8  | 5.1  | -12.4 | 7.5  | -9.4  | 11.8 | 5.6   | 4.1 | 0.02 | 98.8  | -0.0764 | 0.0949   | 2.1926    | ± 1.0967    | 59.7   | 0.530    | 0.265   | 0.00135  | 74.21   | 0.27250  | 1.11    | 0.0124 |  |  |  |
| MAG14-2A-046Y-1 006-010 - Aliquot #11 |     |      |         |         |          |       |         |      |       |      |       |      |       |     |      |       |         |          |           |             |        |          |         |          |         |          |         |        |  |  |  |
| 27246-11A                             | 0.9 | 454A | 0.13200 | 0.00064 | 353.3    | 38.7  | 17.1    | 2.5  | 14.7  | 14.5 | -0.9  | 11.7 | -0.9  | 4.0 | 0.00 | 1.1   | -0.4742 | 6.1929   | 35.9745   | ± 69.6769   | 174.3  | 8.669    | 16.752  | -0.00249 | -452.91 | 0.04845  | 18.32   | 0.0145 |  |  |  |
| 27246-11B                             | 5.0 | 454A | 0.13200 | 0.00064 | 3076.5   | 40.8  | 1526.5  | 6.0  | 32.6  | 9.0  | -1.8  | 11.6 | 2.6   | 4.1 | 0.02 | 98.9  | -0.0109 | 0.0692   | 1.4962    | ± 0.8038    | 74.3   | 0.361    | 0.194   | 0.00086  | 155.19  | 0.04952  | 1.38    | 0.0082 |  |  |  |
| MAG14-2A-046Y-1 006-010 - Aliquot #12 |     |      |         |         |          |       |         |      |       |      |       |      |       |     |      |       |         |          |           |             |        |          |         |          |         |          |         |        |  |  |  |
| 27246-12A                             | 0.9 | 454A | 0.13200 | 0.00064 | 626.8    | 40.5  | 88.8    | 2.6  | 4.8   | 16.6 | -10.3 | 11.7 | -2.0  | 4.2 | 0.00 | 8.5   | -1.0547 | 1.1942   | 13.6530   | ± 13.9583   | 193.7  | 3.295    | 3.366   | -0.00314 | -211.25 | 0.14187  | 7.09    | 0.0279 |  |  |  |
| 27246-12B                             | 5.0 | 454A | 0.13200 | 0.00064 | 7977.8   | 43.9  | 953.0   | 5.8  | 19.4  | 14.6 | 6.8   | 11.5 | 21.5  | 4.0 | 0.01 | 91.5  | 0.0642  | 0.1101   | 1.6378    | ± 1.2670    | 19.6   | 0.396    | 0.306   | 0.00269  | 18.82   | 0.11952  | 0.82    | 0.0197 |  |  |  |
| MAG14-2A-046Y-1 006-010 - Aliquot #13 |     |      |         |         |          |       |         |      |       |      |       |      |       |     |      |       |         |          |           |             |        |          |         |          |         |          |         |        |  |  |  |
| 27246-13A                             | 0.9 | 454A | 0.13200 | 0.00064 | 831.2    | 41.0  | 153.6   | 2.9  | 6.0   | 16.5 | 12.0  | 11.6 | 2.6   | 4.1 | 0.00 | 8.1   | 0.7077  | 0.6850   | 0.3491    | ± 8.0417    | 6.5    | 0.084    | 1.942   | 0.00313  | 158.92  | 0.18488  | 5.29    | 0.0290 |  |  |  |
| 27246-13B                             | 5.0 | 454A | 0.13200 | 0.00064 | 3575.6   | 40.2  | 1731.9  | 7.3  | -4.4  | 17.6 | -1.5  | 11.6 | 0.0   | 4.1 | 0.03 | 91.9  | -0.0083 | 0.0608   | 2.0553    | ± 0.7033    | 99.6   | 0.496    | 0.170   | 0.00001  | 9041.98 | 0.48470  | 1.20    | 0.0001 |  |  |  |
| MAG14-2A-046Y-1 006-010 - Aliquot #14 |     |      |         |         |          |       |         |      |       |      |       |      |       |     |      |       |         |          |           |             |        |          |         |          |         |          |         |        |  |  |  |
| 27246-14A                             | 0.9 | 454A | 0.13200 | 0.00064 | 1975.9   | 39.9  | 646.8   | 4.7  | -26.1 | 17.7 | 31.3  | 11.5 | -0.2  | 4.0 | 0.01 | 41.2  | 0.4398  | 0.1625   | 3.1466    | ± 1.8610    | 103.0  | 0.760    | 0.449   | -0.00010 | -197.76 | 0.32749  | 2.15    | 0.0010 |  |  |  |
| 27246-14B                             | 5.0 | 454A | 0.13200 | 0.00064 | 4233.4   | 41.3  | 921.5   | 5.0  | 18.1  | 10.1 | 8.5   | 11.6 | 7.1   | 4.1 | 0.01 | 58.8  | 0.0836  | 0.1145   | 2.2901    | ± 1.3239    | 49.9   | 0.553    | 0.320   | 0.00168  | 57.51   | 0.21781  | 1.12    | 0.0149 |  |  |  |
| MAG14-2A-046Y-1 006-010 - Aliquot #15 |     |      |         |         |          |       |         |      |       |      |       |      |       |     |      |       |         |          |           |             |        |          |         |          |         |          |         |        |  |  |  |
| 27246-15A                             | 0.9 | 454A | 0.13200 | 0.00064 | 20526.9  | 46.2  | 1225.0  | 6.6  | 26.9  | 12.5 | 0.1   | 11.6 | 47.6  | 4.1 | 0.02 | 1.9   | 0.0002  | 0.0865   | 5.1409    | ± 1.0114    | 30.7   | 1.241    | 0.244   | 0.00232  | 8.71    | 0.05971  | 0.59    | 0.0102 |  |  |  |
| 27246-15B                             | 5.0 | 454A | 0.13200 | 0.00064 | 474885.8 | 120.5 | 62162.5 | 51.0 | 856.9 | 26.2 | -23.6 | 11.6 | 598.7 | 4.5 | 0.93 | 98.1  | -0.0039 | 0.0017   | 4.7609    | ± 0.0222    | 62.4   | 1.150    | 0.005   | 0.00126  | 0.76    | 0.13998  | 0.09    | 0.0298 |  |  |  |
| MAG14-2A-046Y-1 006-010 - Aliquot #16 |     |      |         |         |          |       |         |      |       |      |       |      |       |     |      |       |         |          |           |             |        |          |         |          |         |          |         |        |  |  |  |
| 27246-16A                             | 0.9 | 454A | 0.13200 | 0.00064 | 2019.9   | 41.7  | 197.4   | 2.9  | -10.2 | 17.9 | -8.0  | 11.8 | 6.0   | 4.1 | 0.00 | 9.4   | -0.3704 | 0.5428   | 1.1344    | ± 6.2114    | 11.1   | 0.274    | 1.500   | 0.00298  | 68.92   | 0.09780  | 2.52    | 0.0241 |  |  |  |
| 27246-16B                             | 5.0 | 454A | 0.13200 | 0.00064 | 4554.2   | 42.0  | 822.4   | 5.4  | 35.4  | 12.8 | 13.5  | 11.9 | 7.3   | 4.1 | 0.01 | 80.6  | 0.1490  | 0.1326   | 2.9005    | ± 1.5035    | 52.4   | 0.701    | 0.363   | 0.00159  | 57.05   | 0.18068  | 1.14    | 0.0132 |  |  |  |
| MAG14-2A-046Y-1 006-010 - Aliquot #17 |     |      |         |         |          |       |         |      |       |      |       |      |       |     |      |       |         |          |           |             |        |          |         |          |         |          |         |        |  |  |  |
| 27246-17A                             | 0.9 | 454A | 0.13200 | 0.00064 | 2356.1   | 42.2  | 157.3   | 2.8  | -23.3 | 12.0 | -15.6 | 11.9 | 9.5   | 4.1 | 0.00 | 9.7   | -9.0466 | 0.6901   | -3.0921   | ± 7.7484    | -20.7  | -0.747   | 1.872   | 0.00404  | 42.93   | 0.06683  | 2.54    | 0.0153 |  |  |  |
| 27246-17B                             | 5.0 | 454A | 0.13200 | 0.00064 | 6299.4   | 44.3  | 1471.9  | 6.8  | 23.3  | 12.8 | 31.7  | 12.0 | 10.7  | 4.1 | 0.02 | 90.3  | 0.1966  | 0.0746   | 2.1084    | ± 0.8363    | 49.3   | 0.509    | 0.202   | 0.00170  | 38.53   | 0.23379  | 0.84    | 0.0194 |  |  |  |
| MAG14-2A-046Y-1 006-010 - Aliquot #18 |     |      |         |         |          |       |         |      |       |      |       |      |       |     |      |       |         |          |           |             |        |          |         |          |         |          |         |        |  |  |  |
| 27246-18A                             | 0.9 | 454A | 0.13200 | 0.00064 | 1166.0   | 42.1  | 217.2   | 3.1  | -25.8 | 15.2 | -47.2 | 12.0 | 4.2   | 4.2 | 0.00 | 15.2  | -1.9843 | 0.5060   | -0.5268   | ± 5.7190    | -9.8   | -0.127   | 1.342   | 0.00368  | 97.14   | 0.18651  | 3.89    | 0.0346 |  |  |  |
| 27246-18B                             | 5.0 | 454A | 0.13200 | 0.00064 | 3867.8   | 41.7  | 1210.9  | 5.7  | -12.0 | 16.4 | -12.4 | 12.1 | 7.8   | 4.2 | 0.02 | 84.8  | -0.3939 | 0.0914   | 1.2547    | ± 0.10237   | 39.3   | 0.303    | 0.287   | 0.00203  | 52.82   | 0.31327  | 1.18    | 0.0187 |  |  |  |
| MAG14-2A-046Y-1 006-010 - Aliquot #19 |     |      |         |         |          |       |         |      |       |      |       |      |       |     |      |       |         |          |           |             |        |          |         |          |         |          |         |        |  |  |  |
| 27246-19A                             | 0.9 | 454A | 0.13200 | 0.00064 | 1215.4   | 40.1  | 90.6    | 2.6  | 1.3   | 11.5 | 4.8   | 12.2 | 4.2   | 4.0 | 0.00 | 5.0   | 0.4874  | 1.2297   | -0.4263   | ± 13.1495   | -3.2   | -0.103   | 3.177   | 0.00346  | 95.06   | 0.07459  | 4.38    | 0.0261 |  |  |  |
| 27246-19B                             | 5.0 | 454A | 0.13200 | 0.00064 | 12396.8  | 43.8  | 1733.8  | 6.5  | 11.3  | 7.2  | 4.5   | 12.2 | 0.6   | 4.1 | 0.03 | 95.0  | 0.0234  | 0.0646   | 7.0395    | ± 0.7029    | 98.5   | 1.700    | 0.170   | 0.00005  | 659.08  | 0.13994  | 0.51    | 0.0004 |  |  |  |
| MAG14-2A-046Y-1 006-010 - Aliquot #20 |     |      |         |         |          |       |         |      |       |      |       |      |       |     |      |       |         |          |           |             |        |          |         |          |         |          |         |        |  |  |  |
| 27246-20A                             | 0.9 | 454A | 0.13200 | 0.00064 | 2802.9   | 40.9  | 261.9   | 3    |       |      |       |      |       |     |      |       |         |          |           |             |        |          |         |          |         |          |         |        |  |  |  |

|                                              |     |      |         |         |           |       |        |      |       |      |         |      |       |     |      |         |             |             |            |             |       |          |          |          |          |          |         |        |  |
|----------------------------------------------|-----|------|---------|---------|-----------|-------|--------|------|-------|------|---------|------|-------|-----|------|---------|-------------|-------------|------------|-------------|-------|----------|----------|----------|----------|----------|---------|--------|--|
| 27254-12A                                    | 1.0 | 454A | 0.12990 | 0.00085 | 25860.0   | 159.9 | 46.6   | 2.9  | -2.4  | 17.0 | 7222.0  | 31.3 | 77.6  | 5.2 | 0.00 | 100.0   | 1070.3620   | 91.8642     | 122.8544   | ±47.3077    | 16.1  | 28.984   | 11.073   | 0.00281  | 7.17     | 0.00131  | 8.58    | 0.0062 |  |
| <i>MAG14-2A-068Y-2 018-020 - Aliquot #13</i> |     |      |         |         |           |       |        |      |       |      |         |      |       |     |      |         |             |             |            |             |       |          |          |          |          |          |         |        |  |
| 27254-13A                                    | 1.0 | 454A | 0.12990 | 0.00085 | 17386.6   | 159.5 | 19.8   | 2.9  | 9.9   | 13.8 | 9167.7  | 32.5 | 60.1  | 5.3 | 0.00 | 100.0   | 13192.5500  | 10973.4800  | 371.6187   | ±551.3427   | 7.4   | 86.303   | 125.069  | 0.00310  | 9.87     | 0.00020  | 82.95   | 0.0010 |  |
| <i>MAG14-2A-068Y-2 018-020 - Aliquot #14</i> |     |      |         |         |           |       |        |      |       |      |         |      |       |     |      |         |             |             |            |             |       |          |          |          |          |          |         |        |  |
| 27254-14A                                    | 1.0 | 454A | 0.12990 | 0.00085 | 14940.0   | 158.7 | 15.3   | 2.9  | 26.2  | 18.8 | 3222.3  | 31.4 | 49.1  | 5.3 | 0.00 | 100.0   | 1690.3450   | 516.6180    | 97.6228    | ±168.7756   | 6.2   | 23.069   | 39.632   | 0.00314  | 11.32    | 0.00064  | 30.56   | 0.0033 |  |
| <i>MAG14-2A-068Y-2 018-020 - Aliquot #15</i> |     |      |         |         |           |       |        |      |       |      |         |      |       |     |      |         |             |             |            |             |       |          |          |          |          |          |         |        |  |
| 27254-15A                                    | 1.0 | 454A | 0.12990 | 0.00085 | 39594.9   | 161.8 | 13.3   | 2.7  | 53.9  | 17.9 | 5287.4  | 32.0 | 134.7 | 5.5 | 0.00 | 100.0   | 6874.8010   | 4803.9090   | 119.8610   | ±433.3463   | 1.2   | 28.283   | 101.469  | 0.00331  | 4.19     | 0.00010  | 69.80   | 0.0006 |  |
| <i>MAG14-2A-068Y-2 018-020 - Aliquot #16</i> |     |      |         |         |           |       |        |      |       |      |         |      |       |     |      |         |             |             |            |             |       |          |          |          |          |          |         |        |  |
| 27254-16A                                    | 1.0 | 454A | 0.12990 | 0.00085 | 13929.7   | 155.8 | 9.9    | 2.4  | 26.2  | 13.0 | 4408.8  | 31.6 | 54.3  | 5.1 | 0.00 | 100.0   | 10863.1600  | 12798.4700  | -685.0620  | ±1099.6860  | -10.0 | -170.618 | 287.055  | 0.00368  | 9.93     | 0.00015  | 117.71  | 0.0011 |  |
| <i>MAG14-2A-068Y-2 018-020 - Aliquot #17</i> |     |      |         |         |           |       |        |      |       |      |         |      |       |     |      |         |             |             |            |             |       |          |          |          |          |          |         |        |  |
| 27254-17A                                    | 1.0 | 454A | 0.12990 | 0.00085 | 28570.1   | 155.8 | 10.0   | 2.2  | 38.4  | 14.2 | 3549.0  | 31.7 | 96.6  | 5.1 | 0.00 | 100.0   | 4783.4310   | 2860.4820   | 118.8162   | ±419.3388   | 1.5   | 28.038   | 98.202   | 0.00330  | 5.47     | 0.00013  | 59.75   | 0.0009 |  |
| <i>MAG14-2A-068Y-2 018-020 - Aliquot #18</i> |     |      |         |         |           |       |        |      |       |      |         |      |       |     |      |         |             |             |            |             |       |          |          |          |          |          |         |        |  |
| 27254-18A                                    | 1.0 | 454A | 0.12990 | 0.00085 | 76613.9   | 159.7 | 30.1   | 2.4  | 62.6  | 16.1 | 4751.9  | 31.9 | 251.4 | 5.2 | 0.00 | 100.0   | 1103.2350   | 122.2626    | 116.0830   | ±73.6575    | 3.3   | 27.398   | 17.255   | 0.00324  | 2.11     | 0.00028  | 11.05   | 0.0019 |  |
| <i>MAG14-2A-068Y-2 018-020 - Aliquot #19</i> |     |      |         |         |           |       |        |      |       |      |         |      |       |     |      |         |             |             |            |             |       |          |          |          |          |          |         |        |  |
| 27254-19A                                    | 1.0 | 454A | 0.12990 | 0.00085 | 3903.1    | 152.5 | 6.0    | 2.3  | 3.9   | 16.1 | 2610.9  | 31.6 | 10.4  | 5.1 | 0.00 | 100.0   | 9653.6900   | 16489.4200  | 973.9495   | ±2008.4110  | 33.9  | 218.079  | 423.947  | 0.00221  | 59.00    | 0.00035  | 170.79  | 0.0015 |  |
| <i>MAG14-2A-068Y-2 018-020 - Aliquot #20</i> |     |      |         |         |           |       |        |      |       |      |         |      |       |     |      |         |             |             |            |             |       |          |          |          |          |          |         |        |  |
| 27254-20A                                    | 1.0 | 454A | 0.12990 | 0.00085 | 5108.5    | 152.2 | 14.0   | 2.8  | -11.7 | 18.8 | 4358.6  | 32.6 | 9.1   | 5.5 | 0.00 | 100.0   | 3502.1690   | 1584.3040   | 522.8528   | ±354.1400   | 64.0  | 120.292  | 78.857   | 0.00121  | 89.36    | 0.00122  | 45.30   | 0.0022 |  |
| <i>MAG14-2A-068Y-2 018-020 - Aliquot #21</i> |     |      |         |         |           |       |        |      |       |      |         |      |       |     |      |         |             |             |            |             |       |          |          |          |          |          |         |        |  |
| 27254-21A                                    | 1.0 | 454A | 0.12990 | 0.00085 | 18216.9   | 153.1 | 21.4   | 3.0  | 35.8  | 16.1 | 7232.8  | 33.5 | 55.9  | 5.4 | 0.00 | 100.0   | 4289.5640   | 1509.1190   | 354.6128   | ±228.2790   | 16.5  | 82.441   | 51.893   | 0.00280  | 10.64    | 0.00047  | 35.13   | 0.0019 |  |
| <i>MAG14-2A-068Y-2 018-020 - Aliquot #22</i> |     |      |         |         |           |       |        |      |       |      |         |      |       |     |      |         |             |             |            |             |       |          |          |          |          |          |         |        |  |
| 27254-22A                                    | 1.0 | 454A | 0.12990 | 0.00085 | 179177.0  | 169.2 | 21.5   | 2.7  | 126.2 | 21.8 | 10408.7 | 33.4 | 607.7 | 5.7 | 0.00 | 100.0   | 17587.3400  | 16146.6500  | -50.1841   | ±580.0855   | -0.1  | -11.964  | 138.848  | 0.00335  | 0.96     | 0.00002  | 91.44   | 0.0001 |  |
| <i>MAG14-2A-068Y-2 018-020 - Aliquot #23</i> |     |      |         |         |           |       |        |      |       |      |         |      |       |     |      |         |             |             |            |             |       |          |          |          |          |          |         |        |  |
| 27254-23A                                    | 1.0 | 454A | 0.12990 | 0.00085 | 168787.5  | 161.1 | 68.8   | 3.1  | 215.2 | 27.0 | 7438.8  | 32.4 | 569.1 | 5.5 | 0.00 | 100.0   | 672.9536    | 37.7849     | 6.7909     | ±29.7441    | 0.2   | 1.614    | 7.067    | 0.00334  | 0.98     | 0.00033  | 5.59    | 0.0020 |  |
| <i>MAG14-2A-068Y-2 018-020 - Aliquot #24</i> |     |      |         |         |           |       |        |      |       |      |         |      |       |     |      |         |             |             |            |             |       |          |          |          |          |          |         |        |  |
| 27254-24A                                    | 1.0 | 454A | 0.12990 | 0.00085 | 24842.9   | 152.8 | 10.8   | 3.2  | 88.2  | 12.4 | 4035.2  | 32.1 | 86.0  | 5.3 | 0.00 | 100.0   | 5609.9290   | 4965.9670   | -1.1907    | ±437.5325   | 0.0   | -0.283   | 104.061  | 0.00335  | 6.37     | 0.00015  | 88.48   | 0.0007 |  |
| <i>MAG14-2A-068Y-2 018-020 - Aliquot #25</i> |     |      |         |         |           |       |        |      |       |      |         |      |       |     |      |         |             |             |            |             |       |          |          |          |          |          |         |        |  |
| 27254-25A                                    | 1.0 | 454A | 0.12990 | 0.00085 | 34834.5   | 148.3 | 12.8   | 2.3  | 29.7  | 14.3 | 3046.5  | 31.5 | 123.7 | 4.9 | 0.00 | 100.0   | 2087.7220   | 652.2637    | -202.2764  | ±211.6557   | -4.3  | -48.744  | 51.690   | 0.00349  | 4.09     | 0.00021  | 31.21   | 0.0014 |  |
| <i>MAG14-2A-068Y-2 018-020 - Aliquot #26</i> |     |      |         |         |           |       |        |      |       |      |         |      |       |     |      |         |             |             |            |             |       |          |          |          |          |          |         |        |  |
| 27254-26A                                    | 1.0 | 454A | 0.12990 | 0.00085 | 24092.7   | 149.3 | 7.7    | 2.7  | 23.0  | 23.8 | 2496.8  | 31.4 | 88.4  | 5.3 | 0.00 | 100.0   | 3912.7600   | 3348.3590   | -560.3164  | ±687.2175   | -7.5  | -138.342 | 176.251  | 0.00360  | 6.11     | 0.00013  | 85.55   | 0.0007 |  |
| <i>MAG14-2A-068Y-2 018-020 - Aliquot #27</i> |     |      |         |         |           |       |        |      |       |      |         |      |       |     |      |         |             |             |            |             |       |          |          |          |          |          |         |        |  |
| 27254-27A                                    | 1.0 | 454A | 0.12990 | 0.00085 | 10814.4   | 143.4 | 5.1    | 2.1  | 6.6   | 17.9 | 3107.6  | 31.1 | 42.9  | 5.0 | 0.00 | 100.0   | -33447.9900 | 152705.4000 | 2929.8500  | ±13755.9800 | -12.7 | 590.372  | 2369.223 | 0.00377  | 12.34    | -0.00004 | -456.28 | 0.0003 |  |
| <i>MAG14-2A-068Y-2 018-020 - Aliquot #28</i> |     |      |         |         |           |       |        |      |       |      |         |      |       |     |      |         |             |             |            |             |       |          |          |          |          |          |         |        |  |
| 27254-28A                                    | 1.0 | 454A | 0.12990 | 0.00085 | 16071.7   | 141.7 | 17.6   | 2.4  | 17.6  | 18.8 | 4300.4  | 31.3 | 62.0  | 4.9 | 0.00 | 100.0   | 2191.3940   | 530.9958    | -158.9098  | ±154.9094   | -9.8  | -38.184  | 37.614   | 0.00368  | 8.42     | 0.00062  | 24.21   | 0.0038 |  |
| <i>MAG14-2A-068Y-2 018-020 - Aliquot #29</i> |     |      |         |         |           |       |        |      |       |      |         |      |       |     |      |         |             |             |            |             |       |          |          |          |          |          |         |        |  |
| 27254-29A                                    | 1.0 | 454A | 0.12990 | 0.00085 | 193778.0  | 156.3 | 7636.9 | 14.6 | 214.7 | 14.2 | 6.1     | 30.7 | 619.3 | 5.4 | 0.11 | 100.0   | 0.0036      | 0.0203      | 1.1614     | ±0.2119     | 4.6   | 0.276    | 0.050    | 0.00320  | 0.88     | 0.03942  | 0.21    | 0.0433 |  |
| <i>MAG14-2A-068Y-2 018-020 - Aliquot #30</i> |     |      |         |         |           |       |        |      |       |      |         |      |       |     |      |         |             |             |            |             |       |          |          |          |          |          |         |        |  |
| 27254-30A                                    | 1.0 | 454A | 0.12990 | 0.00085 | 78930.1   | 151.5 | 47.3   | 3.0  | 70.7  | 16.1 | 13850.7 | 33.9 | 265.9 | 5.3 | 0.00 | 100.0   | 3094.7190   | 414.6005    | 105.2447   | ±71.7802    | 3.0   | 24.857   | 16.839   | 0.00325  | 2.07     | 0.00029  | 13.32   | 0.0014 |  |
| <i>MAG14-2A-068Y-2 018-020 - Aliquot #31</i> |     |      |         |         |           |       |        |      |       |      |         |      |       |     |      |         |             |             |            |             |       |          |          |          |          |          |         |        |  |
| 27254-31A                                    | 1.0 | 454A | 0.12990 | 0.00085 | 19623.6   | 140.3 | 2827.2 | 9.0  | 45.1  | 14.8 | 60.1    | 30.4 | 31.4  | 4.8 | 0.04 | 100.0   | 0.1068      | 0.0542      | 3.6316     | ±0.5139     | 52.3  | 0.863    | 0.122    | 0.00160  | 15.48    | 0.14412  | 0.78    | 0.0422 |  |
| <i>MAG14-2A-068Y-2 018-020 - Aliquot #32</i> |     |      |         |         |           |       |        |      |       |      |         |      |       |     |      |         |             |             |            |             |       |          |          |          |          |          |         |        |  |
| 27254-32A                                    | 1.0 | 454A | 0.12990 | 0.00085 | 170203.7  | 153.7 | 2835.9 | 9.1  | 150.6 | 13.4 | 14.8    | 30.3 | 558.0 | 5.5 | 0.04 | 100.0   | 0.0259      | 0.0539      | 1.2737     | ±0.5839     | 2.1   | 0.303    | 0.139    | 0.00328  | 0.99     | 0.01667  | 0.33    | 0.0290 |  |
| <i>MAG14-2A-068Y-2 018-020 - Aliquot #33</i> |     |      |         |         |           |       |        |      |       |      |         |      |       |     |      |         |             |             |            |             |       |          |          |          |          |          |         |        |  |
| 27254-33A                                    | 1.0 | 454A | 0.12990 | 0.00085 | 8906.8    | 139.9 | 1554.8 | 6.4  | 13.9  | 14.8 | -5.9    | 30.3 | 3.3   | 5.0 | 0.02 | 100.0   | -0.0194     | 0.0983      | 5.0914     | ±0.9548     | 88.9  | 1.210    | 0.227    | 0.00037  | 149.67   | 0.17463  | 1.62    | 0.0102 |  |
| <i>MAG14-2A-068Y-2 018-020 - Aliquot #34</i> |     |      |         |         |           |       |        |      |       |      |         |      |       |     |      |         |             |             |            |             |       |          |          |          |          |          |         |        |  |
| 27439-01A                                    | 0.9 | 463A | 0.26810 | 0.00115 | 7466.0    | 171.9 | 38.9   | 12.1 | 48.8  | 14.7 | 25.1    | 17.6 | -0.2  | 3.9 | 0.00 | 50.7    | 2.6198      | 2.0135      | 194.0071   | ±67.5076    | 101.0 | 92.816   | 31.491   | -0.00004 | -1475.61 | 0.00521  | 31.27   | 0.0001 |  |
| 27439-01B                                    | 6.0 | 463A | 0.26810 | 0.00115 | 69945.5   | 179.7 | 37.9   | 11.8 | 37.7  | 7.2  | 13.3    | 16.1 | 9.5   | 3.9 | 0.00 | 49.3    | 1.4282      | 1.7877      | 1771.5660  | ±550.8593   | 95.9  | 711.357  | 183.273  | 0.00014  | 41.18    | 0.00054  | 31.05   | 0.0001 |  |
| <i>MAG14-2A-068Y-2 018-020 - Aliquot #35</i> |     |      |         |         |           |       |        |      |       |      |         |      |       |     |      |         |             |             |            |             |       |          |          |          |          |          |         |        |  |
| 27439-02A                                    | 0.9 | 463A | 0.26810 | 0.00115 | 717.0     | 164.4 | 134.9  | 11.2 | 9.4   | 10.1 | -4.8    | 15.4 | 0.2   | 3.1 | 0.00 | 1.6     | -0.1460     | 0.4627      | 4.7603     | ±7.0048     | 89.6  | 2.335    | 3.433    | 0.00035  | 12.94    | 0.18825  | 24.39   | 0.0173 |  |
| 27439-02B                                    | 6.0 | 463A | 0.26810 | 0.00115 | 19025.6   | 164.2 | 8184.0 | 16.8 | 99.6  | 12.7 | 367.7   | 15.0 | 8.3   | 3.2 | 0.16 | 98.4    | 0.1828      | 0.0075      | 2.0282     | ±0.1199     | 87.3  | 0.995    | 0.597    | 0.00043  | 39.44    | 0.43029  | 0.89    | 0.0210 |  |
| <i>MAG14-2A-068Y-2 018-020 - Aliquot #36</i> |     |      |         |         |           |       |        |      |       |      |         |      |       |     |      |         |             |             |            |             |       |          |          |          |          |          |         |        |  |
| 27439-03A                                    | 0.9 | 463A | 0.26810 | 0.00115 | 23766.7   | 171.7 | 185.4  | 12.9 | 53.0  | 23.1 | 71.7    | 18.7 | 0.9   | 3.9 | 0.00 | 8.6     | 1.5705      | 0.4246      | 126.8851   | ±10.8657    | 98.9  | 61.233   | 5.157    | 0.00004  | 456.78   | 0.00780  | 7.02    | 0.0002 |  |
| 27439-03B                                    | 6.0 | 463A | 0.26810 | 0.00115 | 1532713.0 | 519.6 | 1960.7 | 16.8 | 93.1  | 11.1 | 3914.3  | 29.6 | 13.1  | 4.2 | 0.04 | 91.4    | 8.1650      | 0.0936      | 782.0922   | ±6.7633     | 99.8  | 348.436  | 2.744    | 0.00001  | 38.61    | 0.00128  | 0.86    | 0.0001 |  |
| <i>MAG14-2A-068Y-2 018-020 - Aliquot #37</i> |     |      |         |         |           |       |        |      |       |      |         |      |       |     |      |         |             |             |            |             |       |          |          |          |          |          |         |        |  |
| 27439-04A                                    | 0.9 | 463A | 0.26810 | 0.00115 | 32562.0   | 168.8 | -21.4  | 11.0 | -22.1 | 11.6 | -1.5    | 14.5 | 9.2   | 3.1 | 0.00 | 2568.7  | 0.2802      | 2.7627      | -1391.3970 | ±716.6162   | 91.5  | -854.624 | 500.983  | 0.00028  | 33.68    | -0.00066 | -51.41  | 0.0002 |  |
| 27439-04B                                    | 6.0 | 463A | 0.26810 | 0.00115 | 39570.9   | 192.9 | 20.6   | 12.2 | 25.8  | 12.3 | -5.2    | 22.5 | 1.5   | 4.0 | 0.00 | -2468.7 | -1.0328     | 4.5020      | 1898.9810  | ±1125.9600  | 98.9  | 753.265  | 366.131  | 0.00004  | 265.94   | 0.00052  | 59.21   | 0.0000 |  |
| <i>MAG14-2A-068Y-2 018-020 - Aliquot #38</i> |     |      |         |         |           |       |        |      |       |      |         |      |       |     |      |         |             |             |            |             |       |          |          |          |          |          |         |        |  |
| 27439-05A                                    | 0.9 | 463A | 0.26810 | 0.00115 | 5078.5    | 160.3 | -19.4  | 11.0 | -7.9  | 10.5 | -17.5   | 15.2 | 0.1   | 3.3 | 0.00 | 413.2   | 3.6655      | 3.7941      | -259.4623  | ±155.0642   | 99.1  | -131.978 | 81.788   | 0.00003  | 2214.76  | -0.00382 | 56.56   | 0.0001 |  |
| 27439-05B                                    | 6.0 | 463A | 0.26810 | 0.00115 | 17827.9   | 172.6 | 14.7   | 12.1 | 29.9  | 10.0 | -17.7   | 18.8 | 4.2   | 4.1 | 0.00 | -313.2  | -4.9035     | 6.5753      | 1122.5550  | ±924.7289   | 92.9  | 481.590  | 348.816  | 0.00024  | 97.29    | 0.00083  | 82.04   | 0.0001 |  |
| <i>MAG14-2A-068Y-2 018-020 - Aliquot #39</i> |     |      |         |         |           |       |        |      |       |      |         |      |       |     |      |         |             |             |            |             |       |          |          |          |          |          |         |        |  |
| 27439-06A                                    | 0.9 | 463A | 0.26810 | 0.00115 | 231960.0  | 192.3 | 93.1   | 12.5 | 59.2  | 10.3 | -2.8    | 16.7 | 61.2  | 4.6 | 0.00 | 15.9    | -0.1244     | 0.7307      | 2293.9850  | ±307.9509   | 92.1  | 877.402  | 93.570   | 0.00026  | 7.52     | 0.00040  | 13.41   | 0.0001 |  |
| 27439-06B                                    | 6.0 | 463A | 0.26810 | 0.00115 | 494863.1  | 268.4 | 492.0  | 13.2 | 62.0  | 12.5 | 71.5    | 16.1 | 23.0  | 3.9 | 0.01 | 84.1    | 0.5938      | 0.1348      | 991.7995   | ±26.6703    | 98.6  | 431.591  | 10.339   | 0.00005  | 17.20    | 0.00099  | 2.68    | 0.0001 |  |
| <i>MAG14-2A-068Y-2 018-020 - Aliquot #40</i> |     |      |         |         |           |       |        |      |       |      |         |      |       |     |      |         |             |             |            |             |       |          |          |          |          |          |         |        |  |
| 27439-07A                                    | 0.9 | 463A | 0.26810 | 0.00115 | 1444.4    | 158.1 | 126.7  | 11.1 | -1.2  | 8.2  | -8.4    | 14.0 | 3.2   | 3.2 | 0.00 | 1.4     | -0.2685     | 0.4507      | 3.7463     | ±7.5696     | 32.9  | 1.838    | 3.711    | 0.00225  | 98.14    | 0.08776  | 14.00   | 0.0872 |  |
| 27439-07B                                    | 6.0 | 463A | 0.26810 | 0.00115 | 15866.7   | 165.8 | 9037.5 | 17.9 | 121.5 | 12.7 | 143.8   | 14.7 | 8.2   | 3.3 | 0.18 | 98.6    | 0.0646      | 0.0067      | 1.4868     | ±0.1096     | 84.7  | 0.729    | 0.054    | 0.00051  | 40.28    | 0.56981  |         |        |  |

|                                             |     |      |         |         |          |       |        |      |        |      |        |      |      |     |      |      |         |        |          |          |       |        |       |           |          |         |       |        |
|---------------------------------------------|-----|------|---------|---------|----------|-------|--------|------|--------|------|--------|------|------|-----|------|------|---------|--------|----------|----------|-------|--------|-------|-----------|----------|---------|-------|--------|
| 27457-02B                                   | 8.0 | 464A | 0.13540 | 0.00038 | 8680.0   | 328.3 | 6152.5 | 24.8 | 63.8   | 17.2 | 88.6   | 19.6 | 16.5 | 4.6 | 0.14 | 89.2 | 0.0381  | 0.0085 | 0.6106   | ± 0.2292 | 43.3  | 0.151  | 0.057 | 0.00190   | 28.12    | 0.70900 | 3.80  | 0.1338 |
| <i>MAG14-2A-046Y-2 084-096 - Aliquot #3</i> |     |      |         |         |          |       |        |      |        |      |        |      |      |     |      |      |         |        |          |          |       |        |       |           |          |         |       |        |
| 27457-03A                                   | 1.0 | 464A | 0.13540 | 0.00038 | 961.7    | 320.6 | 305.7  | 11.5 | 2.9    | 10.3 | 40.2   | 15.3 | -3.0 | 3.4 | 0.01 | 9.7  | 0.3472  | 0.1332 | 6.1017   | ± 3.5352 | 194.0 | 1.511  | 0.875 | - 0.00315 | -118.73  | 0.31787 | 33.55 | 0.2790 |
| 27457-03B                                   | 8.0 | 464A | 0.13540 | 0.00038 | 4025.5   | 309.3 | 2849.8 | 16.9 | -0.2   | 14.2 | 4.7    | 19.4 | 3.4  | 3.5 | 0.06 | 90.3 | 0.0040  | 0.0183 | 1.0573   | ± 0.3816 | 74.9  | 0.262  | 0.095 | 0.00084   | 103.38   | 0.70814 | 7.71  | 0.0741 |
| <i>MAG14-2A-046Y-2 084-096 - Aliquot #4</i> |     |      |         |         |          |       |        |      |        |      |        |      |      |     |      |      |         |        |          |          |       |        |       |           |          |         |       |        |
| 27457-04A                                   | 1.0 | 464A | 0.13540 | 0.00038 | 997.1    | 321.1 | 125.9  | 11.7 | 48.2   | 13.8 | 47.1   | 16.1 | 3.9  | 3.6 | 0.00 | 7.6  | 0.9887  | 0.3509 | - 1.3809 | ± 8.8305 | -17.4 | -0.342 | 2.188 | 0.00393   | 96.40    | 0.12623 | 33.51 | 0.3210 |
| 27457-04B                                   | 8.0 | 464A | 0.13540 | 0.00038 | 3358.0   | 311.7 | 1530.5 | 16.1 | 159.1  | 56.0 | -36.4  | 19.6 | 4.9  | 4.2 | 0.03 | 92.4 | -0.0642 | 0.0344 | 1.2312   | ± 0.8351 | 56.1  | 0.305  | 0.207 | 0.00147   | 84.66    | 0.45589 | 9.34  | 0.1090 |
| <i>MAG14-2A-046Y-2 084-096 - Aliquot #5</i> |     |      |         |         |          |       |        |      |        |      |        |      |      |     |      |      |         |        |          |          |       |        |       |           |          |         |       |        |
| 27457-05A                                   | 1.0 | 464A | 0.13540 | 0.00038 | 15179.2  | 325.6 | 724.6  | 12.1 | 62.0   | 12.5 | 36.7   | 15.5 | 45.9 | 3.8 | 0.02 | 7.4  | 0.1337  | 0.0565 | 2.0610   | ± 1.6483 | 9.8   | 0.510  | 0.408 | 0.00302   | 8.66     | 0.04774 | 2.72  | 0.1953 |
| 27457-05B                                   | 8.0 | 464A | 0.13540 | 0.00038 | 17280.1  | 312.1 | 9059.4 | 20.1 | 93.6   | 16.3 | 118.4  | 18.5 | 13.2 | 3.5 | 0.20 | 92.6 | 0.0346  | 0.0055 | 1.4721   | ± 0.1204 | 77.2  | 0.365  | 0.030 | 0.00076   | 26.57    | 0.52439 | 1.82  | 0.0675 |
| <i>MAG14-2A-046Y-2 084-096 - Aliquot #6</i> |     |      |         |         |          |       |        |      |        |      |        |      |      |     |      |      |         |        |          |          |       |        |       |           |          |         |       |        |
| 27457-06A                                   | 1.0 | 464A | 0.13540 | 0.00038 | 832.4    | 322.9 | 168.5  | 11.8 | 37.0   | 10.7 | 5.8    | 16.6 | 2.4  | 3.9 | 0.00 | 6.7  | 0.0905  | 0.2610 | 0.6136   | ± 7.0970 | 12.4  | 0.152  | 1.758 | 0.00293   | 162.66   | 0.20246 | 39.43 | 0.2347 |
| 27457-06B                                   | 8.0 | 464A | 0.13540 | 0.00038 | 5922.0   | 306.3 | 2350.8 | 16.2 | 99.5   | 20.8 | 71.5   | 18.7 | 8.8  | 3.6 | 0.05 | 93.3 | 0.0813  | 0.0214 | 1.4106   | ± 0.4754 | 56.0  | 0.349  | 0.118 | 0.00147   | 41.57    | 0.39703 | 5.22  | 0.1233 |
| <i>MAG14-2A-046Y-2 084-096 - Aliquot #7</i> |     |      |         |         |          |       |        |      |        |      |        |      |      |     |      |      |         |        |          |          |       |        |       |           |          |         |       |        |
| 27457-07A                                   | 1.0 | 464A | 0.13540 | 0.00038 | 1032.0   | 318.7 | 76.6   | 12.1 | 33.2   | 16.4 | 25.7   | 17.7 | 0.9  | 3.5 | 0.00 | 4.3  | 0.8875  | 0.6283 | 9.9196   | ±14.4165 | 73.6  | 2.456  | 3.567 | 0.00088   | 387.11   | 0.07422 | 34.69 | 0.0710 |
| 27457-07B                                   | 8.0 | 464A | 0.13540 | 0.00038 | 3785.5   | 308.1 | 1701.1 | 14.5 | 515.9  | 37.0 | 90.8   | 18.7 | -0.2 | 4.1 | 0.04 | 95.7 | 0.1430  | 0.0296 | 2.2619   | ± 0.7377 | 101.7 | 0.560  | 0.183 | - 0.00006 | -1932.83 | 0.44944 | 8.18  | 0.0042 |
| <i>MAG14-2A-046Y-2 084-096 - Aliquot #8</i> |     |      |         |         |          |       |        |      |        |      |        |      |      |     |      |      |         |        |          |          |       |        |       |           |          |         |       |        |
| 27457-08A                                   | 1.0 | 464A | 0.13540 | 0.00038 | 8039.7   | 332.6 | 67.4   | 12.7 | 107.4  | 12.5 | 293.6  | 19.1 | 16.0 | 4.7 | 0.00 | 13.0 | 11.5992 | 2.3269 | 49.0650  | ±23.5032 | 41.0  | 12.115 | 5.784 | 0.00198   | 30.02    | 0.00835 | 19.42 | 0.0294 |
| 27457-08B                                   | 8.0 | 464A | 0.13540 | 0.00038 | 138873.4 | 376.8 | 449.3  | 24.2 | -250.4 | 33.2 | 8875.1 | 39.7 | 10.8 | 4.7 | 0.01 | 87.0 | 54.1030 | 2.9856 | 309.8273 | ±17.3538 | 98.4  | 75.187 | 4.126 | 0.00005   | 61.68    | 0.00318 | 5.51  | 0.0002 |
| <i>MAG14-2A-046Y-2 084-096 - Aliquot #9</i> |     |      |         |         |          |       |        |      |        |      |        |      |      |     |      |      |         |        |          |          |       |        |       |           |          |         |       |        |
| 27457-09A                                   | 1.0 | 464A | 0.13540 | 0.00038 | 2302.6   | 325.0 | 349.1  | 12.4 | 44.7   | 9.9  | -26.6  | 17.9 | 4.4  | 3.4 | 0.01 | 9.5  | -0.2029 | 0.1359 | 2.8109   | ± 3.0679 | 42.6  | 0.696  | 0.760 | 0.00192   | 78.51    | 0.15166 | 14.56 | 0.1743 |
| 27457-09B                                   | 8.0 | 464A | 0.13540 | 0.00038 | 6238.7   | 312.1 | 3320.2 | 28.4 | -632.9 | 20.2 | -201.5 | 33.0 | 9.5  | 3.8 | 0.07 | 90.5 | -0.1635 | 0.0268 | 1.0186   | ± 0.3548 | 54.2  | 0.252  | 0.088 | 0.00153   | 40.10    | 0.53236 | 5.08  | 0.1230 |

**Table S5. Incremental heating and isochron data.**

| Sample Information |                         |       | Integrated Gas |                    |                                                 |                                                      |        | Incremental Heating Plateau |            |       |       |      | Inverse Isochron |        |              |   |          |          |                                                 |                                                      |      |       |        |              |
|--------------------|-------------------------|-------|----------------|--------------------|-------------------------------------------------|------------------------------------------------------|--------|-----------------------------|------------|-------|-------|------|------------------|--------|--------------|---|----------|----------|-------------------------------------------------|------------------------------------------------------|------|-------|--------|--------------|
| Lab ID             | Sample                  | Group | n              | M <sup>39</sup> Ar | <sup>40</sup> Ar/ <sup>39</sup> Ar <sub>K</sub> | <sup>40</sup> Ar/ <sup>39</sup> Ar <sub>K</sub> ± 1σ | Age    | Age ± 1σ SD                 | n          | Steps | % Gas | MSWD | Prob.            | Age    | Age ± 1σ MSE | n | Ca/K     | ± Ca/K   | <sup>40</sup> Ar/ <sup>39</sup> Ar <sub>h</sub> | <sup>40</sup> Ar/ <sup>39</sup> Ar <sub>h</sub> ± 1σ | MSWD | Prob. | Age    | Age ± 1σ MSE |
| 26963-01           | MAG14-2A-102Q-1 104-119 | 6     | 5              | 1.57E-15           | 4.34955                                         | 0.011934                                             | 1.0778 | 0.0030                      | No plateau |       |       |      |                  |        |              | 5 | 0.06447  | 0.00056  | 290                                             | 3.2                                                  | 0.38 | 0.77  | 1.0769 | 0.0022       |
| 26963-02           | MAG14-2A-102Q-1 104-119 | 6     | 7              | 3.29E-15           | 4.328672                                        | 0.007319                                             | 1.0726 | 0.0018                      | 5          | B-F   | 82.3  | 2.00 | 0.09             | 1.0730 | 0.0024       | 5 | 0.04753  | 0.00076  | 304.9                                           | 6.6                                                  | 0.16 | 0.93  | 1.0629 | 0.0032       |
| 26963-03           | MAG14-2A-102Q-1 104-119 | 6     | 5              | 2.03E-15           | 4.303966                                        | 0.009486                                             | 1.0665 | 0.0023                      | 5          | A-E   | 100   | 0.40 | 0.84             | 1.0652 | 0.0021       | 5 | 0.04831  | 0.00105  | 288.5                                           | 7.4                                                  | 1.29 | 0.28  | 1.0752 | 0.0028       |
| 26963-04           | MAG14-2A-102Q-1 104-119 | 6     | 6              | 2.71E-15           | 4.352403                                        | 0.00743                                              | 1.0785 | 0.0018                      | No plateau |       |       |      |                  |        |              | 6 | 0.01196  | 0.00041  | 298.2                                           | 1.7                                                  | 1.74 | 0.14  | 0.3167 | 0.0024       |
| 26964-01           | MAG14-2A-045Y-2 000-021 | 1     | 7              | 4.54E-15           | 1.284344                                        | 0.009738                                             | 0.3181 | 0.0024                      | 6          | A-F   | 96    | 1.40 | 0.22             | 0.3164 | 0.0018       | 6 | 0.01196  | 0.00041  | 298.2                                           | 1.7                                                  | 1.74 | 0.14  | 0.3167 | 0.0024       |
| 26964-02           | MAG14-2A-045Y-2 000-021 | 1     | 8              | 7.03E-15           | 1.284948                                        | 0.006846                                             | 0.3183 | 0.0017                      | 8          | A-H   | 100   | 0.90 | 0.50             | 0.3160 | 0.0005       | 8 | 0.04806  | 0.00025  | 300.8                                           | 1.7                                                  | 0.77 | 0.60  | 0.3158 | 0.0006       |
| 26964-03           | MAG14-2A-045Y-2 000-021 | 1     | 5              | 1.70E-15           | 1.293262                                        | 0.022101                                             | 0.3203 | 0.0055                      | 5          | A-E   | 100   | 0.90 | 0.47             | 0.3211 | 0.0039       | 5 | 0.05499  | 0.00085  | 297.4                                           | 1.9                                                  | 1.06 | 0.37  | 0.3233 | 0.0054       |
| 26964-04           | MAG14-2A-045Y-2 000-021 | 1     | 6              | 4.90E-15           | 1.321742                                        | 0.008239                                             | 0.3274 | 0.0020                      | 4          | A-D   | 65    | 2.30 | 0.07             | 0.3302 | 0.0031       | 4 | 0.04817  | 0.00038  | 299.6                                           | 2.3                                                  | 3.15 | 0.04  | 0.3283 | 0.0057       |
| 26964-05           | MAG14-2A-045Y-2 000-021 | 1     | 7              | 1.59E-15           | 1.258971                                        | 0.014593                                             | 0.3119 | 0.0036                      | 6          | A-F   | 100   | 1.00 | 0.40             | 0.3115 | 0.0033       | 6 | 0.05225  | 0.00101  | 295.7                                           | 2.3                                                  | 0.93 | 0.45  | 0.3158 | 0.0047       |
| 26964-06           | MAG14-2A-045Y-2 000-021 | 1     | 5              | 1.39E-15           | 1.378828                                        | 0.015395                                             | 0.3415 | 0.0038                      | 5          | A-E   | 100   | 1.50 | 0.21             | 0.3397 | 0.0035       | 5 | 0.03126  | 0.00137  | 303.3                                           | 2.3                                                  | 0.49 | 0.69  | 0.3342 | 0.0040       |
| 26964-07           | MAG14-2A-045Y-2 000-021 | 1     | 5              | 1.87E-15           | 1.242624                                        | 0.011807                                             | 0.3078 | 0.0029                      | No plateau |       |       |      |                  |        |              | 6 | 0.04706  | 0.00250  | 276.8                                           | 15.5                                                 | 1.31 | 0.27  | 0.3367 | 0.0110       |
| 26964-08           | MAG14-2A-045Y-2 000-021 | 1     | 6              | 1.19E-15           | 1.302165                                        | 0.01766                                              | 0.3226 | 0.0044                      | 6          | A-F   | 100   | 1.50 | 0.19             | 0.3218 | 0.0044       | 6 | 0.04706  | 0.00250  | 276.8                                           | 15.5                                                 | 1.31 | 0.27  | 0.3367 | 0.0110       |
| 26964-09           | MAG14-2A-045Y-2 000-021 | 1     | 5              | 2.08E-15           | 1.272455                                        | 0.010365                                             | 0.3152 | 0.0026                      | 5          | A-E   | 100   | 1.70 | 0.14             | 0.3175 | 0.0027       | 5 | 0.04683  | 0.00088  | 294.4                                           | 2.5                                                  | 1.21 | 0.30  | 0.3212 | 0.0031       |
| 26964-10           | MAG14-2A-045Y-2 000-021 | 1     | 6              | 5.30E-15           | 1.294993                                        | 0.005757                                             | 0.3208 | 0.0014                      | 5          | B-F   | 99.7  | 1.60 | 0.18             | 0.3234 | 0.0011       | 5 | 0.04563  | 0.00046  | 298.4                                           | 1.9                                                  | 1.07 | 0.10  | 0.3235 | 0.0019       |
| 27186-01           | MAG14-2A-045Y-2 063-076 | 2     | 6              | 3.80E-16           | 1.32088                                         | 0.047568                                             | 0.3400 | 0.0120                      | No plateau |       |       |      |                  |        |              | 5 | 0.01535  | 0.10107  | 268                                             | 17.1                                                 | 0.49 | 0.69  | 1.7119 | 0.0054       |
| 27186-02           | MAG14-2A-045Y-2 063-076 | 2     | 5              | 4.21E-16           | 1.59776                                         | 0.038373                                             | 0.1690 | 0.0099                      | 5          | A-E   | 100   | 1.00 | 0.39             | 1.7099 | 0.0059       | 5 | 0.01535  | 0.10107  | 268                                             | 17.1                                                 | 0.49 | 0.69  | 1.7119 | 0.0054       |
| 27186-03           | MAG14-2A-045Y-2 063-076 | 2     | 6              | 5.80E-16           | 1.120269                                        | 0.047809                                             | 0.2880 | 0.0120                      | 4          | C-F   | 66.4  | 1.60 | 0.18             | 0.3645 | 0.0104       | 4 | -0.15945 | 0.16565  | 223.1                                           | 27.4                                                 | 0.19 | 0.83  | 0.3955 | 0.0130       |
| 27186-04           | MAG14-2A-045Y-2 063-076 | 2     | 7              | 6.97E-16           | 1.524658                                        | 0.031057                                             | 0.3925 | 0.0080                      | 4          | D-G   | 63.8  | 0.30 | 0.81             | 0.3430 | 0.0075       | 4 | -0.16692 | 0.18011  | 299.4                                           | 62.7                                                 | 0.50 | 0.61  | 0.4337 | 0.0240       |
| 27186-05           | MAG14-2A-045Y-2 063-076 | 2     | 5              | 4.75E-16           | 1.400415                                        | 0.034165                                             | 0.1109 | 0.0088                      | 5          | A-E   | 100   | 1.10 | 0.37             | 1.1019 | 0.0072       | 5 | 0.16122  | 0.23954  | 331.4                                           | 4.4                                                  | 1.17 | 0.32  | 1.0888 | 0.0092       |
| 27186-06           | MAG14-2A-045Y-2 063-076 | 2     | 7              | 4.05E-16           | 1.371639                                        | 0.048475                                             | 0.3530 | 0.0120                      | 7          | A-G   | 100   | 1.00 | 0.45             | 0.3433 | 0.0099       | 7 | 0.21929  | 0.10247  | 300.8                                           | 3.9                                                  | 1.09 | 0.36  | 0.3396 | 0.0120       |
| 27186-07           | MAG14-2A-045Y-2 063-076 | 2     | 8              | 2.84E-16           | 7.549726                                        | 0.072655                                             | 1.9430 | 0.0190                      | 6          | C-H   | 89.7  | 1.50 | 0.20             | 1.9721 | 0.0197       | 6 | -0.11305 | 0.77867  | 263                                             | 37.2                                                 | 1.55 | 0.19  | 2.0006 | 0.0340       |
| 27186-08           | MAG14-2A-045Y-2 063-076 | 2     | 8              | 1.69E-16           | 1.365847                                        | 0.121141                                             | 0.3520 | 0.0310                      | 5          | A-F   | 61.1  | 2.10 | 0.08             | 0.2823 | 0.0474       | 5 | 0.34468  | 0.82797  | 285.2                                           | 8.8                                                  | 1.70 | 0.17  | 0.3481 | 0.0560       |
| 27186-09           | MAG14-2A-045Y-2 063-076 | 2     | 6              | 2.68E-16           | 0.89615                                         | 0.078394                                             | 0.2310 | 0.0200                      | 4          | C-F   | 55.7  | 0.50 | 0.71             | 0.3607 | 0.0200       | 4 | -0.70554 | 0.33223  | 273                                             | 30.3                                                 | 0.38 | 0.69  | 0.3878 | 0.0360       |
| 27186-10           | MAG14-2A-045Y-2 063-076 | 2     | 8              | 2.36E-16           | 1.668322                                        | 0.090152                                             | 0.4230 | 0.0230                      | 5          | D-H   | 62.6  | 1.30 | 0.28             | 0.4217 | 0.0294       | 5 | -1.29670 | 0.57137  | 293.8                                           | 19.3                                                 | 1.50 | 0.21  | 0.4463 | 0.0420       |
| 27186-11           | MAG14-2A-045Y-2 063-076 | 2     | 7              | 2.73E-16           | 1.325013                                        | 0.072877                                             | 0.3410 | 0.0310                      | 7          | A-G   | 100   | 0.70 | 0.63             | 0.3412 | 0.0159       | 7 | -0.58857 | 0.91819  | 281.6                                           | 7.8                                                  | 0.72 | 0.61  | 0.3593 | 0.0250       |
| 27186-12           | MAG14-2A-045Y-2 063-076 | 2     | 6              | 1.80E-16           | 1.246647                                        | 0.095555                                             | 0.3210 | 0.0260                      | 6          | A-F   | 100   | 1.00 | 0.41             | 0.3451 | 0.0233       | 6 | -0.12813 | 1.19137  | 291.6                                           | 11.6                                                 | 1.12 | 0.35  | 0.3562 | 0.0280       |
| 27186-13           | MAG14-2A-045Y-2 063-076 | 2     | 8              | 2.17E-16           | 1.145106                                        | 0.092531                                             | 0.2950 | 0.0240                      | 5          | C-G   | 74.9  | 0.50 | 0.74             | 0.3625 | 0.0249       | 5 | 2.70932  | 13.93427 | 285.9                                           | 108.6                                                | 0.65 | 0.58  | 0.3693 | 0.0490       |
| 27186-14           | MAG14-2A-045Y-2 063-076 | 2     | 7              | 2.94E-16           | 1.176864                                        | 0.063866                                             | 0.3030 | 0.0160                      | 7          | A-G   | 100   | 1.00 | 0.46             | 0.3177 | 0.0142       | 7 | 0.28913  | 0.60149  | 280.2                                           | 8.6                                                  | 0.33 | 0.89  | 0.3392 | 0.0180       |
| 27187-01           | MAG14-2A-045Y-2 120-136 | 2     | 6              | 4.99E-16           | 1.414723                                        | 0.036052                                             | 0.3644 | 0.0093                      | 6          | A-F   | 100   | 1.10 | 0.34             | 0.3654 | 0.0083       | 6 | 0.06256  | 1.33469  | 309                                             | 11.8                                                 | 1.38 | 0.32  | 0.3525 | 0.0170       |
| 27187-02           | MAG14-2A-045Y-2 120-136 | 2     | 5              | 1.10E-15           | 1.244932                                        | 0.016899                                             | 0.3207 | 0.0044                      | No plateau |       |       |      |                  |        |              | 4 | 0.07952  | 1.02824  | 293.7                                           | 6.2                                                  | 1.93 | 0.15  | 0.3513 | 0.0078       |
| 27187-03           | MAG14-2A-045Y-2 120-136 | 2     | 5              | 1.42E-15           | 1.31258                                         | 0.01256                                              | 0.3381 | 0.0032                      | 4          | B-E   | 89.8  | 1.70 | 0.17             | 0.3460 | 0.0038       | 4 | 0.04073  | 0.30092  | 309.4                                           | 8.3                                                  | 1.47 | 0.22  | 0.4256 | 0.0089       |
| 27187-04           | MAG14-2A-045Y-2 120-136 | 2     | 6              | 1.21E-15           | 1.5471                                          | 0.018983                                             | 0.3985 | 0.0049                      | 5          | B-F   | 85.1  | 1.80 | 0.13             | 0.4355 | 0.0051       | 5 | -0.03414 | 0.28688  | 291.7                                           | 3.6                                                  | 0.22 | 0.93  | 0.3488 | 0.0061       |
| 27187-05           | MAG14-2A-045Y-2 120-136 | 2     | 6              | 6.71E-16           | 1.319776                                        | 0.026684                                             | 0.3400 | 0.0069                      | 6          | A-F   | 100   | 0.90 | 0.50             | 0.3433 | 0.0055       | 6 | 0.19016  | 0.51896  | 270.3                                           | 14.3                                                 | 1.43 | 0.22  | 0.3645 | 0.0140       |
| 27187-06           | MAG14-2A-045Y-2 120-136 | 2     | 6              | 7.02E-16           | 1.34288                                         | 0.025275                                             | 0.3459 | 0.0065                      | 6          | A-F   | 100   | 2.10 | 0.06             | 0.3409 | 0.0089       | 6 | -0.19016 | 0.51896  | 270.3                                           | 14.3                                                 | 1.43 | 0.22  | 0.3645 | 0.0140       |
| 27187-07           | MAG14-2A-045Y-2 120-136 | 2     | 8              | 4.12E-16           | 1.279445                                        | 0.048657                                             | 0.3300 | 0.0130                      | 8          | A-H   | 100   | 1.10 | 0.37             | 0.3256 | 0.0114       | 8 | -2.37166 | 35.38793 | 274.2                                           | 8.8                                                  | 1.14 | 0.34  | 0.3411 | 0.0190       |
| 27187-08           | MAG14-2A-045Y-2 120-136 | 2     | 6              | 6.22E-16           | 1.739649                                        | 0.030936                                             | 0.4481 | 0.0080                      | 5          | B-F   | 91.8  | 1.50 | 0.21             | 0.4568 | 0.0084       | 5 | -0.56281 | 1.71130  | 291.8                                           | 2.6                                                  | 1.63 | 0.18  | 0.4754 | 0.0250       |
| 27187-09           | MAG14-2A-045Y-2 120-136 | 2     | 6              | 5.48E-16           | 1.316442                                        | 0.035051                                             | 0.3391 | 0.0090                      | 4          | C-F   | 54.2  | 2.20 | 0.08             | 0.3702 | 0.0158       | 4 | -0.99228 | 1.29573  | 252.9                                           | 16.3                                                 | 0.50 | 0.61  | 0.4230 | 0.0210       |
| 27187-10           | MAG14-2A-045Y-2 120-136 | 2     | 5              | 3.42E-16           | 0.79771                                         | 0.076354                                             | 0.2050 | 0.0200                      | No plateau |       |       |      |                  |        |              | 6 | -4.53963 | 34.24376 | 251.4                                           | 44.2                                                 | 0.21 | 0.93  | 0.4001 | 0.0390       |
| 27187-11           | MAG14-2A-045Y-2 120-136 | 2     | 7              | 3.39E-16           | 1.322501                                        | 0.059435                                             | 0.3410 | 0.0150                      | No plateau |       |       |      |                  |        |              | 6 | -4.53963 | 34.24376 | 251.4                                           | 44.2                                                 | 0.21 | 0.93  | 0.4001 | 0.0390       |
| 27187-12           | MAG14-2A-045Y-2 120-136 | 2     | 5              | 1.48E-16           | 0.8929                                          | 0.116595                                             | 0.2300 | 0.0300                      | No plateau |       |       |      |                  |        |              | 4 | 0.38288  | 0.29401  | 294.5                                           | 3.7                                                  | 0.31 | 0.74  | 0.3148 | 0.0350       |
| 27187-13           | MAG14-2A-045Y-2 120-136 | 2     | 5              | 4.04E-16           | 1.116205                                        | 0.046133                                             | 0.2880 | 0.0120                      | No plateau |       |       |      |                  |        |              | 4 | 0.38288  | 0.29401  | 294.5                                           | 3.7                                                  | 0.31 | 0.74  | 0.3148 | 0.0350       |
| 27187-14           | MAG14-2A-045Y-2 120-136 | 2     | 6              | 6.36E-16           | 0.662651                                        | 0.057329                                             | 0.1710 | 0.0150                      | No plateau |       |       |      |                  |        |              | 4 | 0.38288  | 0.29401  | 294.5                                           | 3.7                                                  | 0.31 |       |        |              |



**Table S6.** AF and TH paleomagnetic results. Sample ID#: sample identification; Level: stratigraphic level in meters below surface (mbs); Dec HC/HC: declination of high coercivity component (HC)/ high temperature component (HC) in (°); Inc HC/HC: inclination of HC/HC in (°); Intensity of HC/HC in E<sup>-6</sup> A/m; MAD: Maximum Angular Deviation; Min Step HC/HC: minimum demagnetization step in mT (°) of HC/HC; Max Step HC/HC: maximum demagnetization step in mT and (°) of HC/HC; Dec LC/LC: declination of low coercivity component/ low temperature component (LC/LC) in degrees, this is the component reoriented towards the north; Inc LC/LC: inclination of LC/LC in degrees; Min Step LC; Max Step LC; reoriented Dec HC/HC.

| Sample ID #        | Level  | Dec HCC/HTC | Inc HCC/HTC | Intensity | MAD   | Min Step HCC/HTC | Max Step HCC/HTC | Dec LCC/LTC | Inc LCC/LTC | Min Step LCC/LTC | Max Step LCC/LTC | Reoriented Dec HCC/HTC |
|--------------------|--------|-------------|-------------|-----------|-------|------------------|------------------|-------------|-------------|------------------|------------------|------------------------|
|                    | mbs    | (°)         | (°)         | E-6 A/m   | (°)   | mT (°)           | mT (°)           | (°)         | (°)         | mT (°)           | mT (°)           |                        |
|                    |        |             |             |           |       |                  |                  | lt--> north |             |                  |                  |                        |
| MAG14-2A-03Y-1-42  | 6.92   | 22.57       | 33.71       | 920.69    | 11.79 | 20               | 40               | 41.89       | -19.33      | 5                | 15               | 340.67                 |
| MAG14-2A-03Y-1-65  | 7.15   | 36.22       | 23.39       | 1082.48   | 8.89  | 20               | 40               | 49.31       | -13.09      | 5                | 15               | 346.91                 |
| MAG14-2A-03Y-1-83  | 7.33   | 47.05       | 30.17       | 548.17    | 20.05 | 20               | 35               | 36.28       | 10.78       | 5                | 15               | 10.78                  |
| MAG14-2A-04Y-1-19  | 9.74   | 90.02       | 11.19       | 442.44    | 23.64 | 20               | 35               | 74.61       | 15.41       | 5                | 15               | 15.41                  |
| MAG14-2A-04Y-2-4   | 9.91   | 10.90       | 17.73       | 666.69    | 10.40 | 20               | 40               | 354.01      | -343.10     | 5                | 15               | 16.90                  |
| MAG14-2A-05Y-1-5   | 10.61  | 142.66      | 69.25       | 314.39    | 19.12 | 20               | 35               | 168.00      | -25.34      | 5                | 15               | 334.66                 |
| MAG14-2A-06Y-3-3   | 14.88  | 192.89      | -42.22      | 10656.75  | 3.63  | 20               | 60               | 189.16      | 3.74        | 5                | 15               | 3.74                   |
| MAG14-2A-06Y-1-33  | 12.92  | 41.19       | 44.10       | 366.85    | 12.76 | 20               | 35               | 28.79       | 12.41       | 5                | 15               | 12.41                  |
| MAG14-2A-06Y-1-60  | 13.19  | 336.18      | -13.58      | 1015.71   | 13.69 | 20               | 40               | 319.64      | 16.54       | 5                | 15               | 16.54                  |
| MAG14-2A-06Y-1-70  | 13.29  | 229.85      | -16.79      | 1404.11   | 6.67  | 20               | 40               | 231.55      | -1.70       | 5                | 15               | 358.30                 |
| MAG14-2A-10Y-1-13  | 21.73  | 327.84      | 53.72       | 158.81    | 36.89 | 20               | 40               | 340.61      | -12.76      | 5                | 15               | 347.24                 |
| MAG14-2A-13Y-1-14  | 24.93  | 325.70      | 18.80       | 29256.72  | 15.67 | 20               | 60               | 334.48      | -8.77       | 5                | 15               | 351.23                 |
| MAG14-2A-13Y-1-30  | 25.09  | 343.79      | 17.00       | 5631.42   | 26.53 | 20               | 60               | 304.82      | 38.96       | 5                | 15               | 38.96                  |
| MAG14-2A-13Y-1-48  | 25.27  | 154.01      | 11.83       | 12695.32  | 10.26 | 20               | 60               | 142.35      | 11.66       | 10               | 15               | 11.66                  |
| MAG14-2A-13Y-1-62  | 25.41  | 191.79      | 15.96       | 52916.91  | 10.56 | 20               | 60               | 174.84      | 16.95       | 5                | 15               | 16.95                  |
| MAG14-2A-13Y-1-83  | 25.22  | 18.75       | 1.92        | 225674.31 | 0.39  | 20               | 60               | 13.35       | 5.39        | 5                | 15               | 5.39                   |
| MAG14-2A-14Y-1-55  | 26.99  | 47.18       | 75.19       | 284.78    | 35.99 | 20               | 35               | 18.96       | 28.22       | 5                | 15               | 28.22                  |
| MAG14-2A-17Y-2-5   | 32.74  | 290.75      | -5.88       | 8225.65   | 16.10 | 20               | 40               | 288.97      | 4.78        | 5                | 15               | 1.78                   |
| MAG14-2A-17Y-2-27  | 32.91  | 318.45      | 3.44        | 10015.41  | 17.69 | 20               | 40               | 304.99      | 13.46       | 5                | 15               | 13.46                  |
| MAG14-2A-17Y-2-48  | 33.08  | 307.22      | 13.01       | 10717.26  | 14.73 | 20               | 50               | 310.18      | -2.97       | 5                | 15               | 357.03                 |
| MAG14-2A-17Y-2-69  | 33.24  | 291.68      | 13.96       | 10877.02  | 8.40  | 20               | 50               | 297.54      | -5.86       | 5                | 15               | 354.14                 |
| MAG14-2A-17Y-2-92  | 33.42  | 234.99      | 8.49        | 7911.33   | 7.30  | 20               | 50               | 228.29      | 6.70        | 5                | 15               | 6.70                   |
| MAG14-2A-17Y-2-109 | 33.55  | 325.32      | 10.25       | 10786.99  | 6.50  | 20               | 60               | 325.76      | -0.44       | 5                | 15               | 359.56                 |
| MAG14-2A-17Y-2-131 | 33.72  | 84.25       | 12.08       | 9881.16   | 8.27  | 20               | 50               | 85.80       | -1.54       | 5                | 15               | 358.46                 |
| MAG14-2A-17Y-2-147 | 33.84  | 258.56      | 16.43       | 12143.77  | 6.00  | 20               | 50               | 260.80      | -2.23       | 5                | 15               | 357.77                 |
| MAG14-2A-18Y-1-21  | 34.14  | 41.61       | -20.80      | 10037.56  | 11.09 | 20               | 60               | 29.88       | 11.73       | 5                | 15               | 11.73                  |
| MAG14-2A-18Y-1-30  | 34.23  | 39.36       | 6.11        | 9048.46   | 13.25 | 20               | 60               | 27.54       | 11.82       | 5                | 15               | 11.82                  |
| MAG14-2A-18Y-2-13  | 34.45  | 33.31       | 8.85        | 10181.51  | 4.67  | 20               | 50               | 29.65       | 3.66        | 5                | 15               | 3.66                   |
| MAG14-2A-18Y-2-33  | 34.65  | 42.74       | 28.77       | 10585.13  | 7.47  | 20               | 60               | 36.91       | 5.84        | 5                | 15               | 5.84                   |
| MAG14-2A-18Y-2-47  | 34.79  | 71.71       | 7.97        | 938.29    | 6.55  | 20               | 60               | 66.99       | 4.72        | 5                | 15               | 4.72                   |
| MAG14-2A-18Y-2-64  | 34.96  | 163.07      | 32.19       | 5721.76   | 2.92  | 20               | 60               | 163.99      | -0.92       | 5                | 15               | 359.08                 |
| MAG14-2A-18Y-2-82  | 35.14  | 207.77      | 14.97       | 9786.88   | 3.09  | 20               | 60               | 216.20      | -8.44       | 5                | 15               | 351.56                 |
| MAG14-2A-18Y-2-106 | 35.38  | 72.84       | 12.73       | 6055.77   | 9.83  | 20               | 60               | 63.83       | 9.01        | 5                | 15               | 9.01                   |
| MAG14-2A-18Y-2-131 | 35.63  | 225.33      | 10.28       | 15098.51  | 1.84  | 20               | 60               | 227.17      | -1.84       | 5                | 15               | 358.16                 |
| MAG14-2A-19Y-1-3   | 37.01  | 45.32       | 38.94       | 127.18    | 39.59 | 20               | 40               | 339.75      | -294.43     | 5                | 15               | 65.57                  |
| MAG14-2A-19Y-2-54  | 37.72  | 82.89       | -70.33      | 66.71     | 33.30 | 20               | 35               | 73.00       | 9.89        | 5                | 15               | 9.89                   |
| MAG14-2A-23Y-1-5   | 46.17  | 151.30      | 1.60        | 201.79    | 30.80 | 20               | 35               | 194.35      | -43.06      | 5                | 15               | 316.94                 |
| MAG14-2A-23Y-2-136 | 48.80  | 289.73      | 2.36        | 63.13     | 29.43 | 20               | 35               | 293.77      | -4.03       | 5                | 15               | 355.97                 |
| MAG14-2A-29Y-1-67  | 62.03  | 351.36      | -2.78       | 216.39    | 21.18 | 20               | 40               | 343.99      | 7.38        | 5                | 15               | 7.38                   |
| MAG14-2A-29Y-1-87  | 62.23  | 351.43      | -29.73      | 129.37    | 16.20 | 20               | 35               | 302.58      | 48.84       | 5                | 15               | 48.84                  |
| MAG14-2A-29Y-1-118 | 62.54  | 30.38       | -11.24      | 144.64    | 42.76 | 20               | 35               | 358.09      | -327.71     | 5                | 15               | 32.29                  |
| MAG14-2A-29Y-1-125 | 62.61  | 300.28      | -27.56      | 82.44     | 30.37 | 20               | 35               | 3.33        | 296.95      | 5                | 15               | 296.95                 |
| MAG14-2A-29Y-2-93  | 63.67  | 306.80      | -18.74      | 148.70    | 25.30 | 20               | 40               | 316.55      | -9.74       | 5                | 15               | 350.26                 |
| MAG14-2A-29Y-2-143 | 64.17  | 3.27        | 67.24       | 25.99     | 19.85 | 20               | 35               | 273.16      | -269.90     | 5                | 15               | 90.10                  |
| MAG14-2A-30Y-1-42  | 64.83  | 188.25      | 10.61       | 194.69    | 25.82 | 20               | 40               | 239.06      | -50.81      | 5                | 15               | 309.19                 |
| MAG14-2A-33Y-2-142 | 75.86  | 143.63      | -3.85       | 1713.35   | 9.25  | 20               | 40               | 151.60      | -7.97       | 5                | 15               | 352.03                 |
| MAG14-2A-33Y-3-7   | 76.05  | 149.04      | -37.78      | 5972.10   | 6.02  | 20               | 50               | 220.47      | -71.43      | 5                | 15               | 288.57                 |
| MAG14-2A-35Y-1-31  | #N/A   | 214.17      | 7.44        | 263.90    | 25.22 | 20               | 40               | 233.29      | -19.12      | 5                | 15               | 340.88                 |
| MAG14-2A-35Y-1-60  | #N/A   | 318.91      | -28.44      | 114.44    | 25.57 | 20               | 40               | 329.79      | -10.87      | 5                | 15               | 349.13                 |
| MAG14-2A-39Y-1-24  | 83.04  | 27.00       | -10.81      | 110.64    | 35.29 | 20               | 35               | 205.05      | -178.04     | 5                | 15               | 181.96                 |
| MAG14-2A-39Y-1-39  | 83.19  | 127.88      | -9.02       | 242.42    | 17.01 | 20               | 40               | 104.61      | 23.26       | 5                | 15               | 23.26                  |
| MAG14-2A-39Y-1-54  | 83.34  | 359.01      | -26.43      | 170.48    | 37.38 | 20               | 40               | 350.32      | 8.69        | 5                | 15               | 8.69                   |
| MAG14-2A-39Y-1-73  | 83.53  | 355.52      | -17.41      | 142.38    | 19.65 | 20               | 35               | 325.88      | 29.63       | 5                | 15               | 29.63                  |
| MAG14-2A-39Y-1-129 | 84.09  | 322.19      | 5.13        | 339.77    | 23.60 | 20               | 35               | 20.97       | 301.22      | 5                | 15               | 301.22                 |
| MAG14-2A-40Y-1-35  | 86.10  | 187.49      | -6.52       | 235.13    | 8.03  | 20               | 40               | 181.62      | 5.88        | 5                | 15               | 5.88                   |
| MAG14-2A-40Y-1-58  | 86.33  | 48.41       | -6.02       | 332.29    | 13.56 | 20               | 40               | 53.32       | -4.91       | 5                | 15               | 355.09                 |
| MAG14-2A-40Y-1-72  | 86.47  | 260.74      | -24.33      | 618.63    | 9.26  | 20               | 40               | 260.49      | 0.26        | 5                | 15               | 0.26                   |
| MAG14-2A-40Y-1-89  | 86.64  | 260.30      | -24.81      | 201.37    | 29.15 | 20               | 40               | 253.91      | 6.38        | 5                | 15               | 6.38                   |
| MAG14-2A-40Y-1-106 | 86.81  | 109.76      | 10.63       | 267.28    | 15.40 | 20               | 40               | 102.00      | 7.76        | 5                | 15               | 7.76                   |
| MAG14-2A-45Y-1-62  | 95.12  | 152.80      | 7.14        | 159.22    | 27.10 | 20               | 40               | 192.88      | -40.08      | 5                | 15               | 319.92                 |
| MAG14-2A-45Y-1-83  | 95.32  | 164.29      | -24.05      | 296.14    | 8.37  | 20               | 50               | 166.03      | -1.74       | 5                | 15               | 358.26                 |
| MAG14-2A-45Y-1-136 | 95.84  | 316.68      | -12.95      | 705.51    | 9.34  | 20               | 40               | 322.88      | -6.20       | 5                | 15               | 353.80                 |
| MAG14-2A-45Y-2-24  | 96.23  | 258.17      | -14.22      | 1927.80   | 3.43  | 20               | 70               | 261.31      | -3.14       | 5                | 15               | 356.86                 |
| MAG14-2A-45Y-2-46  | 96.45  | 61.65       | -18.55      | 1986.94   | 3.78  | 20               | 50               | 63.33       | -1.67       | 5                | 15               | 358.33                 |
| MAG14-2A-45Y-2-91  | 96.89  | 58.10       | -3.42       | 1399.42   | 13.57 | 20               | 40               | 55.26       | 2.83        | 5                | 15               | 2.83                   |
| MAG14-2A-45Y-2-146 | 97.42  | 42.52       | -16.88      | 1750.07   | 8.16  | 20               | 50               | 34.31       | 8.21        | 5                | 15               | 8.21                   |
| MAG14-2A-46Y-1-7   | 97.64  | 156.24      | -19.64      | 2246.56   | 6.53  | 20               | 50               | 147.31      | 8.93        | 5                | 15               | 8.93                   |
| MAG14-2A-46Y-1-121 | 98.75  | 157.39      | -15.87      | 1213.03   | 9.91  | 20               | 50               | 149.94      | 7.45        | 5                | 15               | 7.45                   |
| MAG14-2A-46Y-2-18  | 99.21  | 180.52      | -7.62       | 1241.68   | 5.49  | 20               | 50               | 184.20      | -3.68       | 5                | 15               | 356.32                 |
| MAG14-2A-46Y-2-90  | 99.92  | 133.19      | 21.98       | 1261.79   | 10.69 | 20               | 40               | 231.00      | -97.80      | 5                | 15               | 262.20                 |
| MAG14-2A-46Y-2-105 | 100.06 | 232.23      | 21.55       | 2026.17   | 7.13  | 20               | 80               | 357.01      | -124.78     | 5                | 15               | 235.22                 |
| MAG14-2A-46Y-2-138 | 100.38 | 45.24       | 6.22        | 354.65    | 22.85 | 20               | 40               | 46.21       | -0.97       | 5                | 15               | 359.03                 |
| MAG14-2A-48Y-2-13  | 102.99 | 0.34        | -28.54      | 93.15     | 39.94 | 20               | 40               | 349.21      | -348.87     | 5                | 15               | 11.13                  |
| MAG14-2A-49Y-1-16  | 104.19 | 20.07       | -50.63      | 76.47     | 39.03 | 20               | 35               | 310.36      | -290.29     | 5                | 15               | 69.71                  |
| MAG14-2A-52Y-1-8   | 110.21 | 335.34      | -4.67       | 109.62    | 18.45 | 20               | 40               | 351.37      | -16.04      | 5                | 15               | 343.96                 |
| MAG14-2A-52Y-1-24  | 110.37 | 259.64      | 35.01       | 74.05     | 39.67 | 20               | 40               | 3.35        | 256.29      | 5                | 15               | 256.29                 |
| MAG14-2A-52Y-1-47  | 110.60 | 344.07      | -30.78      | 182.38    | 24.77 | 20               | 35               | 333.86      | 10.21       | 5                | 15               | 10.21                  |
| MAG14-2A-55Y-1-43  | 116.66 | 236.67      | -8.10       | 176.59    | 11.99 | 20               | 40               | 289.41      | -52.74      | 5                | 15               | 307.26                 |
| MAG14-2A-55Y-1-70  | 116.93 | 180.45      | 3.88        | 98.39     | 33.50 | 20               | 35               | 129.05      | 51.39       | 5                | 15               | 51.39                  |
| MAG14-2A-55Y-1-90  | 117.13 | 304.07      | -0.54       | 1410.01   | 12.99 | 20               | 50               | 304.87      | -0.80       | 5                | 15               | 359.20                 |
| MAG14-2A-55Y-1-108 | 117.31 | 268.28      | -1.53       | 1578.15   | 8.32  | 20               | 60               | 274.25      | -5.97       | 5                | 15               | 354.03                 |
| MAG14-2A-55Y-1-135 | 117.58 | 203.48      | -4.05       | 131.75    | 24.63 | 20               | 40               | 210.49      | -7.02       | 5                | 15               | 352.98                 |
| MAG14-2A-56Y-1-6   | 118.42 | 325.96      | 52.09       | 75.07     | 30.26 | 20               | 40               | 276.17      | 49.79       | 5                | 15               | 49.79                  |
| MAG14-2A-56Y-1-51  | 118.87 | 278.27      | 2.89        | 139.72    | 20.92 | 20               | 40               | 294.07      | -15.80      | 5                | 15               | 344.20                 |
| MAG14-2A-56Y-1-84  | 119.20 | 220.10      | -4.55       | 71.17     | 19.72 | 20               | 40               | 238.37      | -18.27      | 5                | 15               | 341.73                 |
| MAG14-2A-56Y-1-105 | 119.41 | 142.70      | -23.12      | 119.07    | 29.95 | 20               | 40               | 193.55      | -50.85      | 5                | 15               | 309.15                 |
| MAG14-2A-56Y-1-133 | 119.69 | 51.63       | 13.08       | 6062.02   | 27.07 | 20               | 40               | 40.76       | 10.87       | 5                | 15               | 10.87                  |
| MAG14-2A-56Y-1-145 | 119.81 | 351.26      | -19.46      | 750.70    | 19.17 | 2                |                  |             |             |                  |                  |                        |

|                     |        |        |        |          |       |     |     |        |         |     |     |        |
|---------------------|--------|--------|--------|----------|-------|-----|-----|--------|---------|-----|-----|--------|
| MAG14-2A-57Y-2-129  | 122.12 | 328.27 | -11.42 | 370.09   | 19.41 | 20  | 50  | 343.13 | -14.85  | 5   | 15  | 345.15 |
| MAG14-2A-58Y-2-42   | 123.25 | 180.64 | -7.25  | 621.70   | 12.57 | 20  | 50  | 207.00 | -26.35  | 5   | 15  | 333.65 |
| MAG14-2A-58Y-2-64   | 123.47 | 19.19  | 35.58  | 229.31   | 34.74 | 20  | 35  | 28.06  | -8.87   | 5   | 15  | 351.13 |
| MAG14-2A-58Y-2-96   | 123.79 | 86.83  | -22.65 | 232.93   | 15.42 | 20  | 40  | 103.77 | -16.94  | 5   | 15  | 343.06 |
| MAG14-2A-58Y-2-129  | 124.12 | 341.60 | 1.32   | 1332.43  | 11.10 | 20  | 40  | 333.13 | 8.47    | 5   | 15  | 8.47   |
| MAG14-2A-59Y-2-39   | 125.86 | 359.88 | 1.87   | 1152.36  | 22.64 | 20  | 50  | 359.47 | 0.40    | 5   | 15  | 0.40   |
| MAG14-2A-59Y-2-64   | 126.10 | 336.34 | -28.52 | 423.44   | 24.36 | 20  | 40  | 357.44 | -21.10  | 5   | 15  | 338.90 |
| MAG14-2A-59Y-2-79   | 126.25 | 358.24 | -15.85 | 669.33   | 25.39 | 20  | 60  | 355.22 | 3.02    | 5   | 15  | 3.02   |
| MAG14-2A-59Y-2-107  | 126.52 | 53.01  | 34.21  | 174.71   | 28.54 | 20  | 40  | 350.03 | -297.01 | 5   | 15  | 62.99  |
| MAG14-2A-59Y-2-135  | 126.78 | 58.03  | -21.06 | 358.22   | 28.39 | 20  | 40  | 42.78  | 15.24   | 5   | 15  | 15.24  |
| MAG14-2A-59Y-3-11   | 126.99 | 274.92 | 12.89  | 55.34    | 22.16 | 20  | 35  | 110.36 | 164.57  | 5   | 15  | 164.57 |
| MAG14-2A-59Y-3-27   | 127.14 | 24.21  | -1.71  | 645.99   | 10.22 | 20  | 40  | 21.34  | 2.86    | 5   | 15  | 2.86   |
| MAG14-2A-59Y-3-46   | 127.33 | 16.10  | -8.91  | 251.09   | 15.14 | 20  | 40  | 8.68   | 7.41    | 5   | 15  | 7.41   |
| MAG14-2A-59Y-3-78   | 127.63 | 296.25 | -29.73 | 103.25   | 21.25 | 20  | 40  | 351.72 | -55.47  | 5   | 15  | 304.53 |
| MAG14-2A-59Y-3-94   | 127.79 | 355.04 | -5.84  | 31.84    | 24.71 | 20  | 40  | 296.32 | 58.72   | 5   | 15  | 58.72  |
| MAG14-2A-59Y-3-139  | 128.22 | 327.79 | -9.33  | 113.08   | 23.58 | 20  | 35  | 320.63 | 7.16    | 5   | 15  | 7.16   |
| MAG14-2A-60Y-1-21   | 128.63 | 204.20 | 1.31   | 75.85    | 11.78 | 20  | 40  | 197.11 | 7.09    | 5   | 15  | 7.09   |
| MAG14-2A-60Y-1-43   | 128.85 | 253.91 | -5.47  | 116.69   | 24.36 | 20  | 35  | 251.55 | 2.36    | 5   | 15  | 2.36   |
| MAG14-2A-60Y-1-67   | 129.09 | 307.62 | -37.95 | 135.29   | 35.52 | 20  | 40  | 305.04 | 2.58    | 5   | 15  | 2.58   |
| MAG14-2A-60Y-1-100  | 129.42 | 52.07  | 8.71   | 182.98   | 20.55 | 20  | 40  | 34.90  | 17.17   | 5   | 15  | 17.17  |
| MAG14-2A-60Y-2-12   | 129.63 | 354.94 | -1.35  | 202.70   | 26.37 | 20  | 40  | 8.00   | 346.94  | 5   | 15  | 346.94 |
| MAG14-2A-60Y-2-57   | 130.08 | 74.44  | 24.54  | 109.57   | 38.43 | 20  | 40  | 61.70  | 12.74   | 5   | 15  | 12.74  |
| MAG14-2A-60Y-2-45   | 129.96 | 181.00 | 22.48  | 133.12   | 36.82 | 20  | 50  | 127.43 | 53.57   | 5   | 15  | 53.57  |
| MAG14-2A-60Y-2-71   | 130.22 | 273.72 | 1.20   | 16.55    | 24.78 | 20  | 40  | 27.64  | 246.08  | 5   | 15  | 246.08 |
| MAG14-2A-61Y-1-24   | 131.71 | 94.46  | 12.56  | 82.32    | 27.82 | 20  | 40  | 87.49  | 6.97    | 5   | 15  | 6.97   |
| MAG14-2A-61Y-1-40   | 131.87 | 331.24 | -27.34 | 37.65    | 22.93 | 20  | 40  | 354.13 | -22.88  | 5   | 15  | 337.12 |
| MAG14-2A-61Y-1-54   | 132.01 | 288.84 | -31.38 | 69.58    | 31.56 | 20  | 40  | 192.98 | 95.86   | 5   | 15  | 95.86  |
| MAG14-2A-61Y-1-73   | 132.19 | 154.20 | -35.39 | 280.82   | 11.32 | 20  | 40  | 143.71 | 10.49   | 5   | 15  | 10.49  |
| MAG14-2A-61Y-1-99   | 132.45 | 150.37 | -15.35 | 99.53    | 15.14 | 20  | 50  | 152.25 | -1.88   | 5   | 15  | 358.12 |
| MAG14-2A-61Y-2-4    | 132.65 | 186.88 | -18.36 | 185.86   | 12.61 | 20  | 50  | 196.03 | -9.15   | 5   | 15  | 350.85 |
| MAG14-2A-61Y-2-24   | 132.85 | 127.22 | -9.11  | 128.23   | 19.55 | 20  | 40  | 94.93  | 32.30   | 5   | 15  | 32.30  |
| MAG14-2A-61Y-2-52   | 133.13 | 16.18  | -7.18  | 238.22   | 33.03 | 20  | 40  | 41.15  | -24.97  | 5   | 15  | 335.03 |
| MAG14-2A-61Y-2-72   | 133.33 | 328.04 | -4.89  | 500.33   | 5.82  | 20  | 50  | 328.44 | -0.40   | 5   | 15  | 359.60 |
| MAG14-2A-61Y-2-86   | 133.46 | 132.92 | -17.78 | 227.90   | 6.32  | 20  | 50  | 132.83 | 0.09    | 5   | 15  | 0.09   |
| MAG14-2A-61Y-2-103  | 133.63 | 139.82 | -12.96 | 558.55   | 2.68  | 20  | 80  | 132.51 | 7.30    | 5   | 15  | 7.30   |
| MAG14-2A-61Y-2-128  | 133.88 | 4.92   | -2.11  | 378.98   | 11.58 | 20  | 50  | 7.70   | -2.79   | 5   | 15  | 357.21 |
| MAG14-2A-61Y-3-14   | 134.20 | 172.92 | -19.96 | 144.81   | 30.25 | 20  | 50  | 171.75 | 1.17    | 5   | 15  | 1.17   |
| MAG14-2A-62Y-1-25   | 134.76 | 139.34 | 24.61  | 306.32   | 15.85 | 20  | 50  | 134.17 | 5.16    | 5   | 15  | 5.16   |
| MAG14-2A-62Y-1-33   | 134.84 | 80.48  | 7.81   | 104.17   | 27.62 | 20  | 35  | 68.96  | 11.51   | 5   | 15  | 11.51  |
| MAG14-2A-62Y-2-32   | 135.39 | 219.32 | 9.96   | 289.14   | 8.93  | 20  | 50  | 219.24 | 0.08    | 5   | 15  | 0.08   |
| MAG14-2A-62Y-2-63   | 135.70 | 344.75 | 13.66  | 147.98   | 25.98 | 20  | 40  | 57.25  | 287.50  | 5   | 15  | 287.50 |
| MAG14-2A-62Y-2-78   | 135.85 | 163.82 | -22.29 | 189.96   | 17.78 | 20  | 40  | 176.28 | -12.46  | 5   | 15  | 347.54 |
| MAG14-2A-64Y-1-12   | 140.73 | 145.19 | -8.20  | 9053.51  | 6.99  | 20  | 50  | 141.91 | 3.28    | 5   | 15  | 3.28   |
| MAG14-2A-64Y-1-29   | 140.90 | 205.68 | 8.22   | 7977.87  | 15.92 | 20  | 35  | 152.87 | 52.81   | 5   | 15  | 52.81  |
| MAG14-2A-64Y-1-72   | 141.33 | 259.06 | 1.31   | 6006.85  | 24.86 | 20  | 40  | 294.95 | -35.89  | 5   | 15  | 324.11 |
| MAG14-2A-64Y-2-5    | 141.48 | 303.73 | 4.99   | 30793.37 | 10.13 | 20  | 35  | 312.70 | -8.97   | 5   | 15  | 351.03 |
| MAG14-2A-64Y-2-41   | 141.84 | 13.20  | -24.00 | 147.61   | 10.94 | 20  | 50  | 354.56 | -341.36 | 5   | 15  | 18.64  |
| MAG14-2A-64Y-2-100  | 142.43 | 75.88  | -37.37 | 123.55   | 39.77 | 20  | 35  | 111.83 | -35.95  | 5   | 15  | 324.05 |
| MAG14-2A-65Y-1-45   | 144.05 | 58.08  | 27.58  | 2920.36  | 28.13 | 20  | 35  | 53.73  | 4.35    | 5   | 15  | 4.35   |
| MAG14-2A-65Y-1-68   | 144.25 | 298.60 | -35.08 | 4210.01  | 22.91 | 20  | 30  | 80.38  | 218.21  | 5   | 15  | 218.21 |
| MAG14-2A-65Y-2-12   | 144.40 | 38.24  | 1.85   | 5237.86  | 27.07 | 20  | 35  | 41.01  | -2.77   | 5   | 15  | 357.23 |
| MAG14-2A-65Y-2-30   | 144.56 | 120.33 | -34.68 | 982.33   | 23.21 | 20  | 30  | 241.77 | -121.44 | 5   | 15  | 238.56 |
| MAG14-2A-65Y-2-89   | 145.07 | 75.83  | 23.22  | 35341.59 | 23.90 | 20  | 35  | 87.26  | -11.43  | 5   | 15  | 348.57 |
| MAG14-2A-66Y-1-29   | 145.45 | 274.73 | -23.57 | 23913.79 | 4.94  | 20  | 35  | 261.88 | 12.84   | 5   | 15  | 12.84  |
| MAG14-2A-66Y-1-55   | 145.71 | 42.00  | -7.96  | 22485.47 | 24.40 | 20  | 35  | 10.25  | 31.76   | 5   | 15  | 31.76  |
| MAG14-2A-66Y-1-75   | 145.91 | 347.46 | 7.20   | 5322.96  | 30.26 | 20  | 40  | 345.39 | 2.08    | 5   | 15  | 2.08   |
| MAG14-2A-66Y-1-92   | 146.08 | 356.30 | 41.01  | 18045.63 | 36.32 | 20  | 40  | 124.40 | 231.90  | 5   | 15  | 231.90 |
| MAG14-2A-67Y-2-6    | 148.09 | 314.54 | -8.44  | 563.23   | 11.53 | 20  | 50  | 332.82 | -18.27  | 5   | 15  | 341.73 |
| MAG14-2A-67Y-2-32   | 148.35 | 352.84 | -36.62 | 469.12   | 13.60 | 20  | 40  | 357.50 | -4.67   | 5   | 15  | 355.33 |
| MAG14-2A-67Y-2-57   | 148.60 | 154.78 | -11.10 | 208.73   | 19.89 | 20  | 40  | 152.05 | 2.73    | 5   | 15  | 2.73   |
| MAG14-2A-67Y-2-70   | 148.73 | 123.23 | 2.14   | 223.23   | 12.40 | 20  | 40  | 155.16 | -31.93  | 5   | 15  | 328.07 |
| MAG14-2A-67Y-2-88   | 148.91 | 293.26 | 4.72   | 160.99   | 15.58 | 20  | 35  | 306.38 | -13.12  | 5   | 15  | 346.88 |
| MAG14-2A-67Y-2-105  | 149.08 | 299.49 | -43.62 | 267.45   | 24.54 | 20  | 40  | 302.26 | -2.77   | 5   | 15  | 357.23 |
| MAG14-2A-67Y-2-120  | 149.23 | 295.77 | -17.20 | 327.84   | 22.80 | 20  | 40  | 303.36 | -7.60   | 5   | 15  | 352.40 |
| MAG14-2A-67Y-2-135  | 149.38 | 243.02 | 4.33   | 812.45   | 10.66 | 20  | 40  | 215.33 | 27.69   | 5   | 15  | 27.69  |
| MAG14-2A-67Y-3-2    | 149.55 | 357.21 | 20.09  | 161.37   | 23.57 | 20  | 40  | 33.05  | 324.16  | 5   | 15  | 324.16 |
| MAG14-2A-68Y-1-13   | 149.87 | 119.04 | 9.10   | 109.44   | 40.15 | 20  | 40  | 221.32 | -102.28 | 5   | 15  | 257.72 |
| MAG14-2A-68Y-1-28   | 150.02 | 3.64   | 11.56  | 385.11   | 17.50 | 20  | 40  | 6.48   | -2.84   | 5   | 15  | 357.16 |
| MAG14-2A-68Y-1-57   | 150.29 | 2.00   | 2.88   | 960.71   | 13.54 | 20  | 40  | 13.48  | -11.48  | 5   | 15  | 348.52 |
| MAG14-2A-68Y-2-2    | 150.36 | 286.46 | 23.31  | 552.86   | 19.51 | 20  | 40  | 271.36 | 15.10   | 5   | 15  | 15.10  |
| MAG14-2A-68Y-2-27   | 150.60 | 265.15 | -11.21 | 779.74   | 12.85 | 20  | 40  | 265.13 | 0.02    | 5   | 15  | 0.02   |
| MAG14-2A-68Y-2-45   | 150.77 | 322.15 | -12.86 | 171.45   | 22.14 | 20  | 50  | 319.97 | 2.18    | 5   | 15  | 2.18   |
| MAG14-2A-68Y-2-70   | 151.01 | 311.72 | -1.35  | 285.02   | 13.67 | 20  | 50  | 288.25 | 23.47   | 5   | 15  | 23.47  |
| MAG14-2A-68Y-2-84   | 151.14 | 320.26 | -12.93 | 78.56    | 41.39 | 20  | 40  | 289.81 | 30.44   | 5   | 15  | 30.44  |
| MAG14-2A-69Y-1-48   | 151.88 | 200.57 | -10.84 | 1067.62  | 17.78 | 20  | 40  | 205.30 | -4.73   | 5   | 15  | 355.27 |
| MAG14-2A-69Y-1-22   | 151.65 | 93.41  | -13.71 | 1138.80  | 14.67 | 20  | 40  | 141.59 | -48.19  | 5   | 15  | 311.81 |
| MAG14-2A-70Y-2-3    | 152.08 | 26.92  | -7.44  | 998.77   | 10.55 | 20  | 50  | 6.68   | 20.24   | 5   | 15  | 20.24  |
| MAG14-2A-71Y-1-20   | 152.21 | 249.57 | 9.20   | 2218.75  | 29.79 | 20  | 40  | 171.69 | 77.88   | 5   | 15  | 77.88  |
| MAG14-2A-78Q-1-93   | 161.68 | 314.56 | -9.01  | 8074.41  | 30.44 | 20  | 35  | 341.34 | -26.78  | 5   | 15  | 333.22 |
| MAG14-2A-79Q-2-3    | 162.59 | 342.41 | -80.43 | 613.40   | 29.26 | 20  | 40  | 281.06 | 61.35   | 5   | 15  | 61.35  |
| MAG14-2A-81Q-2-76   | 166.48 | 50.61  | -16.89 | 367.23   | 35.36 | 20  | 30  | 55.91  | -5.29   | 5   | 15  | 354.71 |
| MAG14-2A-81Q-2-85   | 166.57 | 38.09  | -4.89  | 663.74   | 20.13 | 20  | 50  | 36.40  | 1.69    | 5   | 15  | 1.69   |
| MAG14-2A-84Q-1-6    | 171.15 | 233.59 | 13.02  | 838.23   | 13.53 | 20  | 50  | 204.25 | 29.35   | 5   | 15  | 29.35  |
| MAG14-2A-84Q-1-18   | 171.27 | 130.74 | -4.78  | 1196.52  | 11.26 | 20  | 50  | 121.34 | 9.41    | 5   | 15  | 9.41   |
| MAG14-2A-85Q-1-13   | 174.27 | 204.16 | -7.92  | 215.84   | 32.79 | 20  | 40  | 220.09 | -15.93  | 5   | 15  | 344.07 |
| MAG14-2A-85Q-1-22   | 174.36 | 152.17 | -11.47 | 336.13   | 14.30 | 20  | 35  | 276.92 | -124.76 | 5   | 15  | 235.24 |
| MAG14-2A-85Q-1-79   | 174.92 | 326.87 | -37.83 | 794.25   | 10.84 | 250 | 400 | 75.54  | -37.83  | 75  | 200 | 75.54  |
| MAG14-2A-87Q-1-13   | 177.31 | 358.18 | 38.47  | 128.88   | 27.95 | 200 | 500 | 19.76  | 38.47   | 100 | 300 | 19.76  |
| MAG14-2A-90Q-1-3    | 183.31 | 33.74  | -5.28  | 184.13   | 14.35 | 150 | 300 | 172.38 | -5.28   | 20  | 100 | 172.38 |
| MAG14-2A-91Q-1-3.5  | 184.61 | 123.12 | 24.46  | 72.63    | 30.30 | 250 | 400 | 213.60 | 24.46   | 20  | 100 | 213.60 |
| MAG14-2A-91Q-1-3.5  | 184.61 | 136.13 | -38.38 | 94.61    | 23.08 | 150 | 300 | 226.61 | -38.38  | 20  | 100 | 226.61 |
| MAG14-2A-93Q-1-36.5 | 186.69 | 289    |        |          |       |     |     |        |         |     |     |        |

**Table S7.** Great Circle (GC) palaeomagnetic results. Sample ID#: sample identification; Level: stratigraphic level in metres below surface (mbs); Dec GC: declination of GC in degrees; Inc GC: inclination of GC in degrees; Intensity: intensity of calculated GC in E<sup>-6</sup> A/m; MAD: Maximum Angular Deviation; Min Step GC: minimum step of GC in mT and (°); Max Step GC: maximum step of GC in mT and (°).

| Sample ID #         | level<br>mbs | Dec GC<br>(°) | Inc GC<br>(°) | Intensity<br>E-6 A/m | MAD<br>(°)  | Min Step GC<br>mT (°) | Max Step GC<br>mT (°) |
|---------------------|--------------|---------------|---------------|----------------------|-------------|-----------------------|-----------------------|
| MAG14-2A-17Y-1-19   | 32.51        | 67.35         | -32.39        | 9192.21              | 21.62       | 5                     | 30                    |
| MAG14-2A-17Y-1-32   | 32.61        | 58.54         | -56.65        | 6538.88              | 1.20194E-06 | 5                     | 25                    |
| MAG14-2A-96Q-1-13.5 | 188.91       | 325.42        | -44.58        | 1391.74              | 6.71        | 20                    | 100                   |
| MAG14-2A-101Q-1-13  | 192.36       | 28.50         | -46.28        | 4806.21              | 12.56       | 75                    | 200                   |
| MAG14-2A-98Q-1-14   | 189.60       | 127.44        | -3.90         | 1686.64              | 9.54        | 75                    | 250                   |
| MAG14-2A-90Q-1-3    | 183.31       | 109.47        | -43.29        | 332.18               | 14.71       | 20                    | 100                   |
| MAG14-2A-102Q-1-54  | 193.49       | 265.97        | -12.06        | 1168.39              | 2.56        | 150                   | 300                   |

**Table S8 Geochemical analyses**

| MBS depth | CaO  | Na2O  | LOI   | MBS depth | CaO  | Na2O  | LOI   | MBS depth | CaO   | Na2O  | LOI   | MBS depth | CaO   | Na2O  | LOI   |
|-----------|------|-------|-------|-----------|------|-------|-------|-----------|-------|-------|-------|-----------|-------|-------|-------|
| 3.1925    | 0.08 | 38.13 | 58.27 | 55.9993   | 0.04 | 30.54 | 48.51 | 99.4943   | 1.3   | 9.04  | 6.19  | 142.216   | 0.76  | 4.43  | 11.21 |
| 5.44      | 4.79 | 30.12 | 41.41 | 56.3172   | 0.05 | 35.42 | 54.72 | 99.8061   | 1.1   | 7.48  | 5.41  | 142.536   | 1.07  | 4.17  | 11.89 |
| 5.75      | 0.08 | 39.19 | 58.95 | 56.6351   | 0.09 | 36.92 | 56.14 | 100.1179  | 1.11  | 6.98  | 5.17  | 142.856   | 3.27  | 4.11  | 12.91 |
| 6.52      | 0.09 | 39.35 | 59.01 | 56.9519   | 0.72 | 37.42 | 57.51 | 100.4297  | 1.21  | 7.46  | 5.55  | 143.6761  | 6.13  | 7.19  | 20.37 |
| 6.83      | 0.2  | 36.91 | 57.85 | 57.2698   | 0.19 | 33.38 | 53.52 | 100.75    | 1.05  | 7.77  | 4.85  | 143.9457  | 1.66  | 4.7   | 11.78 |
| 7.2       | 0.43 | 39.4  | 56.11 | 57.5877   | 0.07 | 37.09 | 60.24 | 102.6151  | 2.77  | 9.91  | 19.39 | 144.2239  | 4.34  | 3.88  | 18.06 |
| 7.436     | 0.4  | 33.21 | 44.39 | 57.9056   | 0.05 | 38.5  | 57.89 | 102.8559  | 2.49  | 6.89  | 18.23 | 144.493   | 3.55  | 4.64  | 19.21 |
| 9.56      | 0.09 | 39.47 | 57.32 | 58.2036   | 0.05 | 36.86 | 60.64 | 103.0899  | 4.62  | 4.86  | 20.94 | 144.7726  | 7.8   | 5.39  | 16.5  |
| 9.88      | 0.1  | 34.59 | 57.66 | 58.54     | 0.06 | 38.02 | 59.33 | 103.3307  | 3.1   | 5.38  | 20.01 | 145.0509  | 11.32 | 5.64  | 19.92 |
| 10.57     | 0.18 | 39.28 | 57.88 | 55.86     | 5.63 | 6.16  | 30.83 | 103.5715  | 6.15  | 4.41  | 18.96 | 145.36    | 6.7   | 5.78  | 20.48 |
| 12.6      | 0.3  | 37.46 | 48.63 | 59.18     | 5.4  | 9.51  | 29.48 | 103.8424  | 7.79  | 4.66  | 21.17 | 145.68    | 5.33  | 5.03  | 18.84 |
| 12.96     | 0.28 | 29.78 | 50.97 | 59.469    | 1.7  | 8.96  | 33.5  | 104.06    | 4.9   | 11.91 | 23.93 | 146       | 8.8   | 5.77  | 23.06 |
| 13.24     | 0.57 | 20.1  | 31.99 | 61.39     | 4.01 | 12.93 | 29.65 | 104.38    | 0.49  | 1.73  | 4.98  | 146.318   | 6.69  | 2.57  | 15.14 |
| 13.551    | 0.6  | 14.62 | 20.66 | 61.69     | 1.67 | 10    | 14.37 | 107.08    | 0.75  | 3.72  | 7.04  | 146.72    | 0.37  | 2.95  | 10.46 |
| 13.871    | 2.48 | 14.12 | 21.99 | 62.01     | 1.78 | 8.34  | 11.53 | 107.4     | 0.47  | 5.41  | 9.22  | 147.04    | 2.4   | 3.74  | 10.62 |
| 14.191    | 0.61 | 14.25 | 21.58 | 62.33     | 1.45 | 8.19  | 12.11 | 108.14    | 0.61  | 2.36  | 4.99  | 147.36    | 1.57  | 5.01  | 11.35 |
| 14.511    | 0.5  | 13.83 | 23.44 | 62.65     | 1.61 | 7.57  | 11.46 | 110.15    | 6.64  | 7.57  | 11.97 | 147.68    | 0.53  | 4.13  | 8.04  |
| 14.801    | 0.81 | 13.89 | 20.74 | 62.998    | 0.64 | 4.92  | 7.87  | 110.47    | 4.2   | 5.61  | 13.39 | 148       | 0.9   | 3.51  | 7.87  |
| 15.65     | 0.43 | 26.34 | 39.47 | 63.288    | 0.89 | 6.92  | 10.2  | 110.787   | 11.85 | 6.31  | 25.73 | 148.318   | 1.3   | 3.83  | 9.03  |
| 15.97     | 0.47 | 20.55 | 31.58 | 63.608    | 0.35 | 4.98  | 8.87  | 116.24    | 1.09  | 4.71  | 17.55 | 148.638   | 4.07  | 3.53  | 9.9   |
| 16.29     | 0.55 | 16.83 | 27.93 | 63.928    | 1.13 | 4.39  | 9.44  | 116.56    | 7.55  | 6.17  | 17.61 | 148.958   | 1.3   | 3.57  | 7.32  |
| 16.61     | 0.56 | 16.03 | 24.49 | 64.198    | 1.6  | 6.34  | 11.88 | 116.88    | 2.47  | 6.04  | 12.03 | 149.278   | 4.89  | 3.9   | 8.5   |
| 16.93     | 0.51 | 15.67 | 23.29 | 64.56     | 2.05 | 8.44  | 15.19 | 117.2     | 3.99  | 7.28  | 11.08 | 149.589   | 2.84  | 3.28  | 8.95  |
| 17.25     | 0.56 | 16.07 | 24.06 | 64.88     | 2.21 | 6.74  | 11.02 | 117.52    | 5.89  | 6.63  | 14.62 | 149.9007  | 6.96  | 5.24  | 13.01 |
| 17.57     | 0.68 | 16.27 | 24.76 | 65.2      | 1.62 | 7.58  | 11.21 | 117.838   | 1.18  | 4.6   | 11.06 | 150.2032  | 6.89  | 4.06  | 11.24 |
| 17.89     | 0.52 | 16.78 | 25.49 | 65.835    | 0.76 | 3.98  | 9.14  | 118.37    | 2.86  | 8.31  | 15.17 | 150.5038  | 3.25  | 4.16  | 8.59  |
| 18.21     | 0.31 | 24.84 | 39.09 | 65.515    | 1.3  | 4.01  | 9.88  | 118.43    | 8.07  | 7.93  | 21.8  | 150.8063  | 1.38  | 4.75  | 15.79 |
| 18.5141   | 0.54 | 23.14 | 42.77 | 65.975    | 2.26 | 5.93  | 17.49 | 118.69    | 2.21  | 9.14  | 15.99 | 151.1088  | 1.63  | 5.19  | 13.04 |
| 18.7398   | 0.81 | 18.61 | 32.33 | 66.015    | 2    | 5.27  | 15.71 | 119.01    | 3.71  | 8.66  | 17.92 | 151.6833  | 3.12  | 8.17  | 24.92 |
| 18.9655   | 0.82 | 17.63 | 32.76 | 66.095    | 1.45 | 4.05  | 8.77  | 119.33    | 4.8   | 8.88  | 23    | 151.9606  | 13.04 | 5.26  | 23.68 |
| 19.1912   | 0.34 | 31.3  | 48.17 | 67.47     | 1.51 | 8.24  | 11.04 | 119.65    | 6.43  | 4.93  | 15.74 | 152.0551  | 3.42  | 4.01  | 10.85 |
| 19.81     | 0.06 | 39.28 | 57.46 | 67.79     | 1.52 | 8.47  | 11.01 | 119.87    | 2.96  | 5.74  | 13.77 | 152.1896  | 7.9   | 7.82  | 16.1  |
| 20.13     | 0.05 | 37.77 | 59.33 | 68.1      | 1.35 | 5.93  | 10.8  | 120.6487  | 12.11 | 10.17 | 25.82 | 152.3391  | 0.67  | 5.56  | 13.12 |
| 21.6357   | 1.28 | 23.1  | 42.6  | 63.38     | 1.61 | 5.34  | 12.28 | 120.939   | 13.15 | 7.28  | 24.65 | 152.508   | 7.08  | 10.73 | 25.35 |
| 21.8705   | 0.35 | 35.27 | 52    | 70.52     | 2.27 | 8.05  | 15.67 | 121.2456  | 3.91  | 4.89  | 12.15 | 152.5798  | 10.46 | 9.25  | 25.75 |
| 22.074    | 0.11 | 38.55 | 56.22 | 70.84     | 2.62 | 9.39  | 14.31 | 121.5522  | 1.72  | 5.98  | 9.9   | 152.6516  | 5.88  | 8.83  | 22.55 |
| 22.44     | 0.08 | 35.5  | 59.61 | 71.16     | 2.87 | 9.34  | 13.77 | 121.8588  | 1.22  | 6.08  | 9.79  | 152.7234  | 11.01 | 7.96  | 24.06 |
| 25.12     | 0.78 | 16.08 | 25.66 | 72.9499   | 2.32 | 11.96 | 22.3  | 122.1653  | 18.72 | 5.99  | 18.39 | 152.87    | 1.43  | 5.99  | 9.69  |
| 25.44     | 1.02 | 21.22 | 33.82 | 73.2679   | 1.6  | 9.65  | 10.53 | 122.46    | 12.48 | 11.02 | 27.75 | 153.13    | 1.98  | 4.46  | 11.86 |
| 25.76     | 0.1  | 35.16 | 59.77 | 73.5859   | 1.6  | 8.26  | 10.06 | 122.78    | 3.98  | 13.06 | 23.32 | 158.91    | 4.97  | 4.3   | 12.87 |
| 26.62     | 0.19 | 35.32 | 59.86 | 73.9039   | 1.59 | 8.27  | 9.38  | 123.191   | 11.21 | 5.38  | 16.28 | 159.23    | 2.36  | 4.74  | 10.96 |
| 26.94     | 2.54 | 15.27 | 29.19 | 74.2218   | 1.52 | 7.82  | 8.69  | 123.431   | 1.16  | 5.88  | 15.19 | 161.0439  | 4.23  | 6.47  | 13.3  |
| 27.073    | 2.21 | 15.56 | 30.85 | 74.5398   | 1.54 | 8.73  | 9.53  | 123.751   | 1.15  | 7.61  | 12.65 | 161.2655  | 3.4   | 5.69  | 10.89 |
| 29.3      | 4.41 | 16.24 | 35.39 | 74.8578   | 1.56 | 9.09  | 12.09 | 126.5992  | 8.09  | 7.26  | 8.8   | 161.4871  | 17.34 | 3.64  | 20.41 |

|         |      |       |       |         |      |       |       |          |       |       |       |          |       |      |       |
|---------|------|-------|-------|---------|------|-------|-------|----------|-------|-------|-------|----------|-------|------|-------|
| 30.5775 | 1.21 | 13.37 | 18.18 | 75.1758 | 1.41 | 9.5   | 11.07 | 124.071  | 5.64  | 6.12  | 10.09 | 161.7087 | 10.8  | 4.82 | 26.12 |
| 29.6193 | 0.82 | 13.27 | 18.96 | 75.4938 | 0.87 | 6.6   | 16.05 | 125.6798 | 6.98  | 6.49  | 9.76  | 161.9234 | 1.39  | 6.69 | 21.49 |
| 29.9387 | 1.18 | 13.03 | 20.13 | 75.8118 | 1.59 | 9.95  | 14.42 | 125.9863 | 17.96 | 5.83  | 20.66 | 162.0683 | 2.07  | 7.24 | 12.54 |
| 30.2581 | 1.48 | 13.08 | 19.98 | 76.13   | 2.05 | 13.67 | 23.71 | 126.2927 | 5.72  | 7.01  | 9.89  | 162.2051 | 3.58  | 8.7  | 28.75 |
| 30.8889 | 1.25 | 13.09 | 17.81 | 77.322  | 2.43 | 10.37 | 19.79 | 126.9027 | 0.23  | 1.13  | 2.37  | 162.3376 | 1.32  | 5.49 | 20.8  |
| 31.847  | 1.12 | 12.53 | 18.34 | 76.69   | 1.92 | 10.99 | 20.36 | 127.2092 | 3.08  | 8.64  | 9.4   | 162.4787 | 3.92  | 6.28 | 16.76 |
| 32.1664 | 0.9  | 12.64 | 17.21 | 77.01   | 2.41 | 8.61  | 14.61 | 127.5156 | 1.19  | 5.42  | 8.11  | 162.5972 | 2.62  | 3.13 | 8.31  |
| 31.2082 | 0.77 | 12.9  | 16.98 | 79.66   | 2.07 | 10.84 | 16.77 | 127.822  | 0.69  | 5.58  | 8.84  | 165      | 3.87  | 5.65 | 11.71 |
| 31.5276 | 1.06 | 12.93 | 16.59 | 79.98   | 2    | 10.57 | 20.44 | 128.1285 | 2.01  | 4.99  | 8.69  | 165.32   | 2.99  | 6.21 | 12.75 |
| 32.458  | 0.96 | 15.14 | 21.04 | 81.99   | 5.16 | 13.49 | 31.26 | 128.43   | 5.05  | 7.38  | 16.84 | 165.64   | 6.72  | 5.27 | 19.19 |
| 32.674  | 1.05 | 14.2  | 19.72 | 82.7059 | 4.35 | 13.98 | 29.15 | 128.75   | 2.7   | 6.48  | 10.91 | 165.955  | 4     | 5.93 | 13.48 |
| 33.6916 | 0.95 | 12.65 | 17.35 | 82.87   | 4.36 | 5.7   | 11.61 | 129.07   | 2.89  | 7.78  | 12.73 | 166.275  | 3.84  | 6.32 | 11.83 |
| 32.951  | 1.46 | 13.06 | 18.69 | 83.2    | 5.41 | 7.44  | 14.69 | 129.39   | 2.29  | 8.1   | 11.73 | 166.595  | 6.22  | 5.83 | 16.1  |
| 33.1979 | 1.33 | 12.64 | 17.24 | 83.51   | 6.95 | 7.88  | 13.85 | 129.71   | 3.28  | 6.94  | 26.55 | 171.24   | 4.52  | 5.71 | 8.9   |
| 33.4448 | 0.92 | 12.75 | 16.76 | 83.84   | 1.8  | 4.91  | 14.06 | 130.03   | 4.26  | 5.78  | 24.5  | 174.19   | 16.24 | 4.38 | 18.26 |
| 33.94   | 1.03 | 13.19 | 24.73 | 84.15   | 2.17 | 4.4   | 12.64 | 130.346  | 0.43  | 2.85  | 6.82  | 174.47   | 11.28 | 3.72 | 15.78 |
| 34.26   | 1.04 | 13.99 | 18.11 | 85.78   | 1.3  | 3.09  | 7.27  | 131.4798 | 2.77  | 11.09 | 23.32 | 174.79   | 6.32  | 2.55 | 7.9   |
| 35.533  | 1.31 | 12.94 | 18.47 | 86.08   | 0.85 | 7.43  | 7.2   | 131.7962 | 0.62  | 3.02  | 7     | 177.2    | 2.96  | 1.25 | 3.9   |
| 34.573  | 1.04 | 13.6  | 19.25 | 86.4    | 0.79 | 5.54  | 12.35 | 132.1127 | 1.42  | 3.19  | 7.42  | 184.59   | 1.75  | 0.85 | 4.69  |
| 34.893  | 1.34 | 12.85 | 19.17 | 86.66   | 1.26 | 6.46  | 10.09 | 132.4292 | 3.92  | 5.46  | 21.36 | 184.91   | 0.52  | 1.02 | 5.53  |
| 35.213  | 1.42 | 12.72 | 17.62 | 87.034  | 0.14 | 1.45  | 3.13  | 132.7496 | 3.17  | 7.61  | 27    | 185.3    | 5.14  | 1.07 | 5.6   |
| 37.06   | 0.45 | 7.74  | 12.3  | 87.5    | 0.08 | 0.81  | 2.14  | 133.0561 | 1.7   | 6.13  | 17.56 | 185.55   | 0.25  | 0.83 | 2.15  |
| 38.266  | 0.48 | 5.7   | 9.76  | 87.8    | 0.59 | 4.35  | 9.48  | 133.3726 | 3.4   | 6.87  | 17.72 | 186.39   | 24.41 | 3.09 | 28.68 |
| 37.306  | 1.58 | 9.22  | 16.06 | 88.04   | 1.22 | 4.22  | 13.29 | 133.6891 | 1.6   | 5.15  | 15.39 | 186.66   | 8.1   | 3.35 | 16.27 |
| 38.586  | 0.94 | 6.36  | 11.68 | 88.81   | 0.18 | 1.46  | 4.28  | 134.0055 | 1.02  | 5.7   | 21.16 | 186.92   | 14.04 | 1.35 | 13.97 |
| 37.646  | 0.98 | 11.47 | 16.2  | 89.118  | 1.08 | 3.98  | 7.96  | 134.321  | 0.23  | 8.51  | 14.54 | 188.03   | 48.97 | 2.1  | 41.83 |
| 37.946  | 1.09 | 11.76 | 18.24 | 90.66   | 0.96 | 5.39  | 9.95  | 134.64   | 3.78  | 8.57  | 20.65 | 190      | 5.03  | 0.95 | 5.88  |
| 46.14   | 0.81 | 13.73 | 21.77 | 91.85   | 0.09 | 0.96  | 3.43  | 134.96   | 3.7   | 8.21  | 16.77 | 190.5    | 1.07  | 1.78 | 4.57  |
| 46.45   | 2.17 | 12.57 | 21.82 | 92.17   | 0.98 | 6.6   | 9.26  | 135.273  | 4.3   | 8.1   | 17.78 | 191      | 1.49  | 0.87 | 2.88  |
| 46.77   | 2.18 | 13.21 | 20.5  | 94.5292 | 0.48 | 3.22  | 6.74  | 135.593  | 1.96  | 6.89  | 18.49 | 191.16   | 1.38  | 3.04 | 6.46  |
| 47.09   | 1.31 | 10.78 | 16.04 | 94.8211 | 1.67 | 4.9   | 13.42 | 135.913  | 2.41  | 9.11  | 14.32 | 192.5151 | 2.56  | 2.7  | 5.79  |
| 47.72   | 2.18 | 13.47 | 19.24 | 95.1324 | 3.15 | 6.53  | 24.78 | 136.233  | 2.83  | 6.39  | 14.76 | 192.8715 | 9.01  | 1.46 | 9.19  |
| 48.042  | 2.21 | 11.61 | 20.41 | 95.4438 | 0.71 | 8.31  | 11.9  | 137.57   | 6.32  | 9.35  | 21.97 | 193.29   | 3.68  | 2.48 | 6.62  |
| 48.362  | 1.45 | 11.74 | 15.8  | 95.7551 | 0.97 | 8.28  | 9.29  | 137.89   | 2.88  | 8.66  | 18.8  |          |       |      |       |
| 48.682  | 2.36 | 11.7  | 19.78 | 96.0665 | 0.98 | 6.98  | 8.41  | 138.21   | 4.45  | 11.03 | 23.14 |          |       |      |       |
| 49.33   | 0.2  | 1.25  | 3.9   | 96.3778 | 1.19 | 6.32  | 7.36  | 138.502  | 11.4  | 8.64  | 26.24 |          |       |      |       |
| 49.64   | 1.44 | 12.15 | 18.99 | 96.6892 | 1.23 | 7.7   | 7.92  | 138.842  | 2.66  | 7.34  | 12.26 |          |       |      |       |
| 49.97   | 1.17 | 1.27  | 5.43  | 96.9422 | 1.22 | 8.78  | 7.23  | 139.162  | 13.4  | 6.18  | 22.32 |          |       |      |       |
| 50.26   | 0.06 | 1.28  | 3.14  | 97.3119 | 1.27 | 8.96  | 8.9   | 139.482  | 4.59  | 8.04  | 18.13 |          |       |      |       |
| 52.23   | 1.01 | 11.91 | 22.67 | 97.599  | 1.32 | 7.92  | 9.4   | 139.802  | 0.87  | 6.64  | 17.91 |          |       |      |       |
| 52.55   | 0.06 | 36.75 | 55.35 | 97.94   | 1.24 | 8.38  | 9.12  | 140.66   | 4.9   | 5.45  | 20.82 |          |       |      |       |
| 52.87   | 0.06 | 37.45 | 58.58 | 98.2519 | 1.17 | 7.36  | 8.24  | 140.94   | 5.3   | 4.91  | 18.61 |          |       |      |       |
| 55.2964 | 1.25 | 10.31 | 15.48 | 98.5637 | 1.22 | 7.68  | 5.68  | 141.26   | 3.27  | 5.27  | 19.01 |          |       |      |       |
| 55.5076 | 0.05 | 38.25 | 59.78 | 98.8755 | 1.16 | 7.32  | 5.3   | 141.576  | 0.66  | 5.22  | 20.45 |          |       |      |       |
| 55.7407 | 0.06 | 36.39 | 60.52 | 99.1824 | 1.19 | 8.94  | 7.47  | 141.896  | 1.5   | 5.43  | 12.53 |          |       |      |       |

## Captions for databases S1 to S4

### Additional data table S1 (separate file)

Diatom data (percentages) for Core MAG14-2A. Diatom counts are per slide. Diatoms were present between 43.11 and 132.11 m. Diatoms were absent above these depths and mostly absent below the diatomaceous units, although a few, very rare taxa were observed in some chert horizons and basal limestones.

### Additional data table S2 (separate file)

Raw diatom counts for MAG14-2A

### Additional data table S3 (separate file)

Pollen data (percentages) from MAG14-2A. Poaceae and aquatics form a separate pollen sum. Afromontane, woodland and herbaceous taxa calculated together.

### Additional data table S3 (separate file)

Raw pollen counts for MAG14-2A.

## 9. References for SI citations

1. Cohen A, Campisano C, Arrowsmith R, Asrat A, Behrensmeyer AK, Deino A, Feibel C, Hill A, Johnson R, Kingston J, Lamb H, Lowenstein T, Noren A, Olago D, Owen RB, Potts R, Reed K, Renaut R, Schäbitz F, Tiercelin J.-J, Trauth M, Wynn J, Ivory S, Brady C, O'Grady R, Rodysill J, Githiri J, Russell J, Foerster V, Dommain R, Rucina S, Deocampo D, Billingsley A, Beck C, Dullo L, Feary D, Garelló D, Johnson T, Junginger A, Karanja M, Kimburi E, Mbuthia A, McCartney T, McNulty E, Muiruri V, Nambiro E, Njagi D, Norman J, Rabideaux N, Raub T, Sier M, Smith P, Urban J, Warren M, Wondiyimu E, Yost C (2016) The Hominin Sites and Paleolakes Drilling Project: inferring the environmental context of human evolution from eastern African rift lake deposits. *Sci Drill* 21:1–16.
2. Blaauw M, Christen A (2011) Flexible paleoclimate age-depth models using an autoregressive gamma process. *Bayesian Anal* 6:1–18.
3. Shen C.-C, Cheng H, Edwards RL (2003) Measurement of attogram quantities of  $^{231}\text{Pa}$  in dissolved and particulate fractions of seawater by isotope dilution thermal ionization mass spectroscopy. *Anal Chem* 75:1075–1079.
4. Shen C-C, Wu C-C, Cheng H, Edwards RL, Hsieh Y-T, Gallet S, Chang C-C, Li T, Lam DD, Kano A, Hori M, Spötl C (2012) High-precision and high-resolution carbonate  $^{230}\text{Th}$  dating by MC-ICP-MS with SEM protocols. *Geochim Cosmochim Acta* 99:71–86.
5. Cheng H, Edwards RL, Shen C-C, Polyak VJ, Asmerom Y, Woodhead J (2013) Improvements in  $^{230}\text{Th}$  dating,  $^{230}\text{Th}$  and  $^{234}\text{U}$  half-life values, and U-Th isotopic measurements by multi-collector inductively coupled plasma mass spectrometry. *Earth Planet Sci Let* 371-372:82–91.
6. Niespolo EM, Rutte D, Deino AL, Renne PR (2017) Intercalibration and age of the Alder Creek sanidine  $^{40}\text{Ar}/^{39}\text{Ar}$  standard. *Quat. Geochronol* 39:205–213.
7. Lee J-Y, Marti K, Severinghaus JP, Kawamura K., Yoo H.-S., Lee J. B., Kim J. S., A redetermination of the isotopic abundances of atmospheric Ar. *Geochim. Cosmochim. Acta* **70**, 4507–4512 (2006).
8. Min KW, Mundil R, Renne PR, Ludwig KR (2000) A test for systematic errors in Ar-40/Ar-39 geochronology through comparison with U/Pb analysis of a 1.1-Ga rhyolite. *Geochim Cosmochim Acta* 64(1):73–98.

9. Deino AL, Scott G, Saylor B, Mulugeta A, Angelini JD, Haile-Selassie Y (2010)  $^{40}\text{Ar}/^{39}\text{Ar}$  dating, paleomagnetism, and tephrochemistry of Pliocene strata of the hominid-bearing Woranso-Mille area, west-central Afar Rift, Ethiopia. *J Hum Evo.* 58:111–126.
10. Leys C, Ley C, Klein O, Bernard P, Licata L (2013) Detecting outliers: Do not use standard deviation around the mean, use absolute deviation around the median. *J Exp Soc Psychol* 49:764–766.
11. Koymans MR, Langereis CG, Pastor-Galán D, van Hinsbergen DJ (2016) Paleomagnetism.org: An online multi-platform open source environment for paleomagnetic data analysis. *Comput Geosci* 93:127–137.
12. Fisher R (1953) Dispersion on a Sphere. *Proc Roy Soc Lond Ser A Mat. Phys Eng Sci* 217:295–305.
13. Zijderveld JDA (2013) A. C. Demagnetization of Rocks: Analysis of Results, in *Methods in Palaeomagnetism*, eds Collinson DW, Creer KM, Runcorn SK (Elsevier, Amsterdam, New York) pp 254–286.
14. Kirschvink J (1980) The least-square line and plane and the analysis of paleomagnetic data. *Geophys J Roy Astronom Soc* 62:699–718.
15. Tauxe L, Butler RF, van der Voo R, Banerjee SK (2010) *Essentials of Paleomagnetism* (University of California Press, California).
16. Deenen MHL, Langereis CG, van Hinsbergen DJJ, Biggin AJ (2011) Geomagnetic secular variation and the statistics of palaeomagnetic directions. *Geophys J Int* 186:509–520.
17. Fuller M (1969) Magnetic orientation of borehole cores. *Geophysics* 34:772–774.
18. Sier MJ, Langereis CG, Dupont-nivet G, Feibel CS, Joordens JCA, Beck CC, Olago D, Cohen A, WTK Science team members (2017) The top of the Olduvai Subchron in a high-resolution magnetostratigraphy from the West Turkana core WTK13, hominin sites and Paleolakes Drilling Project (HSPDP). *Quat Geochronol* 42:117–129.
19. Gradstein FM, Ogg JG, Schmitz MD, Ogg GM (2012) *The Geologic Time Scale* (Elsevier).
20. Roberts AP, Florindo F, Larrasoana JC, O'Regan MA, Zhao X (2010) Complex polarity pattern at the former Plio-Pleistocene global stratotype section at Vrica (Italy): Remagnetization by magnetic iron sulphides. *Earth Planet Sci Lett* 292:98–111.
21. Vasiliev I, Franke C, Meeldijk JD, Dekkers MJ, Langereis CG, Krijgsman W (2008) Putative greigite magnetofossils from the Pliocene epoch. *Nature Geosci* 1:782–786.
22. Gasse F (1980) Les diatomées lacustres plio-pléistocènes du Gadeb (Ethiopie): systématique, paléoécologie, biostratigraphie. *Rev Algol* 3:1–249.
23. Gasse F (1986) East African diatoms. Taxonomy, ecological distribution. *Bibl Diatomol* 11:1–264.
24. Krammer K, Lange-Bertalot H (1991) *Bacillariophyceae, Susswasserflora von Mitteleuropa* (Gustav Fischer, Verlag).
25. Faegri K, Iversen J (1989) *Textbook of pollen analysis* (Chichester: John Wiley)
26. Moore PD, Webb JA, Collinson ME (1991) *Pollen analysis* (Blackwell).
27. Hamilton AC (1975) A quantitative analysis of altitudinal zonation in Ugandan forests. *Vegetation. Plant Ecol* 30:99–106.
28. Hamilton AC (1982) *Environmental history of East Africa: a study of the Quaternary*. Lond Acad Press.
29. Marchant RA, Taylor DM, Hamilton AC (1997) Late Pleistocene and Holocene history of Mubwindi Swamp, south-west Uganda. *Quat Res* 47:316–328
